# Supplementary material for: Hypoiodous acid initiated rearrangement of tertiary propargylic alcohols to α-iodoenones
Source: Royal Society of Chemistry journal article supplement (doi:10.1039/c2ob26360b), 2012-01-01

# Hypoiodous acid initiated rearrangement of tertiary propargylic alcohols to $\alpha$ -iodoenones

Wesley J. Moran\* and Arantxa Rodríguez\*

*Department of Chemical & Biological Sciences, University of Huddersfield, Huddersfield HD1 3DH (UK)*

E-mail: w.j.moran@hud.ac.uk, a.r.menendez@hud.ac.uk

**General.**  $^1\text{H}$  NMR spectra were recorded at either 400 or 500 MHz. Chemical shifts are reported in ppm from tetramethylsilane with the solvent resonance as the internal standard ( $\text{CDCl}_3$ : 7.26 ppm). Data are reported as follows: chemical shift, integration, multiplicity (s = singlet, d = doublet, t = triplet, q = quartet, br = broad, m = multiplet), and coupling constants (Hz).  $^{13}\text{C}$  NMR were recorded with complete proton decoupling. Chemical shifts are reported in ppm from tetramethylsilane with the solvent as the internal standard ( $\text{CDCl}_3$ : 77.4 ppm). Mass spectrometry (m/z) was performed in ESI mode, with only molecular ions being reported. Infrared (IR) spectra  $\nu_{\text{max}}$  are reported in  $\text{cm}^{-1}$ . Bands are characterized as broad (br), strong (s), medium (m) and weak (w). All purchased reagents were used as received without further purification. THF was dried with  $3\text{\AA}$  molecular sieves then distilled from sodium benzophenone ketyl. Petroleum ether refers to the fraction boiling at 40-60 °C. **2o**<sup>1</sup> is a known compound and its analytical data matched that in the literature.

**Representative procedure for the preparation of the starting materials: Synthesis of 1-((4-tert-butylphenyl)ethynyl)cyclopentanol, 2d**

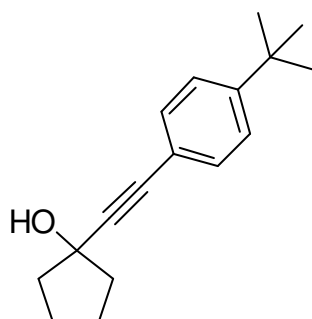

<sup>1</sup> T. Ishikawa, T. Mizuta, K. Hagiwara, T. Aikawa, T. Kudo and S. Saito, *J. Org. Chem.*, 2003, **68**, 3702.

4-*tert*-Butylphenylacetylene (0.88 mL, 4.9 mmol) was dissolved in THF (20 mL) at -78 °C under a N<sub>2</sub> atmosphere. *n*-BuLi (2.2 M, 2.2 mL, 4.9 mmol) was added dropwise. After 0.5 hours, the resulting mixture was added *via* cannula to a solution of cyclopentanone (0.43 mL, 4.9 mmol) in THF (20 mL) and stirred at -78 °C for a further 2 hours. The reaction was quenched by addition of water, extracted with EtOAc, dried (MgSO<sub>4</sub>), filtered and concentrated. The residue was purified by flash chromatography (silica gel; 20:1 petroleum ether/EtOAc) to provide a white solid (1.06 g, 89%).

Mp: 65-67 °C

IR (neat): 997 (s), 2958 (m), 3267 (br) cm<sup>-1</sup>.

<sup>1</sup>H NMR (500 MHz, CDCl<sub>3</sub>): δ 1.30 (9H, s), 1.72-2.11 (9H, m), 7.32 (2H, d, *J* = 9.5 Hz), 7.36 (2H, d, *J* = 9.5 Hz).

<sup>13</sup>C NMR (126 MHz, CDCl<sub>3</sub>): δ 22.9 (2C), 30.6 (3C), 34.1, 42.0 (2C), 74.4, 82.6, 91.6, 119.2, 124.6 (2C), 130.7 (2C), 150.8.

MS: *m/z* (M+23) 265.2

HRMS: *m/z* calc'd for C<sub>17</sub>H<sub>22</sub>NaO 265.1563, found 265.1560

#### Data for 1-(*p*-tolylethynyl)cyclopentanol **2e**

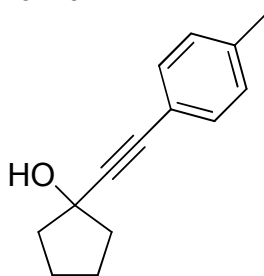

Mp: 55-57 °C

IR (neat): 990 (s), 2963 (m), 3283 (br) cm<sup>-1</sup>.

<sup>1</sup>H NMR (500 MHz, CDCl<sub>3</sub>): δ 1.72-1.92 (5H, m), 1.96-2.11 (4H, m), 2.34 (3H, s), 7.10 (2H, d, *J* = 7.9 Hz), 7.31 (2H, d, *J* = 8.1 Hz).

<sup>13</sup>C NMR (126 MHz, CDCl<sub>3</sub>): δ 21.8, 23.9 (2C), 43.0 (2C), 75.4, 83.6, 92.5, 120.1, 129.4 (2C), 131.9 (2C), 138.6.

MS:  $m/z$  (M+23) 223.1

HRMS:  $m/z$  calc'd for  $C_{14}H_{16}NaO$  223.1093, found 223.1089

**Data for 1-((4-ethylphenyl)ethynyl)cyclopentanol 2f**

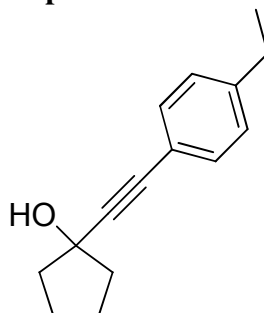

Mp: 50-52 °C

IR (neat): 991 (s), 3966 (m), 3276 (br)  $cm^{-1}$ .

$^1H$  NMR (500 MHz,  $CDCl_3$ ):  $\delta$  1.22 (3H, t,  $J = 7.6$  Hz), 1.72-1.94 (5H, m), 1.96-2.12 (4H, m), 2.63 (2H, q,  $J = 7.6$  Hz), 7.13 (2H, d,  $J = 8.2$  Hz), 7.34 (2H, d,  $J = 8.2$  Hz).

$^{13}C$  NMR (126 MHz,  $CDCl_3$ ):  $\delta$  15.7, 23.9 (2C), 29.2, 43.0 (2C), 75.4, 83.7, 92.5, 120.4, 128.2 (2C), 132.0 (2C), 145.0.

MS:  $m/z$  (M+23) 237.1

HRMS:  $m/z$  calc'd for  $C_{15}H_{18}NaO$  237.1250, found 237.1255

**Data for 1-((4-butylphenyl)ethynyl)cyclopentanol 2g**

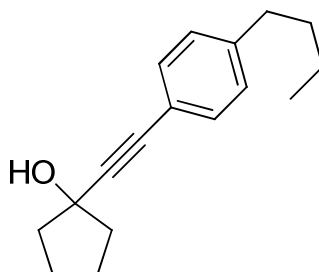

Oil

IR (neat): 992 (s), 2929 (m), 2956 (m), 3341 (br)  $cm^{-1}$ .

$^1\text{H}$  NMR (500 MHz,  $\text{CDCl}_3$ ):  $\delta$  0.92 (3H, t,  $J = 7.4$  Hz), 1.34 (2H, hexet,  $J = 7.6$  Hz), 1.53-1.62 (2H, m), 1.72-1.92 (4H, m), 1.97-2.11 (5H, m), 2.59 (2H, t,  $J = 7.8$  Hz), 7.11 (2H, d,  $J = 8.2$  Hz), 7.33 (2H, d,  $J = 8.2$  Hz).

$^{13}\text{C}$  NMR (126 MHz,  $\text{CDCl}_3$ ):  $\delta$  14.3, 22.7, 23.9 (2C), 33.8, 35.9, 43.0 (2C), 75.4, 83.7, 92.6, 120.3, 128.7 (2C), 131.9 (2C), 143.7.

MS:  $m/z$  ( $M+23$ ) 265.2

HRMS:  $m/z$  calc'd for  $\text{C}_{17}\text{H}_{22}\text{NaO}$  265.1563, found 265.1550

#### Data for 1-((4-methoxyphenyl)ethynyl)cyclopentanol 2h

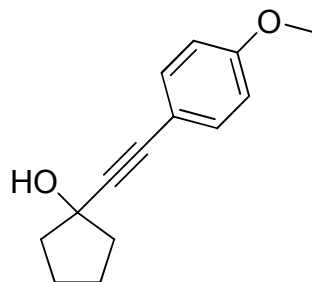

Oil

IR (neat): 988 (s), 1170 (s), 1247 (s), 1509 (s), 1608 (m), 2954 (w), 3297 (br)  $\text{cm}^{-1}$ .

$^1\text{H}$  NMR (500 MHz,  $\text{CDCl}_3$ ):  $\delta$  1.71-1.91 (4H, m), 1.96-2.10 (5H, m), 3.80 (3H, s), 6.82 (2H, d,  $J = 8.8$  Hz), 7.35 (2H, d,  $J = 8.8$  Hz).

$^{13}\text{C}$  NMR (126 MHz,  $\text{CDCl}_3$ ):  $\delta$  23.9 (2C), 42.9 (2C), 55.6, 75.3, 83.3, 91.8, 114.2 (2C), 115.4, 133.4 (2C), 159.8.

MS:  $m/z$  ( $M+23$ ) 239.1

HRMS:  $m/z$  calc'd for  $\text{C}_{14}\text{H}_{16}\text{NaO}_2$  239.1043, found 239.1046

**Data for 1-((4-(pentyloxy)phenyl)ethynyl)cyclopentanol 2i**

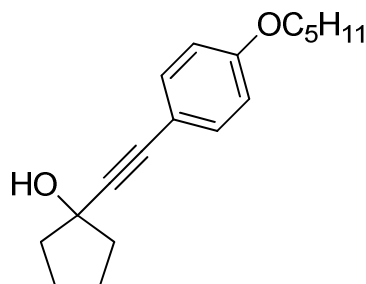

Oil

IR (neat): 1244 (s), 1508 (s), 1606 (m), 2955 (m), 3380 (br)  $\text{cm}^{-1}$ .

$^1\text{H}$  NMR (500 MHz,  $\text{CDCl}_3$ ):  $\delta$  0.93 (3H, t,  $J = 7.2$  Hz), 1.32-1.47 (4H, m), 1.71-1.91 (6H, m), 1.96-2.10 (5H, m), 3.93 (2H, t,  $J = 6.6$  Hz), 6.81 (2H, d,  $J = 8.9$  Hz), 7.33 (2H, d,  $J = 8.9$  Hz).

$^{13}\text{C}$  NMR (126 MHz,  $\text{CDCl}_3$ ):  $\delta$  14.4, 22.8, 23.9 (2C), 28.5, 29.3, 42.9 (2C), 68.4, 75.3, 82.4, 91.7, 114.8 (2C), 115.1, 133.4 (2C), 159.5.

MS:  $m/z$  ( $M+23$ ) 295.2

HRMS:  $m/z$  calc'd for  $\text{C}_{18}\text{H}_{24}\text{NaO}_2$  295.1669, found 295.1662

**Data for 1-((3-fluorophenyl)ethynyl)cyclopentanol 2j**

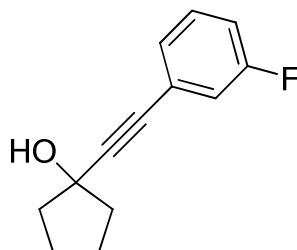

Oil

IR (neat): 992 (s), 1579 (s) 1608 (m), 2965 (w), 3332 (br)  $\text{cm}^{-1}$ .

$^1\text{H}$  NMR (500 MHz,  $\text{CDCl}_3$ ):  $\delta$  1.75-1.96 (4H, m), 1.99-2.13 (5H, m), 7.03 (1H, tdd,  $J = 8.5, 2.6, 1.2$  Hz), 7.14 (1H, ddd,  $J = 9.6, 2.6, 1.4$  Hz), 7.22 (1H, dt,  $J = 7.7, 1.3$  Hz), 7.25-7.31 (1H, m).

$^{13}\text{C}$  NMR (126 MHz,  $\text{CDCl}_3$ ):  $\delta$  23.9 (2C), 42.9 (2C), 75.2, 82.3 (d,  $J = 3.0$  Hz), 94.2, 115.9 (d,  $J = 20$  Hz), 118.8 (d,  $J = 23$  Hz), 125.1 (d,  $J = 9.6$  Hz), 127.9 (d,  $J = 2.6$  Hz), 130.2 (d,  $J = 9.6$  Hz), 162.6 (d,  $J = 247$  Hz).

MS:  $m/z$  ( $M+23$ ) 227.1

HRMS:  $m/z$  calc'd for  $\text{C}_{13}\text{H}_{13}\text{FNaO}$  227.0843, found 227.0840

#### Data for 1-((4-*tert*-butylphenyl)ethynyl)cyclohexanol 2k

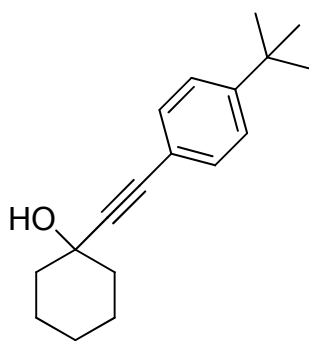

Mp: 120-122 °C

IR (neat): 962 (s)m 1069 (m), 2930 (m), 3248 (br)  $\text{cm}^{-1}$ .

$^1\text{H}$  NMR (500 MHz,  $\text{CDCl}_3$ ):  $\delta$  1.30 (9H, s), 1.51-1.78 (8H, m), 1.95-2.08 (3H, m), 7.32 (2H, d,  $J = 8.7$  Hz), 7.37 (2H, d,  $J = 8.6$  Hz).

$^{13}\text{C}$  NMR (126 MHz,  $\text{CDCl}_3$ ):  $\delta$  23.8 (2C), 25.6, 31.5 (3C), 35.1, 40.5 (2C), 69.5, 84.9, 92.5, 120.2, 125.6 (2C), 131.8 (2C), 151.9.

MS:  $m/z$  ( $M+23$ ) 279.2

HRMS:  $m/z$  calc'd for  $\text{C}_{18}\text{H}_{24}\text{NaO}$  279.1719, found 279.1720

#### Data for 1-((4-*tert*-butylphenyl)ethynyl)cycloheptanol 2m

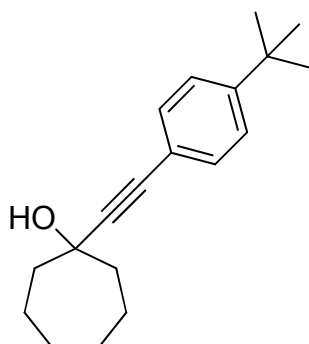

Mp: 89-90 °C

IR (neat): 1028 (s), 2923 (m), 3243 (br)  $\text{cm}^{-1}$ .

$^1\text{H}$  NMR (500 MHz,  $\text{CDCl}_3$ ):  $\delta$  1.35 (9H, s), 1.55-1.82 (8H, m), 1.94-2.04 (2H, m), 2.14-2.23 (2H, m), 2.92 (1H, br), 7.35 (2H, *d*,  $J = 8.4$  Hz), 7.44 (2H, *d*,  $J = 8.4$  Hz).

$^{13}\text{C}$  NMR (126 MHz,  $\text{CDCl}_3$ ):  $\delta$  22.6 (2C), 28.1 (2C), 31.4 (3C), 34.9, 43.4 (2C), 72.4, 83.9, 93.6, 120.3, 125.4 (2C), 131.6 (2C), 151.4.

MS:  $m/z$  ( $M+23$ ) 293.2

HRMS:  $m/z$  calc'd for  $\text{C}_{19}\text{H}_{26}\text{NaO}$  293.1876, found 293.1876

### Data for 1-((4-*tert*-butylphenyl)ethynyl)cyclooctanol 2n

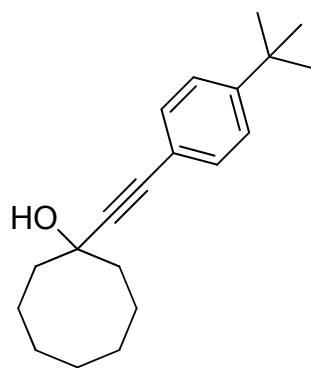

Mp: 115-116 °C

IR (neat): 980.1 (s), 2916 (m), 3264 (br)  $\text{cm}^{-1}$ .

$^1\text{H}$  NMR (500 MHz,  $\text{CDCl}_3$ ):  $\delta$  1.34 (9H, s), 1.49-1.60 (3H, m), 1.62-1.81 (7H, m), 2.00-2.14 (4H, m), 2.45 (1H, br), 7.34 (2H, *d*,  $J = 8.5$  Hz), 7.41 (2H, *d*,  $J = 8.4$  Hz).

$^{13}\text{C}$  NMR (126 MHz,  $\text{CDCl}_3$ ):  $\delta$  22.5 (2C), 24.8, 28.3 (2C), 31.4 (3C), 34.9, 38.7 (2C), 72.0, 83.6, 93.5, 120.3, 125.5 (2C), 131.7 (2C), 151.5.

MS:  $m/z$  ( $M+23$ ) 307.2

HRMS:  $m/z$  calc'd for  $\text{C}_{20}\text{H}_{28}\text{NaO}$  307.2032, found 307.2036

### Data for 3-methyl-1-phenylpent-1-yn-3-ol 2p

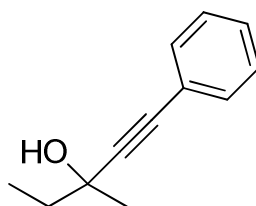

Colourless oil

IR (neat): 1124 (m), 1153 (m), 2971 (m), 3362 (br)  $\text{cm}^{-1}$ .

$^1\text{H}$  NMR (400 MHz,  $\text{CDCl}_3$ ):  $\delta$  1.11 (3H, t,  $J = 7.4$  Hz), 1.57 (3H, s), 1.79 (2H, qd,  $J = 7.3, 2.9$  Hz), 2.13 (1H, br), 7.27-7.33 (3H, m), 7.38-7.46 (2H, m).

$^{13}\text{C}$  NMR (100 MHz,  $\text{CDCl}_3$ ):  $\delta$  9.5, 29.7, 37.0, 69.5, 83.7, 93.0, 123.1, 128.6 (3C), 132.0 (2C).

MS:  $m/z$  (M+23) 197.1

HRMS:  $m/z$  calc'd for  $\text{C}_{12}\text{H}_{14}\text{NaO}$  197.0937, found 197.0941

### Data for 3,4,4-trimethyl-1-phenylpent-1-yn-3-ol 2q

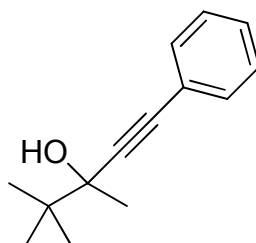

Colourless oil

IR (neat): 901 (m), 1070 (m), 2968 (m), 3453 (br)  $\text{cm}^{-1}$ .

$^1\text{H}$  NMR (400 MHz,  $\text{CDCl}_3$ ):  $\delta$  1.12 (9H, s), 1.54 (3H, s), 1.99 (1H, s), 7.27-7.34 (3H, m), 7.38-7.47 (2H, m).

$^{13}\text{C}$  NMR (100 MHz,  $\text{CDCl}_3$ ):  $\delta$  25.1, 25.6 (3C), 38.9, 74.7, 84.2, 93.2, 123.3, 128.5, 128.6 (2C), 134.0 (2C).

MS:  $m/z$  (M+23) 225.1

HRMS:  $m/z$  calc'd for  $\text{C}_{14}\text{H}_{18}\text{NaO}$  225.1250, found 225.1253



**General procedure for the oxidative rearrangement to  $\alpha$ -iodoenones 4: Synthesis of 1-(4-*tert*-butylphenyl)-2-cyclopentylidene-2-iodoethanone **4d**.**

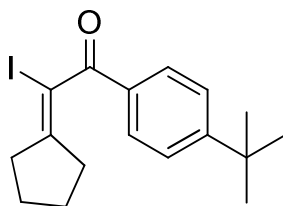

1-(4-*tert*-Butylphenyl)ethynyl)cyclopentanol **2d** (0.21 mmol), *m*-CPBA (109 mg, 0.63 mmol), sodium iodide (31 mg, 0.21 mmol) and trichloroacetic acid (51 mg, 0.31 mmol) were dissolved in acetonitrile (1 mL) at room temperature under a nitrogen atmosphere and stirred overnight. The reaction mixture was quenched with saturated aqueous sodium thiosulfate solution and extracted with CH<sub>2</sub>Cl<sub>2</sub>. The organic layer was washed with saturated aqueous sodium bicarbonate solution, dried over MgSO<sub>4</sub>, filtered and concentrated under reduced pressure. The residue was purified by flash chromatography (silica gel; 9:1 petroleum ether/ethyl acetate) to afford 1-(4-*tert*-butylphenyl)-2-cyclopentylidene-2-iodoethanone **4d** as a pale yellow oil (58 mg, 75%).

IR (neat): 1108 (m), 1187 (m), 1255 (s), 1602 (s), 1656 (s), 2959 (w) cm<sup>-1</sup>.

<sup>1</sup>H NMR (400 MHz, CDCl<sub>3</sub>):  $\delta$  1.35 (9H, s), 1.72-1.86 (4H, m), 2.26 (2H, t,  $J$  = 6.6 Hz), 2.53 (2H, t,  $J$  = 7.3 Hz), 7.47 (2H, d,  $J$  = 8.6 Hz), 7.86 (2H, d,  $J$  = 8.6 Hz).

<sup>13</sup>C NMR (100 MHz, CDCl<sub>3</sub>):  $\delta$  25.8, 29.0, 31.4 (3C), 34.3, 35.6, 41.1, 85.8, 126.1 (2C), 130.3 (2C), 132.1, 157.8, 158.2, 193.1.

MS:  $m/z$  (M+23) 391.1

HRMS:  $m/z$  calc'd for C<sub>17</sub>H<sub>21</sub>INaO 391.0529, found 391.0542.

**Data for 2-cyclopentylidene-2-iodo-1-*p*-tolylethanone **4e****

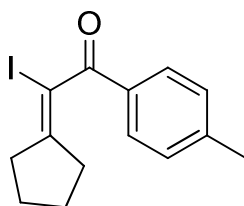

Oil

IR (neat): 1175 (s), 1243 (s), 1601 (s), 1652 (s), 2952 (w) cm<sup>-1</sup>.

$^1\text{H}$  NMR (400 MHz,  $\text{CDCl}_3$ ):  $\delta$  1.71-1.86 (4H, m), 2.21-2.28 (2H, m), 2.42 (3H, s), 2.49-2.56 (2H, m), 7.26 (2H, d,  $J = 7.9$  Hz), 7.82 (2H, d,  $J = 8.2$  Hz).

$^{13}\text{C}$  NMR (100 MHz,  $\text{CDCl}_3$ ):  $\delta$  22.3, 25.9, 29.1, 34.5, 41.2, 86.1, 129.8 (2C), 130.5 (2C), 132.5, 144.8, 158.5, 193.1.

MS:  $m/z$  ( $M+23$ ) 349.0

HRMS:  $m/z$  calc'd for  $\text{C}_{14}\text{H}_{15}\text{INaO}$  349.0060, found 349.0065.

#### Data for 2-cyclopentylidene-1-(4-ethylphenyl)-2-iodoethanone 4f

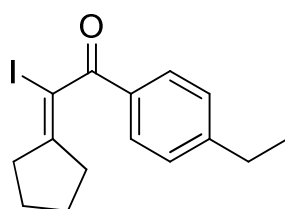

Oil

IR (neat): 1060 (m), 1177 (m), 1253 (s), 1602 (s), 1655 (s), 2869 (w), 2961 (w)  $\text{cm}^{-1}$ .

$^1\text{H}$  NMR (400 MHz,  $\text{CDCl}_3$ ):  $\delta$  1.26 (3H, t,  $J = 7.6$  Hz), 1.77-1.87 (4H, m), 2.25 (2H, t,  $J = 6.3$  Hz), 2.53 (2H, t,  $J = 7.1$  Hz), 2.67-2.77 (2H, m), 7.28 (2H, d,  $J = 8.1$  Hz), 7.85 (2H, d,  $J = 8.2$  Hz).

$^{13}\text{C}$  NMR (100 MHz,  $\text{CDCl}_3$ ):  $\delta$  15.5, 25.8, 29.0, 29.4, 34.4, 41.1, 85.9, 128.6 (2C), 130.5 (2C), 132.4, 151.0, 158.4, 193.2.

MS:  $m/z$  ( $M+23$ ) 363.0

HRMS:  $m/z$  calc'd for  $\text{C}_{15}\text{H}_{17}\text{INaO}$  363.0216, found 363.0220.

#### Data for 1-(4-butylphenyl)-2-cyclopentylidene-2-iodoethanone 4g

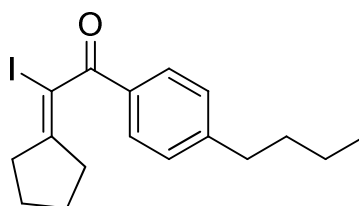

Oil

IR (neat): 1177 (m), 1248 (m), 1603 (s), 1656 (s), 2954 (m)  $\text{cm}^{-1}$ .

$^1\text{H}$  NMR (400 MHz,  $\text{CDCl}_3$ ):  $\delta$  0.93 (3H, t,  $J = 7.3$  Hz), 1.31-1.42 (2H, m), 1.56-1.70 (2H, m), 1.72-1.85 (4H, m), 2.25 (2H, t,  $J = 6.1$  Hz), 2.52 (2H, t,  $J = 7.2$  Hz), 2.67 (2H, t,  $J = 7.7$  Hz), 7.26 (2H, d,  $J = 8.3$  Hz), 7.83 (2H, d,  $J = 8.3$  Hz)..

$^{13}\text{C}$  NMR (100 MHz,  $\text{CDCl}_3$ ):  $\delta$  14.3, 22.8, 25.8, 29.1, 33.6, 34.4, 36.2, 41.1, 85.9, 129.2 (2C), 130.5 (2C), 132.4, 149.8, 158.4, 193.2.

MS:  $m/z$  ( $M+23$ ) 391.0

HRMS:  $m/z$  calc'd for  $\text{C}_{17}\text{H}_{21}\text{INaO}$  391.0529, found 391.0535

#### Data for 2-cyclopentylidene-2-iodo-1-(4-methoxyphenyl)ethanone 4h

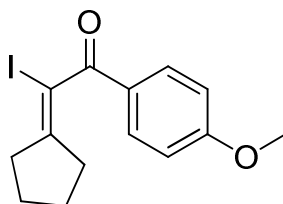

Oil

IR (neat): 1022 (m), 1158 (s), 1247 (s), 1454 (m), 1592 (s), 1650 (m), 2956 (w)  $\text{cm}^{-1}$ .

$^1\text{H}$  NMR (400 MHz,  $\text{CDCl}_3$ ):  $\delta$  1.72-1.86 (4H, m), 2.25 (2H, t,  $J = 6.1$  Hz), 2.51 (2H, t,  $J = 7.2$  Hz), 3.87 (3H, s), 6.94 (2H, d,  $J = 8.9$  Hz), 7.91 (2H, d,  $J = 9.0$  Hz).

$^{13}\text{C}$  NMR (100 MHz,  $\text{CDCl}_3$ ):  $\delta$  25.8, 29.0, 34.2, 40.9, 55.9, 85.7, 114.4 (2C), 127.4, 132.8 (2C), 157.6, 164.3, 192.2.

MS:  $m/z$  ( $M+23$ ) 365.0

HRMS:  $m/z$  calc'd for  $\text{C}_{14}\text{H}_{15}\text{INaO}_2$  365.0009, found 365.0009.

#### Data for 2-cyclopentylidene-2-iodo-1-(4-(pentyloxy)phenyl)ethanone 4i

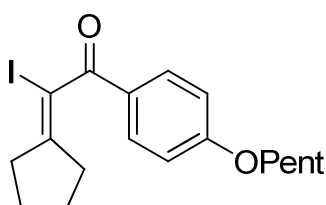

Oil

IR (neat): 1158 (s), 1246 (s), 1595 (s), 1650 (m), 2954 (w)  $\text{cm}^{-1}$ .

$^1\text{H}$  NMR (400 MHz,  $\text{CDCl}_3$ ):  $\delta$  0.93 (3H, t,  $J = 7.0$  Hz), 1.32-1.50 (4H, m), 1.72-1.85 (6H, m), 2.25 (2H, t,  $J = 7.0$  Hz), 2.51 (2H, t,  $J = 7.2$  Hz), 4.02 (2H, t,  $J = 6.5$  Hz), 6.92 (2H, d,  $J = 8.9$  Hz), 7.89 (2H, d,  $J = 8.9$  Hz).

$^{13}\text{C}$  NMR (100 MHz,  $\text{CDCl}_3$ ):  $\delta$  14.4, 22.8, 25.9, 28.5, 29.0, 29.1, 34.2, 40.9, 68.7, 85.7, 114.8 (2C), 127.1, 132.8 (2C), 157.4, 164.0, 192.2.

MS:  $m/z$  ( $M+23$ ) 421.1

HRMS:  $m/z$  calc'd for  $\text{C}_{18}\text{H}_{23}\text{INaO}_2$  421.0635, found 421.0650.

#### Data for 2-cyclopentylidene-1-(3-fluorophenyl)-2-iodoethanone **4j**

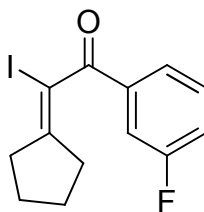

Oil

IR (neat): 1257 (s), 1440 (m), 1587 (m), 1663 (m), 2959 (w)  $\text{cm}^{-1}$ .

$^1\text{H}$  NMR (400 MHz,  $\text{CDCl}_3$ ):  $\delta$  1.73-1.88 (4H, m), 2.26 (2H, t,  $J = 6.0$  Hz), 2.53 (2H, t,  $J = 7.4$  Hz), 7.23-7.29 (1H, m), 7.40-7.47 (1H, m), 7.55-7.60 (1H, m), 7.66-7.70 (1H, m).

$^{13}\text{C}$  NMR (100 MHz,  $\text{CDCl}_3$ ):  $\delta$  25.7, 29.0, 34.6, 41.4, 85.2, 116.7 (d,  $J = 22$  Hz), 120.8 (d,  $J = 21$  Hz), 125.9 (d,  $J = 3.0$  Hz), 130.7 (d,  $J = 7.8$  Hz), 137.3 (d,  $J = 6.2$  Hz), 160.4, 163.1 (d,  $J = 248$  Hz), 192.1.

MS:  $m/z$  ( $M+23$ ) 353.0

HRMS:  $m/z$  calc'd for  $\text{C}_{13}\text{H}_{12}\text{FINaO}$  352.9809, found 352.9812.

**Data for 1-(4-*tert*-butylphenyl)-2-cyclohexylidene-2-iodoethanone 4k**

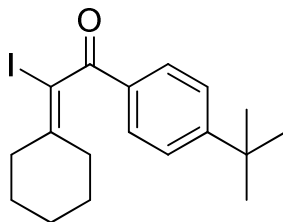

Oil

IR (neat): 1184 (s), 1245 (s), 1264 (s), 1602 (s), 1659 (s), 2929 (w)  $\text{cm}^{-1}$ .

$^1\text{H}$  NMR (400 MHz,  $\text{CDCl}_3$ ):  $\delta$  1.34 (9H, s), 1.40-1.48 (2H, m), 1.52-1.60 (2H, m), 1.66-1.75 (2H, m), 2.18-2.25 (2H, m), 2.49-2.58 (2H, m), 7.48 (2H, d,  $J = 8.6$  Hz), 7.91 (2H, d,  $J = 8.6$  Hz).

$^{13}\text{C}$  NMR (100 MHz,  $\text{CDCl}_3$ ):  $\delta$  26.2, 27.8, 28.0, 31.4 (3C), 33.6, 35.6, 39.2, 88.3, 126.2 (2C), 130.4 (2C), 131.6, 149.4, 158.0, 193.3.

MS:  $m/z$  ( $M+23$ ) 405.1

HRMS:  $m/z$  calc'd for  $\text{C}_{18}\text{H}_{23}\text{INaO}$  405.0686, found 405.0689.

**Data for 2-cycloheptylidene-2-iodo-1-phenylethanone 4l**

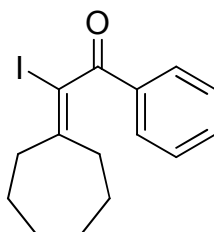

Oil

IR (neat): 1172 (m), 1235 (s), 1447 (m), 1659 (s), 2921 (w)  $\text{cm}^{-1}$ .

$^1\text{H}$  NMR (400 MHz,  $\text{CDCl}_3$ ):  $\delta$  1.46-1.56 (4H, m), 1.57-1.65 (2H, m), 1.70-1.79 (2H, m), 2.31-2.39 (2H, m), 2.56-2.64 (2H, m), 7.47 (2H, t,  $J = 7.7$  Hz), 7.55-7.61 (1H, m), 7.95-7.99 (2H, m).

$^{13}\text{C}$  NMR (100 MHz,  $\text{CDCl}_3$ ):  $\delta$  26.8, 27.9, 29.0, 29.9, 33.9, 40.8, 91.5, 129.1 (2C), 130.4 (2C), 134.0, 134.3, 151.6, 193.5.

MS:  $m/z$  ( $M+23$ ) 363.0

HRMS:  $m/z$  calc'd for  $\text{C}_{15}\text{H}_{17}\text{INaO}$  363.0216, found 363.0217

**Data for 1-(4-*tert*-butylphenyl)-2-cycloheptylidene-2-iodoethanone 4m**

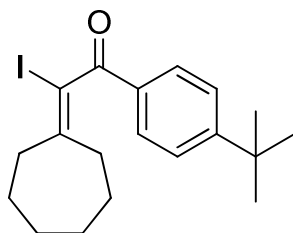

Oil

IR (neat): 1108 (m), 1183 (s), 1252 (s), 1602 (s), 1658 (s), 2924 (w)  $\text{cm}^{-1}$ .

$^1\text{H}$  NMR (400 MHz,  $\text{CDCl}_3$ ):  $\delta$  1.35 (9H, s), 1.48-1.55 (4H, m), 1.58-1.65 (2H, m), 1.70-1.77 (2H, m), 2.33-2.38 (2H, m), 2.57-2.62 (2H, m), 7.48 (2H, d,  $J = 8.6$  Hz), 7.91 (2H, d,  $J = 8.6$  Hz).

$^{13}\text{C}$  NMR (100 MHz,  $\text{CDCl}_3$ ):  $\delta$  26.8, 28.0, 29.0, 30.0, 31.4 (3C), 33.8, 35.6, 40.8, 91.7, 126.1 (2C), 130.4 (2C), 131.5, 151.0, 157.9, 193.2.

MS:  $m/z$  ( $M+23$ ) 419.1

HRMS:  $m/z$  calc'd for  $\text{C}_{19}\text{H}_{25}\text{INaO}$  419.0842, found 419.0851.

**Data for 1-(4-*tert*-butylphenyl)-2-cyclooctylidene-2-iodoethanone 4n**

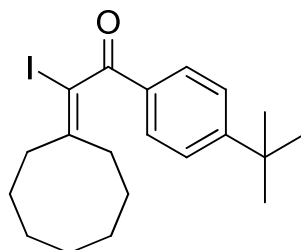

Oil

IR (neat): 1105 (m), 1183 (m), 1253 (s), 1602 (s), 1658 (s), 2923 (w)  $\text{cm}^{-1}$ .

$^1\text{H}$  NMR (400 MHz,  $\text{CDCl}_3$ ):  $\delta$  1.35 (9H, s), 1.41-1.50 (2H, m), 1.52-1.68 (6H, m), 1.81-1.88 (2H, m), 2.25-2.31 (2H, m), 2.53-2.58 (2H, m), 7.48 (2H, d,  $J = 8.6$  Hz), 7.90 (2H, d,  $J = 8.5$  Hz).

$^{13}\text{C}$  NMR (100 MHz,  $\text{CDCl}_3$ ):  $\delta$  25.6, 26.1, 26.5, 26.8, 27.6, 31.5 (3C), 34.1, 35.6, 38.6, 91.1, 126.1 (2C), 130.4 (2C), 131.6, 151.6, 157.9, 193.3.

MS:  $m/z$  ( $M+23$ ) 433.1

HRMS:  $m/z$  calc'd for  $\text{C}_{20}\text{H}_{27}\text{INaO}$  433.0999, found 433.1005.

**Data for 3-ethyl-2-iodo-1-phenylpent-2-en-1-one 4o**

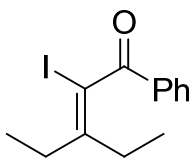

Oil

IR (neat): 1233 (s), 1448 (m), 1662 (s), 2968 (w)  $\text{cm}^{-1}$ .

$^1\text{H}$  NMR (400 MHz,  $\text{CDCl}_3$ ):  $\delta$  0.97 (3H, t,  $J = 7.7$  Hz), 1.16 (3H, t,  $J = 7.5$  Hz), 2.20 (2H, q,  $J = 7.5$  Hz), 2.48 (2H, q,  $J = 7.5$  Hz), 7.47 (2H, t,  $J = 7.7$  Hz), 7.55-7.59 (1H, m), 7.94-7.97 (2H, m).

$^{13}\text{C}$  NMR (100 MHz,  $\text{CDCl}_3$ ):  $\delta$  12.3, 13.5, 27.0, 32.6, 90.8, 129.1 (2C), 130.4 (2C), 134.1, 134.4, 153.2, 193.3.

MS:  $m/z$  ( $M+23$ ) 337.0

HRMS:  $m/z$  calc'd for  $\text{C}_{13}\text{H}_{15}\text{INaO}$  337.0060, found 337.0060.

**Data for (*E*)- and (*Z*)-2-iodo-3-methyl-1-phenylpent-2-en-1-one 4p**

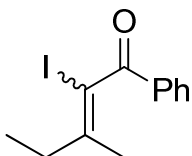

Formed as a 1:1 mixture of alkene geometrical isomers which can be partially separated.

Oil

IR (neat): 1238 (s), 1448 (m), 1661 (s), 2970 (w)  $\text{cm}^{-1}$ .

NMR data for (*E*)-isomer (determined by NOESY experiments):

$^1\text{H}$  NMR (400 MHz,  $\text{CDCl}_3$ ):  $\delta$  0.98 (3H, t,  $J = 7.5$  Hz), 2.12 (3H, s), 2.19 (2H, q,  $J = 7.5$  Hz), 7.47 (2H, t,  $J = 7.7$  Hz), 7.58 (1H, t,  $J = 7.7$  Hz), 7.97 (2H, d,  $J = 7.7$  Hz).

$^{13}\text{C}$  NMR (100 MHz,  $\text{CDCl}_3$ ):  $\delta$  13.1, 26.4, 29.5, 91.3, 129.1 (2C), 130.4 (2C), 134.1, 134.2, 148.6, 193.5.

NMR data for (*Z*)-isomer:

$^1\text{H}$  NMR (400 MHz,  $\text{CDCl}_3$ ):  $\delta$  1.14 (3H, t,  $J = 7.6$  Hz), 1.81 (3H, s), 2.47 (2H, q,  $J = 7.6$  Hz), 7.47 (2H, t,  $J = 7.6$  Hz), 7.58 (1H, t,  $J = 7.4$  Hz), 7.94 (2H, d,  $J = 7.4$  Hz).

$^{13}\text{C}$  NMR (100 MHz,  $\text{CDCl}_3$ ):  $\delta$  11.8, 19.6, 35.8, 89.8, 129.1 (2C), 130.3 (2C), 134.1 (2C), 147.9, 193.6.

MS:  $m/z$  ( $M+23$ ) 323.0

HRMS:  $m/z$  calc'd for  $\text{C}_{12}\text{H}_{13}\text{INaO}$  322.9904, found 322.9903.

**Data for (*E*)-2-iodo-3,4,4-trimethyl-1-phenylpent-2-en-1-one 4q**

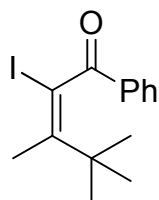

Alkene geometry determined by NOESY experiments.

Oil

IR (neat): 1231 (s), 1451 (m), 1661 (s), 2969 (w)  $\text{cm}^{-1}$ .

$^1\text{H}$  NMR (400 MHz,  $\text{CDCl}_3$ ):  $\delta$  1.10 (9H, s), 2.25 (3H, s), 7.47 (2H, t,  $J = 7.4$  Hz), 7.55 (1H, t,  $J = 7.2$  Hz), 7.99 (2H, d,  $J = 7.5$  Hz).

$^{13}\text{C}$  NMR (100 MHz,  $\text{CDCl}_3$ ):  $\delta$  28.8, 30.5 (3C), 40.6, 96.0, 129.0 (2C), 130.4 (2C), 133.7, 134.2, 151.2, 193.2.

MS:  $m/z$  ( $M+23$ ) 351.0

HRMS:  $m/z$  calc'd for  $\text{C}_{14}\text{H}_{17}\text{INaO}$  351.0216, found 351.0219.



# <sup>1</sup>H NMR spectrum for 1-((4-*tert*-butylphenyl)ethynyl)cyclopentanol, 2d

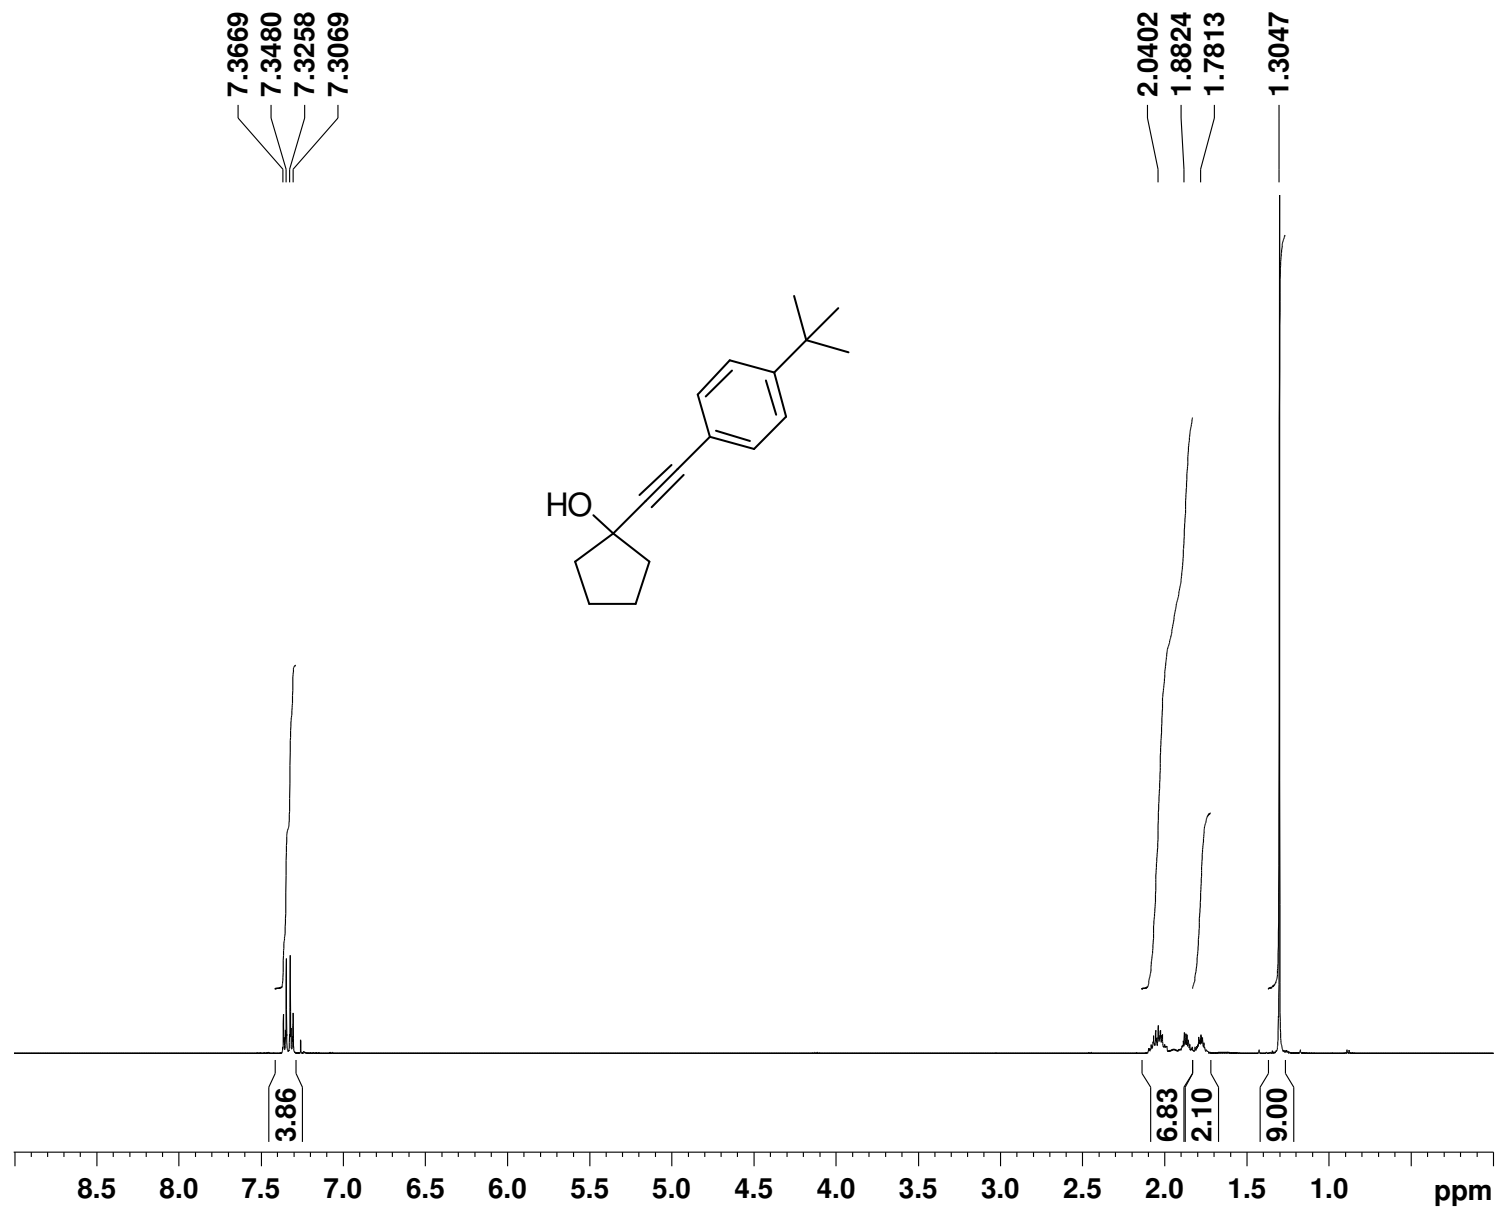

Current Data Parameters  
NAME ARM-1162  
EXPNO 10  
PROCNO 1

F2 - Acquisition Parameters  
Date\_ 20120118  
Time 13.20  
INSTRUM av500sgu  
PROBHD 5 mm PABBO BB-  
PULPROG zg30  
TD 65536  
SOLVENT CDCl3  
NS 16  
DS 2  
SWH 10330.578 Hz  
FIDRES 0.157632 Hz  
AQ 3.1719923 sec  
RG 144  
DW 48.400 usec  
DE 6.00 usec  
TE 295.9 K  
D1 1.00000000 sec  
TDO 1

==== CHANNEL f1 =====  
NUC1 1H  
P1 9.70 usec  
PL1 0.10 dB  
PL1W 22.82879257 W  
SFO1 500.1330885 MHz

F2 - Processing parameters  
SI 32768  
SF 500.1300134 MHz  
WDW EM  
SSB 0  
LB 0.30 Hz  
GB 0  
PC 1.00

<sup>13</sup>C NMR spectrum for 1-((4-*tert*-butylphenyl)ethynyl)cyclopentanol, 2d

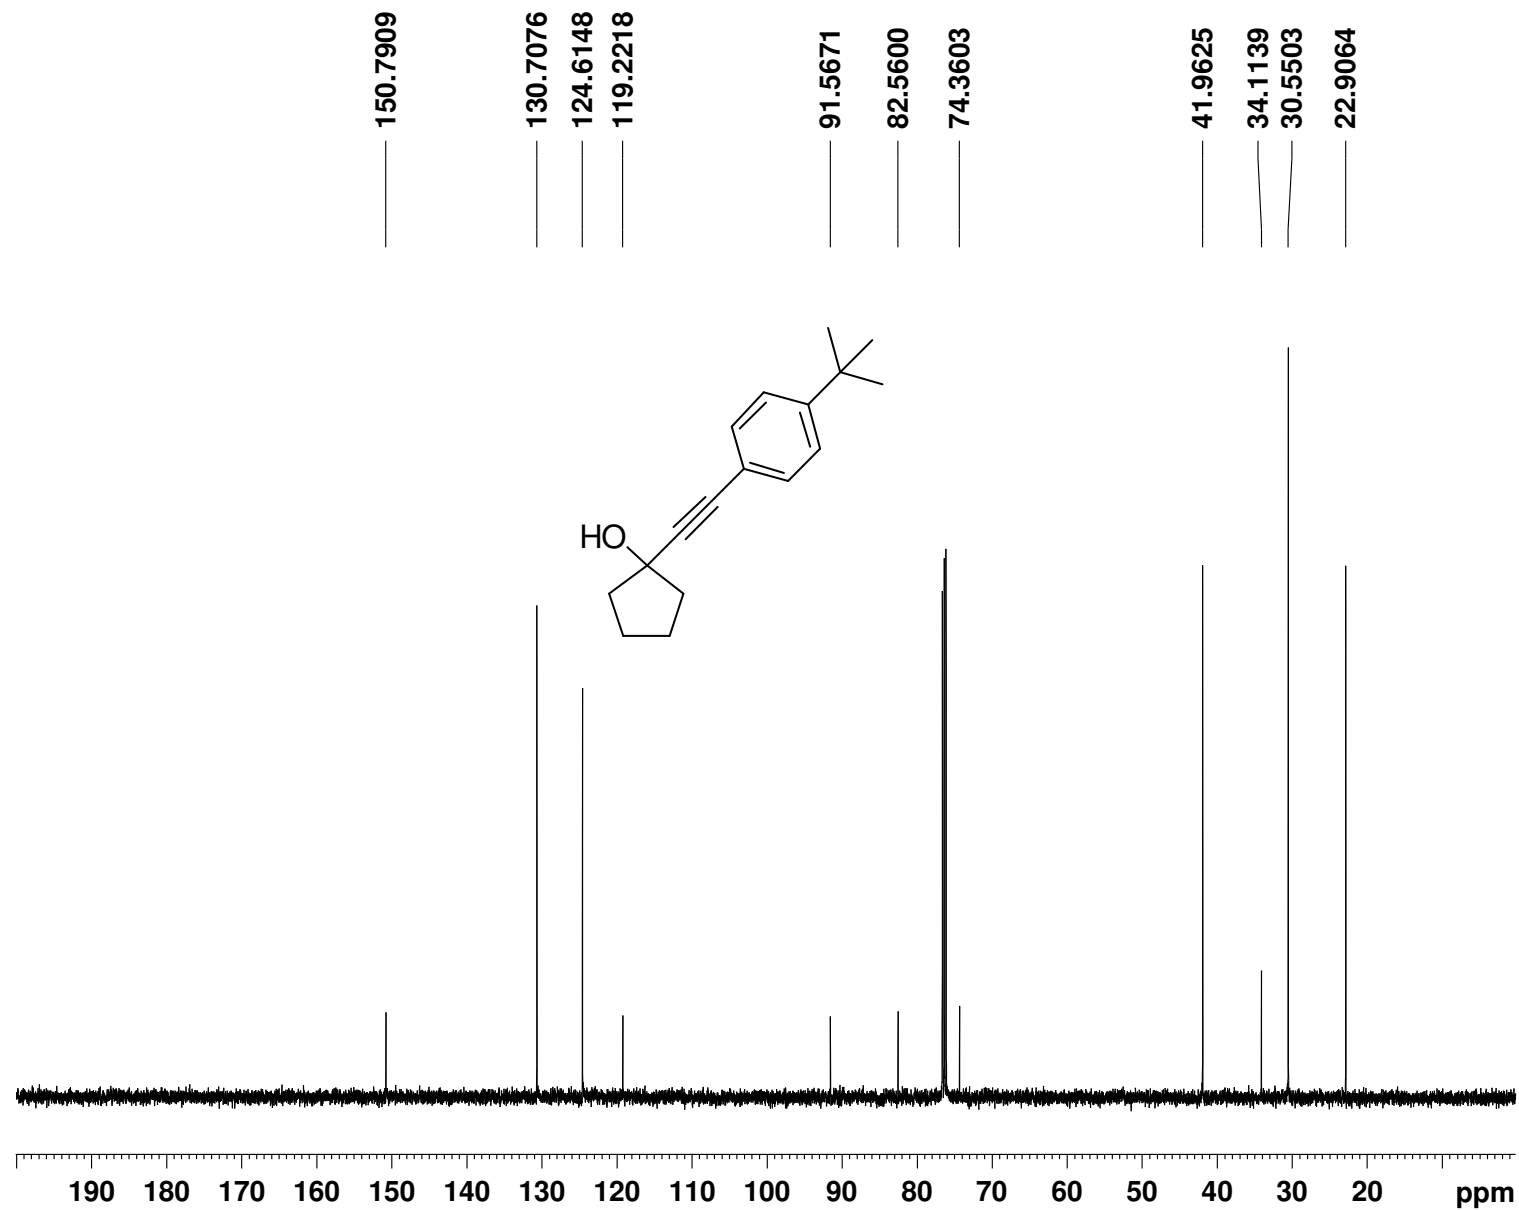

Current Data Parameters  
NAME ARM-1162  
EXPNO 11  
PROCNO 1

F2 - Acquisition Parameters  
Date\_ 20120118  
Time 13.24  
INSTRUM av500sgu  
PROBHD 5 mm PABBO BB-  
PULPROG zgpg30  
TD 65536  
SOLVENT CDC13  
NS 81  
DS 4  
SWH 30030.029 Hz  
FIDRES 0.458222 Hz  
AQ 1.0912244 sec  
RG 13000  
DW 16.650 usec  
DE 6.00 usec  
TE 297.0 K  
D1 2.0000000 sec  
D11 0.03000000 sec  
TDO 8

===== CHANNEL f1 =====  
NUC1 13C  
P1 9.00 usec  
PL1 0.00 dB  
SFO1 125.7703637 MHz

===== CHANNEL f2 =====  
CPDPRG2 waltz16  
NUC2 1H  
PCPD2 80.00 usec  
PL2 0.00 dB  
PL12 18.00 dB  
PL13 18.00 dB  
PL2W 23.36054420 W  
PL12W 0.37023968 W  
PL13W 0.37023968 W  
SFO2 500.1320005 MHz

F2 - Processing parameters  
SI 32768  
SF 125.7578687 MHz  
WDW EM  
SSB 0  
LB 1.00 Hz  
GB 0  
PC 1.40

# <sup>1</sup>H NMR spectrum for 1-(*p*-tolylethynyl)cyclopentanol 2e

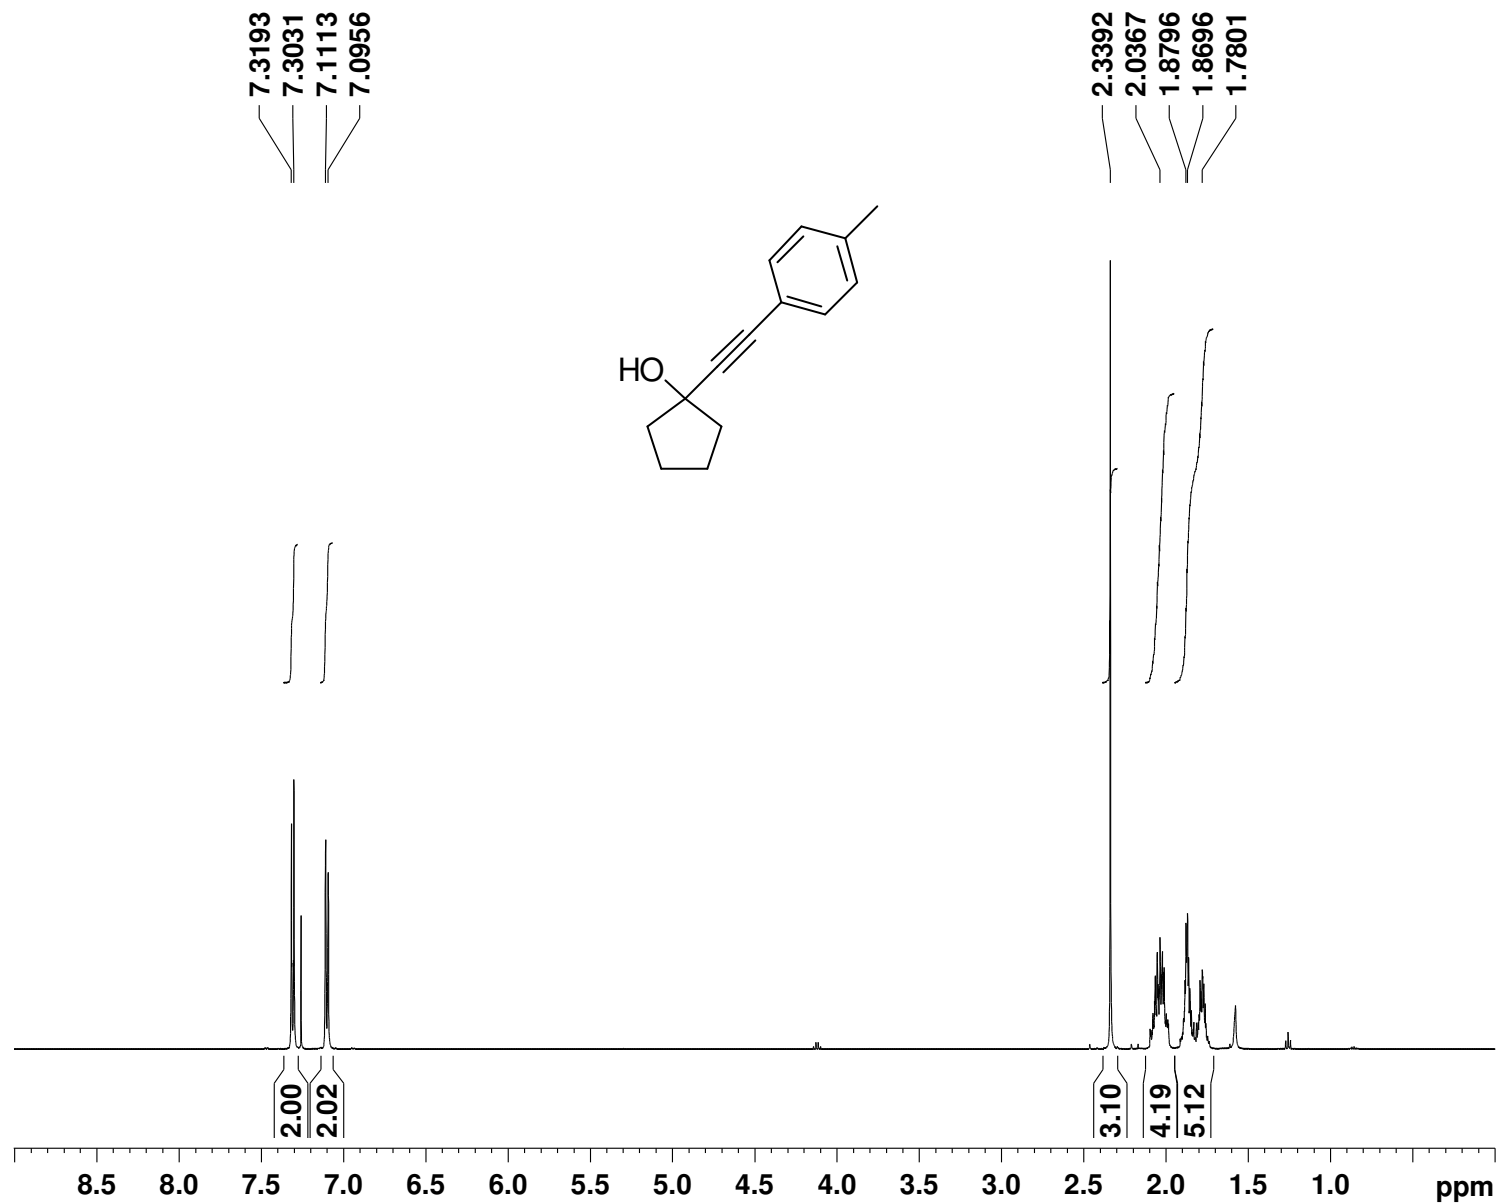

Current Data Parameters  
NAME ARM-1192  
EXPNO 10  
PROCNO 1

F2 - Acquisition Parameters  
Date\_ 20120118  
Time 13.42  
INSTRUM av500sgu  
PROBHD 5 mm PABBO BB-  
PULPROG zg30  
TD 65536  
SOLVENT CDCl3  
NS 16  
DS 2  
SWH 10330.578 Hz  
FIDRES 0.157632 Hz  
AQ 3.171923 sec  
RG 322  
DW 48.400 usec  
DE 6.00 usec  
TE 296.0 K  
D1 1.00000000 sec  
TD0 1

===== CHANNEL f1 =====  
NUC1 1H  
P1 9.70 usec  
PL1 0.10 dB  
PL1W 22.82879257 W  
SFO1 500.1330885 MHz

F2 - Processing parameters  
SI 32768  
SF 500.1300138 MHz  
WDW EM  
SSB 0  
LB 0.30 Hz  
GB 0  
PC 1.00

<sup>13</sup>C NMR spectrum for 1-(*p*-tolylethynyl)cyclopentanol 2e

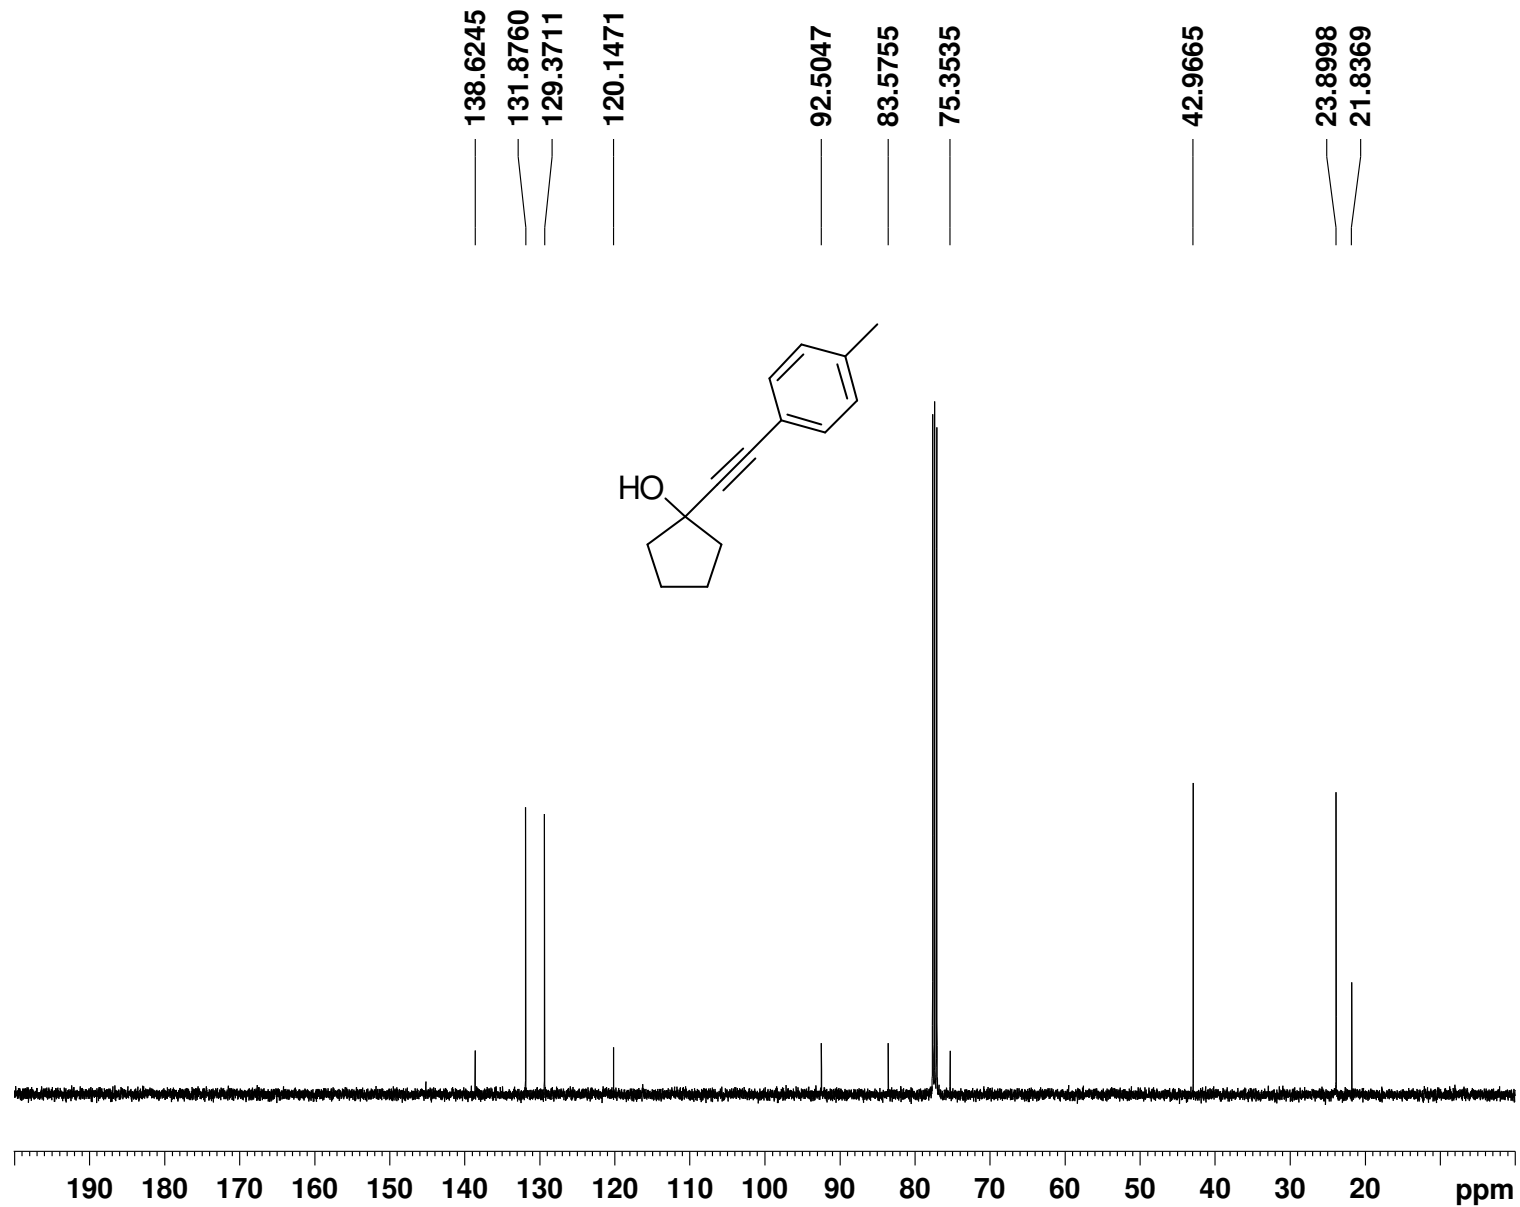

```
Current Data Parameters
NAME      ARM-1192
EXPNO    11
PROCNO   1

F2 - Acquisition Parameters
Date_    20120118
Time     13.45
INSTRUM  av500sgu
PROBHD   5 mm PABBO BB-
PULPROG  zgpg30
TD       65536
SOLVENT  CDCl3
NS       256
DS       4
SWH      30030.029 Hz
FIDRES   0.458222 Hz
AQ       1.0912244 sec
RG       14600
DW       16.650 usec
DE       6.00 usec
TE       297.1 K
D1       2.00000000 sec
D11      0.03000000 sec
TD0      8

===== CHANNEL f1 =====
NUC1     13C
P1       9.00 usec
PL1      0.00 dB
SFO1     125.7703637 MHz

===== CHANNEL f2 =====
CPDPRG2  waltz16
NUC2     1H
PCPD2    80.00 usec
PL2      0.00 dB
PL12     18.00 dB
PL13     18.00 dB
PL2W     23.36054420 W
PL12W    0.37023968 W
PL13W    0.37023968 W
SFO2     500.1320005 MHz

F2 - Processing parameters
SI       32768
SF       125.7577435 MHz
WDW      EM
SSB      0
LB       1.00 Hz
GB       0
PC       1.40
```

# <sup>1</sup>H NMR spectrum for 1-((4-ethylphenyl)ethynyl)cyclopentanol 2f

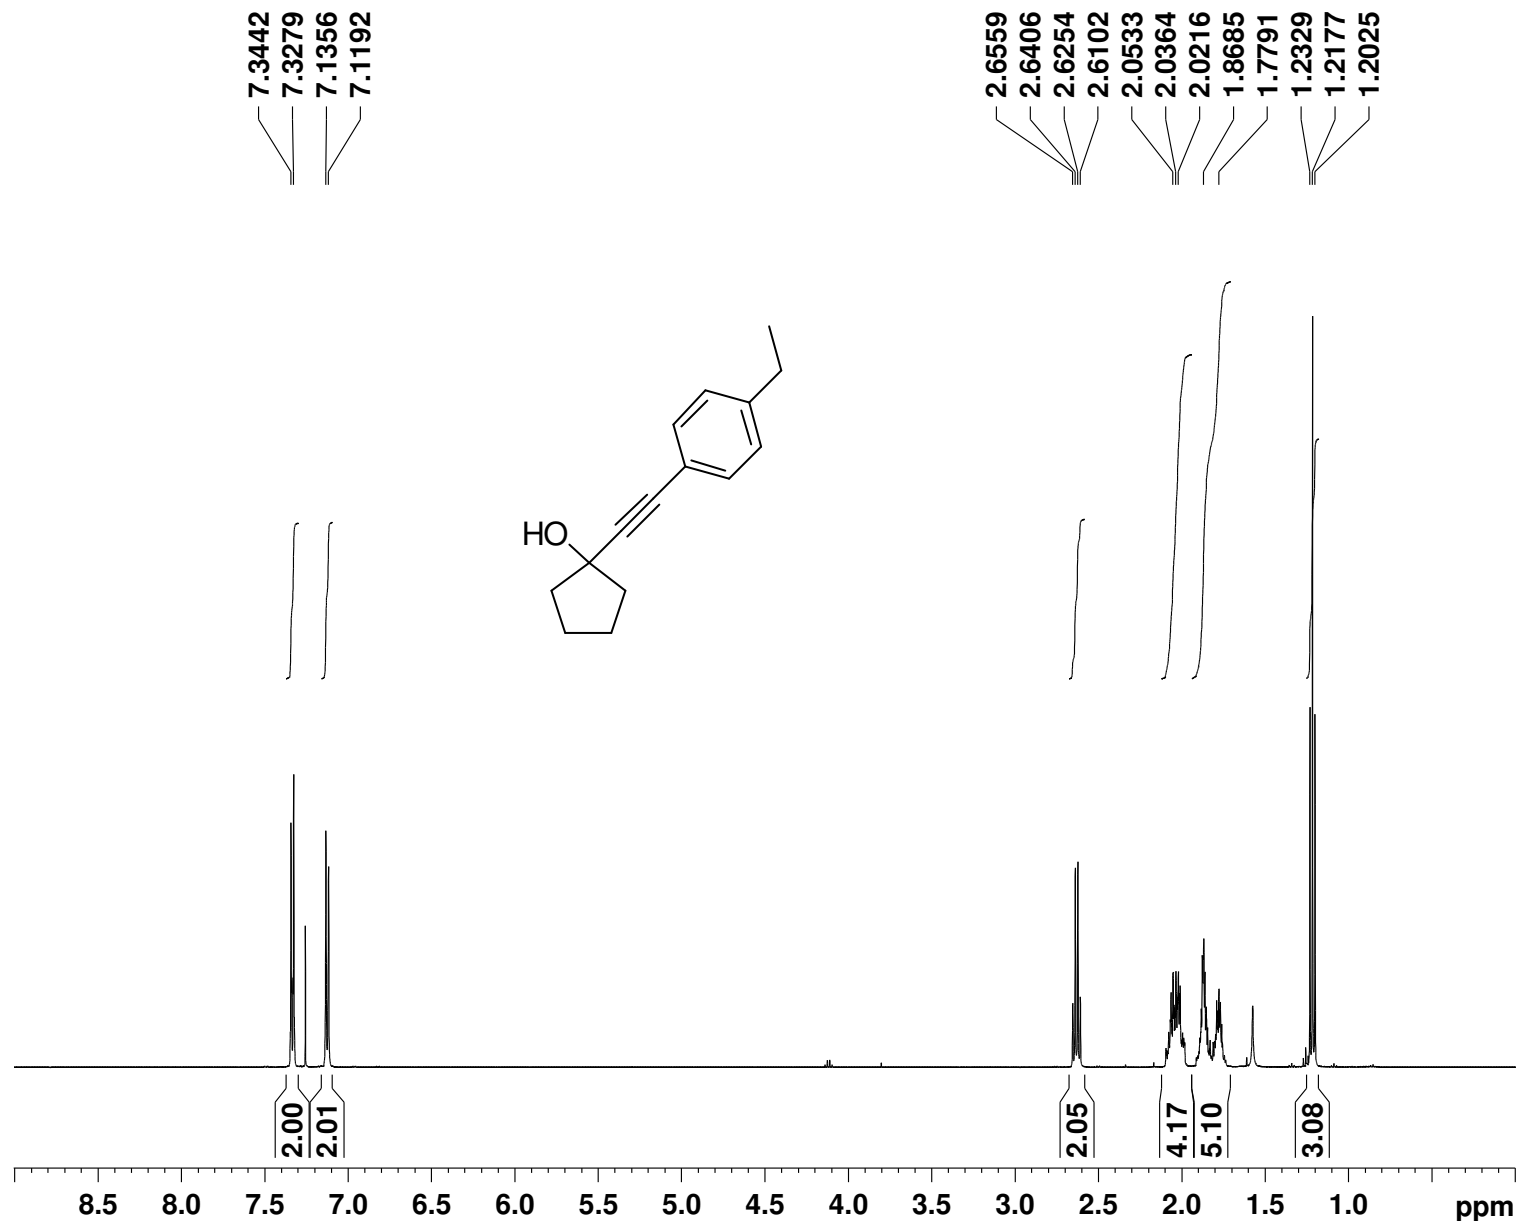

```
Current Data Parameters
NAME      ARM-1193
EXPNO     10
PROCNO    1

F2 - Acquisition Parameters
Date_     20120118
Time      14.14
INSTRUM   av500sgu
PROBHD    5 mm PABBO BB-
PULPROG   zg30
TD        65536
SOLVENT   CDCl3
NS        16
DS        2
SWH       10330.578 Hz
FIDRES    0.157632 Hz
AQ        3.1719923 sec
RG        322
DW        48.400 usec
DE        6.00 usec
TE        296.2 K
D1        1.00000000 sec
TDO       1

===== CHANNEL f1 =====
NUC1      1H
P1        9.70 usec
PL1       0.10 dB
PL1W     22.82879257 W
SFO1     500.1330885 MHz

F2 - Processing parameters
SI        32768
SF        500.1300144 MHz
WDW       EM
SSB       0
LB        0.30 Hz
GB        0
PC        1.00
```

### <sup>13</sup>C NMR spectrum for 1-((4-ethylphenyl)ethynyl)cyclopentanol 2f

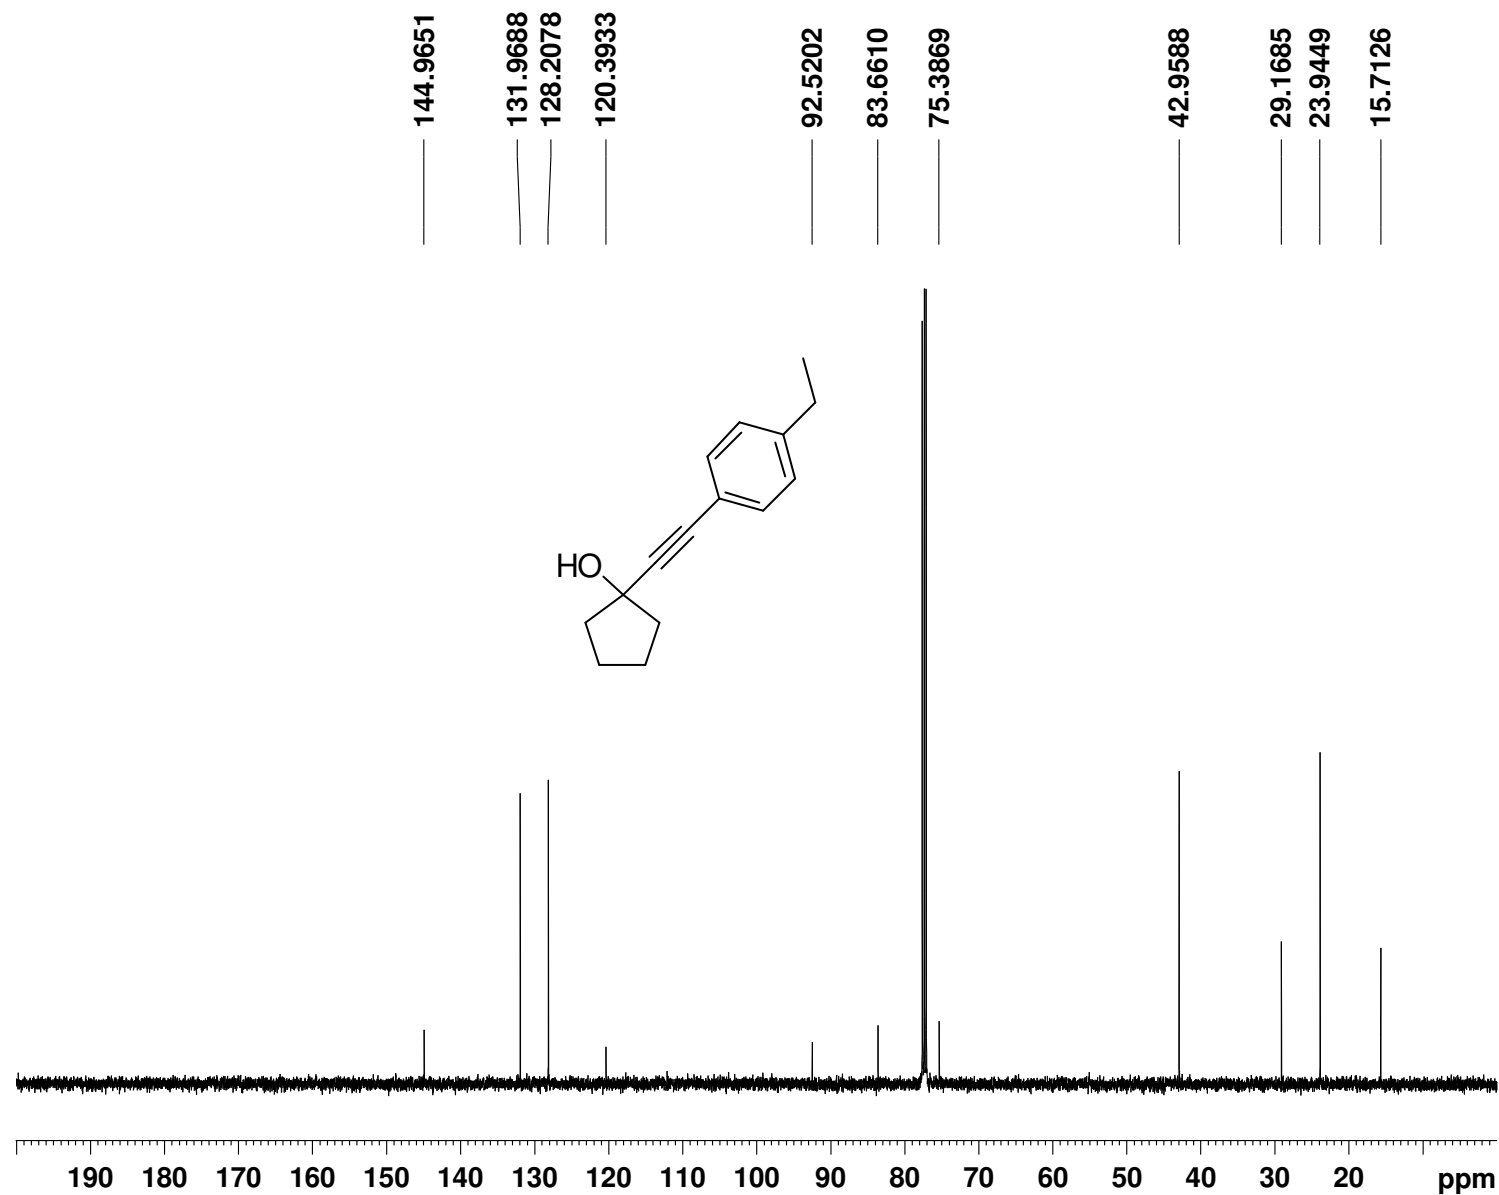

```
Current Data Parameters
NAME      ARM-1193
EXPNO     11
PROCNO    1

F2 - Acquisition Parameters
Date_     20120118
Time      14.17
INSTRUM   av500sgu
PROBHD    5 mm PABBO BB-
PULPROG   zgpg30
TD        65536
SOLVENT   CDCl3
NS        256
DS        4
SWH       30030.029 Hz
FIDRES    0.458222 Hz
AQ        1.0912244 sec
RG        14600
DW        16.650 usec
DE        6.00 usec
TE        297.3 K
D1        2.00000000 sec
D11       0.03000000 sec
TD0       8

===== CHANNEL f1 =====
NUC1      13C
P1        9.00 usec
PL1       0.00 dB
SFO1     125.7703637 MHz

===== CHANNEL f2 =====
CPDPRG2   waltz16
NUC2      1H
PCPD2     80.00 usec
PL2       0.00 dB
PL12     18.00 dB
PL13     18.00 dB
PL2W     23.36054420 W
PL12W    0.37023968 W
PL13W    0.37023968 W
SFO2     500.1320005 MHz

F2 - Processing parameters
SI        32768
SF        125.7577420 MHz
WDW       EM
SSB       0
LB        1.00 Hz
GB        0
PC        1.40
```

# <sup>1</sup>H NMR spectrum for 1-((4-butylphenyl)ethynyl)cyclopentanol 2g

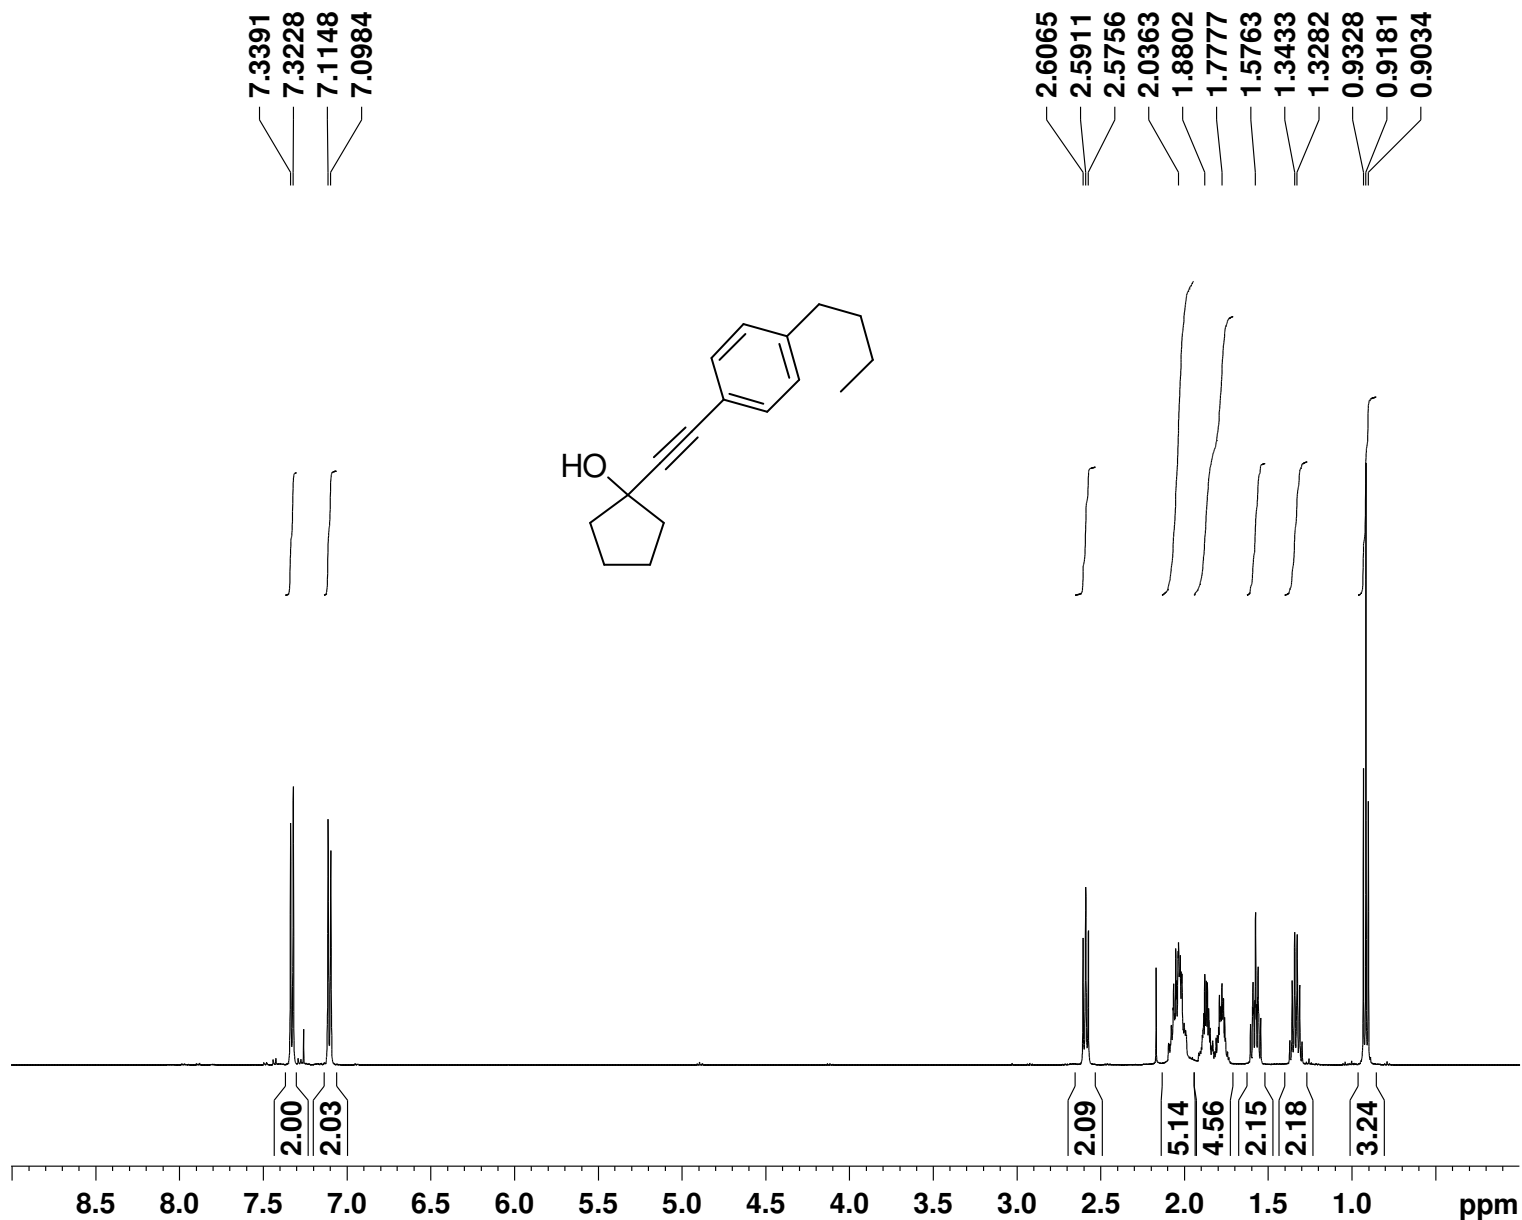

Current Data Parameters  
NAME ARM-1179  
EXPNO 10  
PROCNO 1

F2 - Acquisition Parameters  
Date\_ 20120119  
Time 8.49  
INSTRUM av500sgu  
PROBHD 5 mm PABBO BB-  
PULPROG zg30  
TD 65536  
SOLVENT CDCl3  
NS 16  
DS 2  
SWH 10330.578 Hz  
FIDRES 0.157632 Hz  
AQ 3.1719923 sec  
RG 64  
DW 48.400 usec  
DE 6.00 usec  
TE 296.5 K  
D1 1.00000000 sec  
TD0 1

===== CHANNEL f1 =====  
NUC1 1H  
P1 9.70 usec  
PL1 0.10 dB  
PL1W 22.82879257 W  
SFO1 500.1330885 MHz

F2 - Processing parameters  
SI 32768  
SF 500.1300130 MHz  
WDW EM  
SSB 0  
LB 0.30 Hz  
GB 0  
PC 1.00

### <sup>13</sup>C NMR spectrum for 1-((4-butylphenyl)ethynyl)cyclopentanol 2g

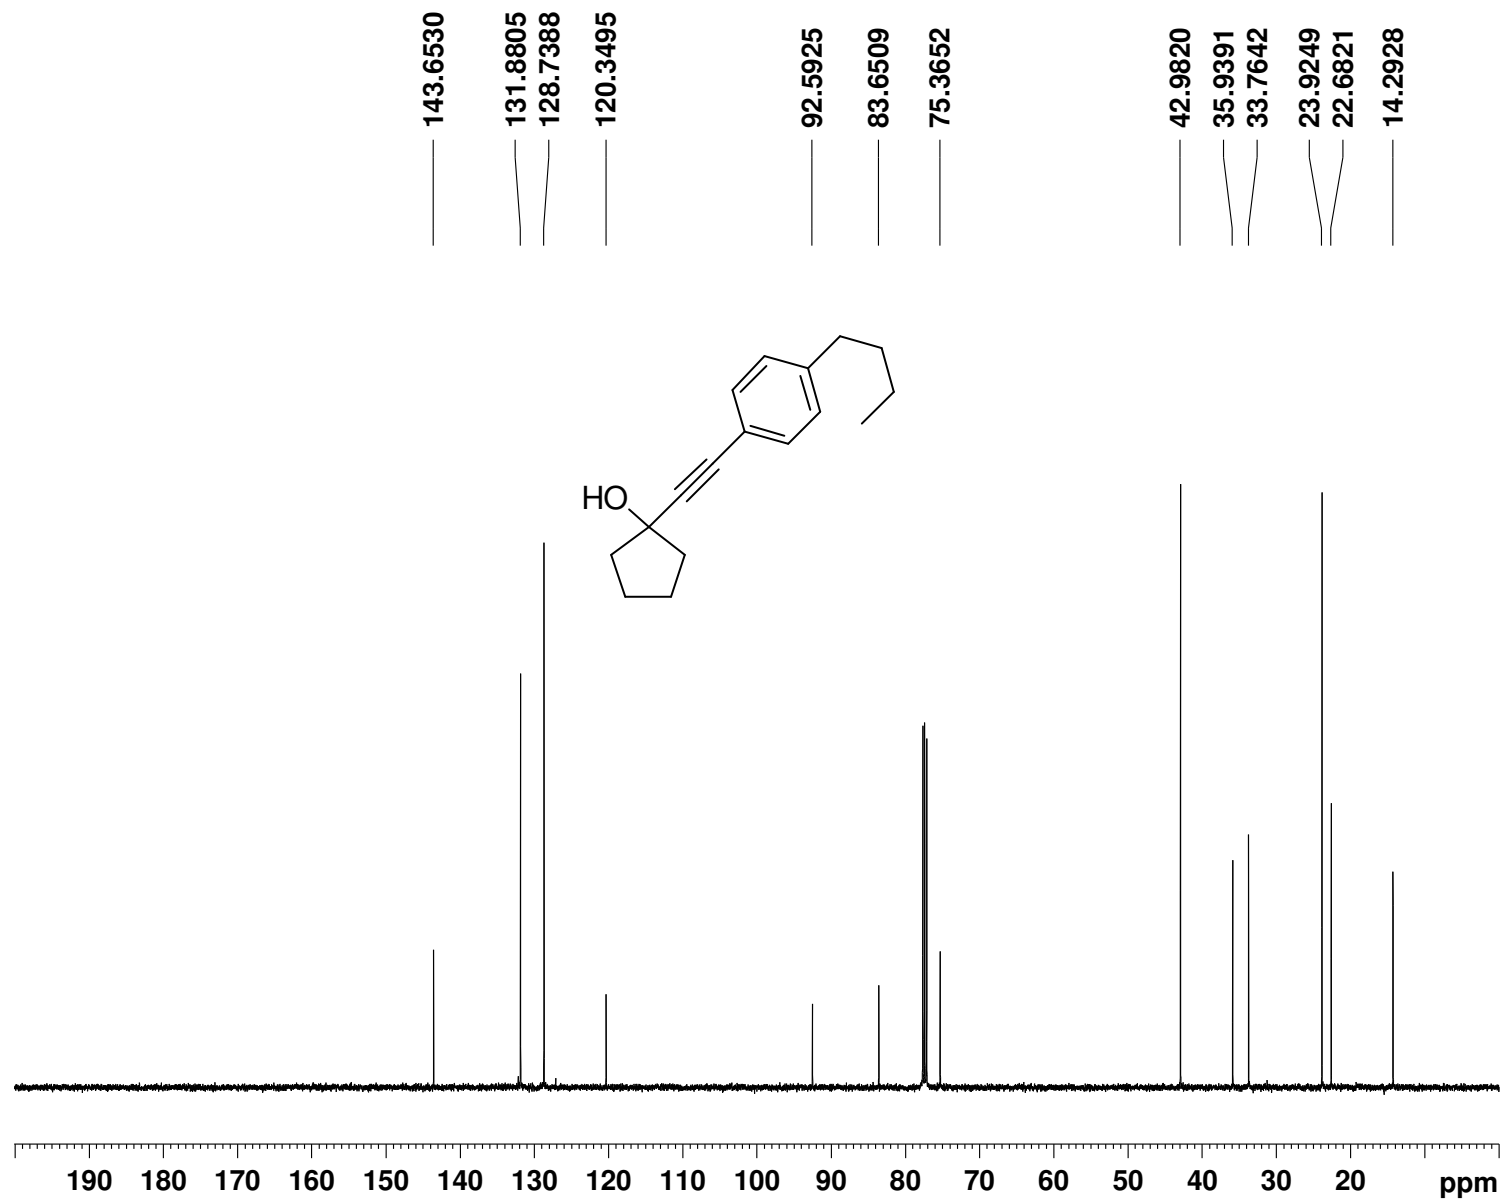

Current Data Parameters  
NAME ARM-1179  
EXPNO 11  
PROCNO 1

F2 - Acquisition Parameters  
Date\_ 20120119  
Time 8.52  
INSTRUM av500sgu  
PROBHD 5 mm PABBO BB-  
PULPROG zgpg30  
TD 65536  
SOLVENT CDC13  
NS 256  
DS 4  
SWH 30030.029 Hz  
FIDRES 0.458222 Hz  
AQ 1.0912244 sec  
RG 14600  
DW 16.650 usec  
DE 6.00 usec  
TE 297.7 K  
D1 2.00000000 sec  
D11 0.03000000 sec  
TD0 8

==== CHANNEL f1 =====  
NUC1 13C  
P1 9.00 usec  
PL1 0.00 dB  
SFO1 125.7703637 MHz

==== CHANNEL f2 =====  
CPDPRG2 waltz16  
NUC2 1H  
PCPD2 80.00 usec  
PL2 0.00 dB  
PL12 18.00 dB  
PL13 18.00 dB  
PL2W 23.36054420 W  
PL12W 0.37023968 W  
PL13W 0.37023968 W  
SFO2 500.1320005 MHz

F2 - Processing parameters  
SI 32768  
SF 125.7577447 MHz  
WDW EM  
SSB 0  
LB 1.00 Hz  
GB 0  
PC 1.40



### <sup>1</sup>H NMR spectrum for 1-((4-methoxyphenyl)ethynyl)cyclopentanol 2h

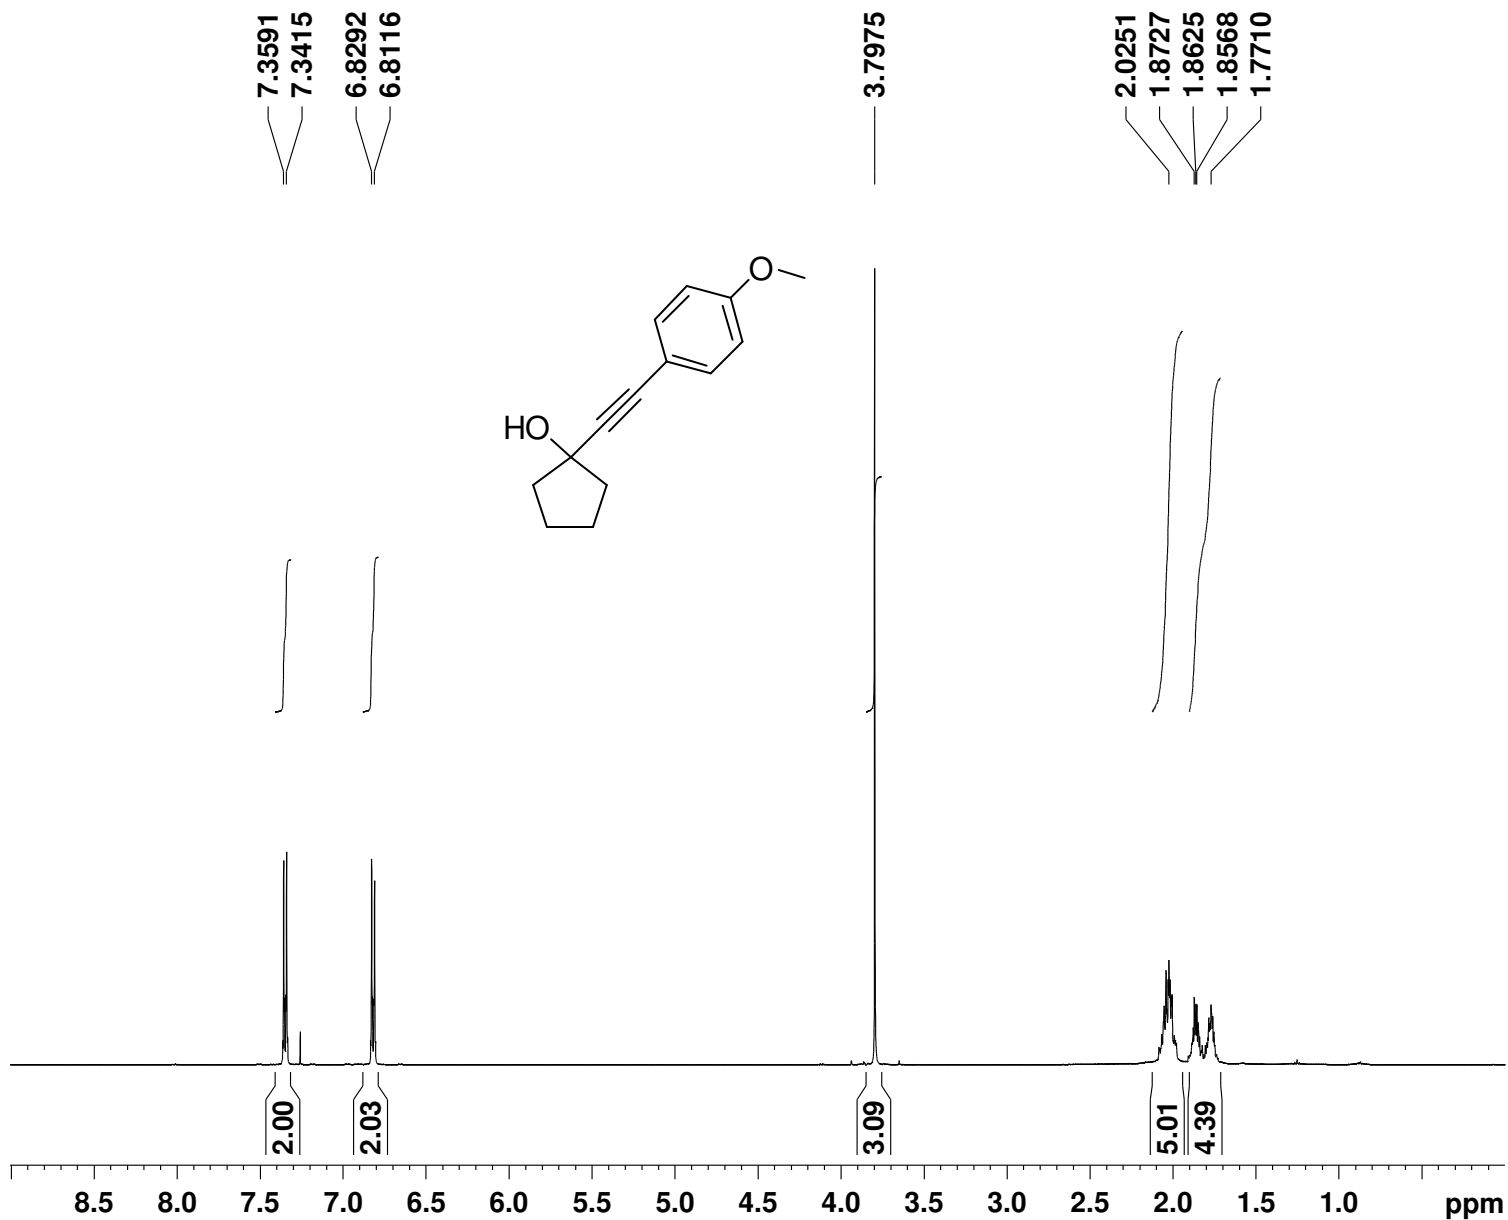

Current Data Parameters  
NAME ARM-1188  
EXPNO 10  
PROCNO 1

F2 - Acquisition Parameters  
Date\_ 20120119  
Time 12.58  
INSTRUM av500sgu  
PROBHD 5 mm PABBO BB-  
PULPROG zg30  
TD 65536  
SOLVENT CDCl3  
NS 16  
DS 2  
SWH 10330.578 Hz  
FIDRES 0.157632 Hz  
AQ 3.1719923 sec  
RG 144  
DW 48.400 usec  
DE 6.00 usec  
TE 296.4 K  
D1 1.00000000 sec  
TD0 1

===== CHANNEL f1 =====  
NUC1 1H  
P1 9.70 usec  
PL1 0.10 dB  
PL1W 22.82879257 W  
SFO1 500.1330885 MHz

F2 - Processing parameters  
SI 32768  
SF 500.1300134 MHz  
WDW EM  
SSB 0  
LB 0.30 Hz  
GB 0  
PC 1.00

### <sup>13</sup>C NMR spectrum for 1-((4-methoxyphenyl)ethynyl)cyclopentanol 2h

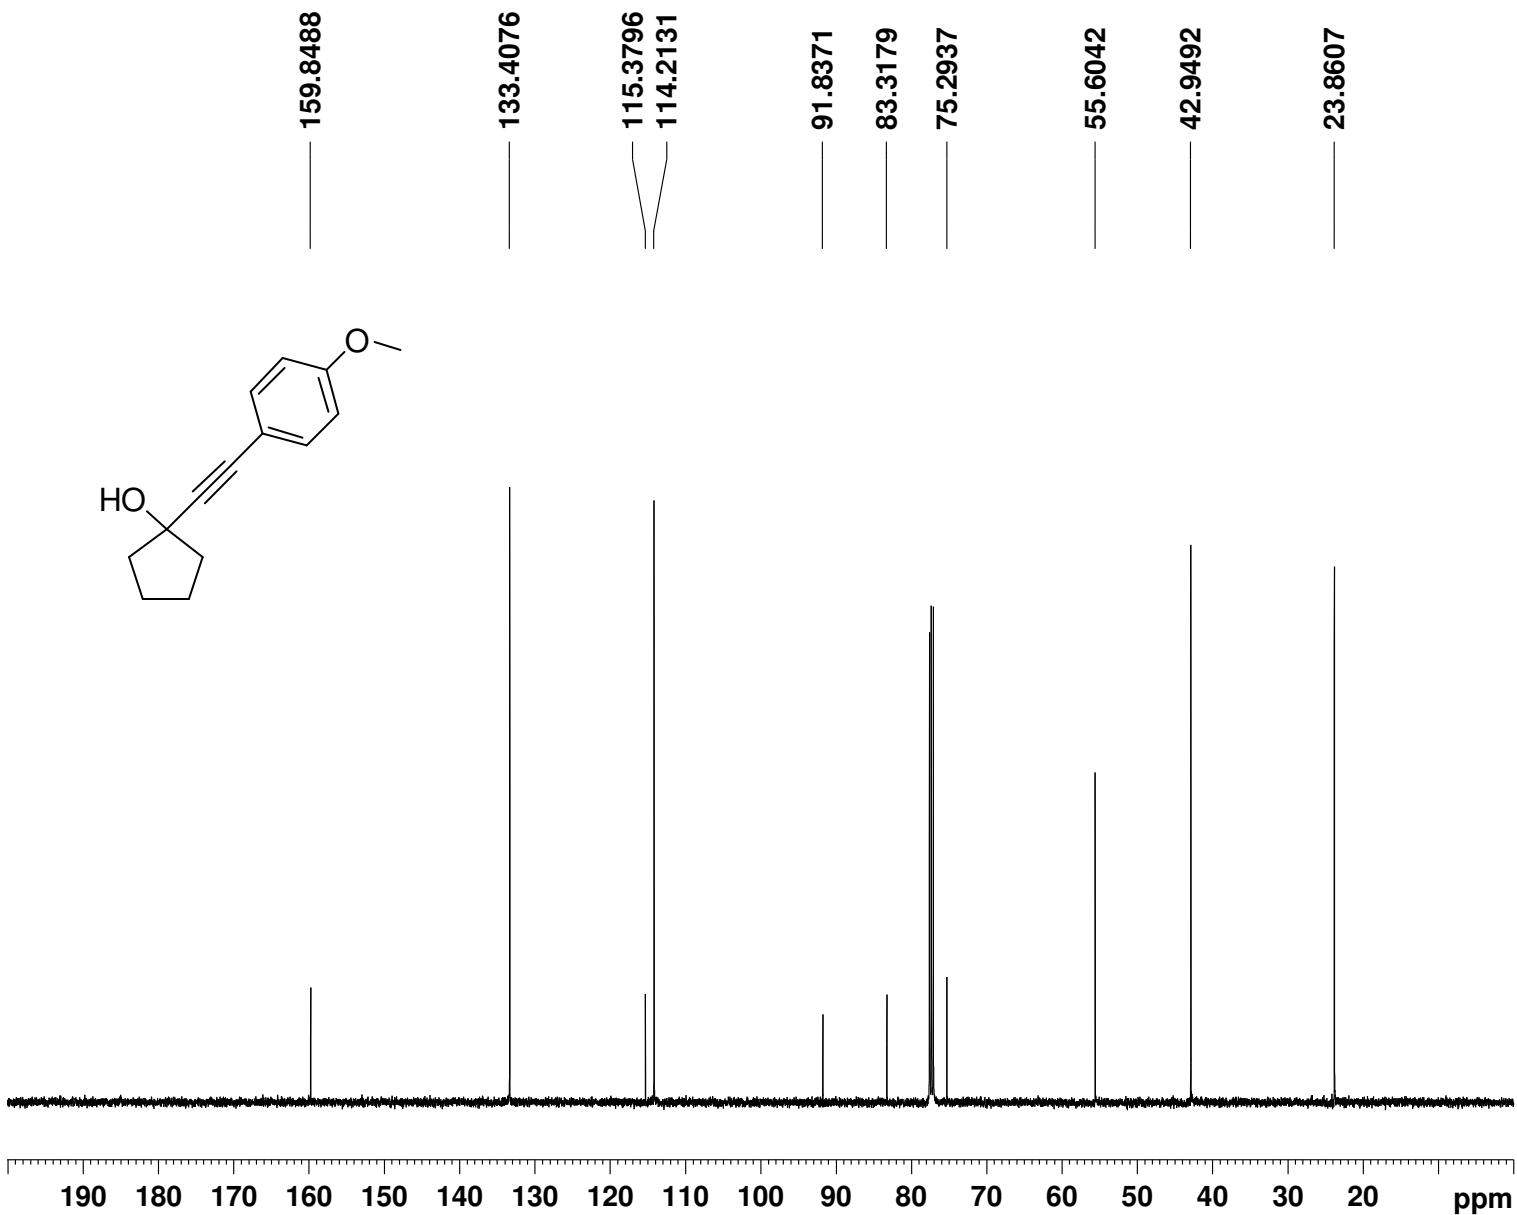

Current Data Parameters  
NAME ARM-1188  
EXPNO 11  
PROCNO 1

F2 - Acquisition Parameters  
Date\_ 20120119  
Time 13.00  
INSTRUM av500sq  
PROBHD 5 mm PABBO BB-  
PULPROG zgpg30  
TD 65536  
SOLVENT CDCl3  
NS 256  
DS 4  
SWH 30030.029 Hz  
FIDRES 0.458222 Hz  
AQ 1.0912244 sec  
RG 14600  
DW 16.650 usec  
DE 6.00 usec  
TE 297.5 K  
D1 2.0000000 sec  
D11 0.0300000 sec  
TD0 8

==== CHANNEL f1 =====  
NUC1 13C  
P1 9.00 usec  
PL1 0.00 dB  
SFO1 125.7703637 MHz

==== CHANNEL f2 =====  
CPDPRG2 waltz16  
NUC2 1H  
PCPD2 80.00 usec  
PL2 0.00 dB  
PL12 18.00 dB  
PL13 18.00 dB  
PL2W 23.36054420 W  
PL12W 0.37023968 W  
PL13W 0.37023968 W  
SFO2 500.1320005 MHz

F2 - Processing parameters  
SI 32768  
SF 125.7577482 MHz  
WDW EM  
SSB 0  
LB 1.00 Hz  
GB 0  
PC 1.40

### <sup>1</sup>H NMR spectrum for 1-((4-(pentyloxy)phenyl)ethynyl)cyclopentanol 2i

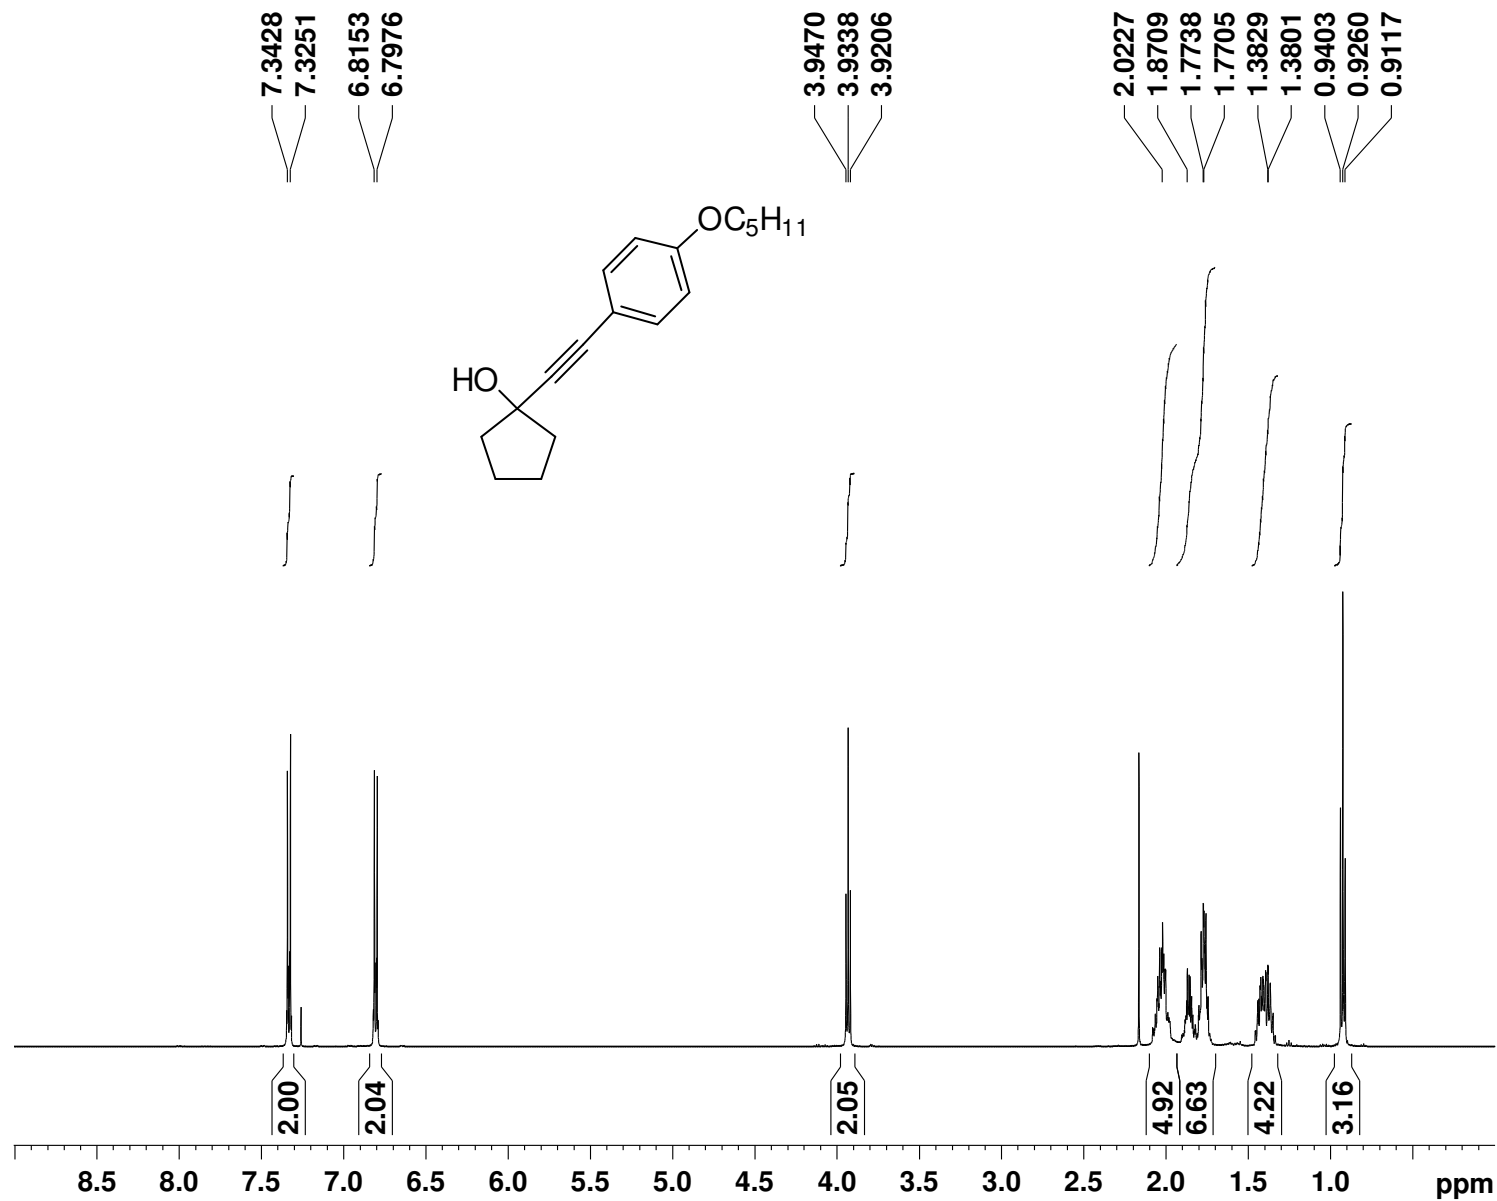

Current Data Parameters  
NAME ARM-1189  
EXPNO 10  
PROCNO 1

F2 - Acquisition Parameters  
Date\_ 20120119  
Time 13.41  
INSTRUM av500squ  
PROBHD 5 mm PABBO BB-  
PULPROG zg30  
TD 65536  
SOLVENT CDC13  
NS 16  
DS 2  
SWH 10330.578 Hz  
FIDRES 0.157632 Hz  
AQ 3.1719923 sec  
RG 114  
DW 48.400 usec  
DE 6.00 usec  
TE 296.5 K  
D1 1.00000000 sec  
TDO 1

===== CHANNEL f1 =====  
NUC1 1H  
P1 9.70 usec  
PL1 0.10 dB  
PL1W 22.82879257 W  
SFO1 500.1330885 MHz

F2 - Processing parameters  
SI 32768  
SF 500.1300133 MHz  
WDW EM  
SSB 0  
LB 0.30 Hz  
GB 0  
PC 1.00

### <sup>13</sup>C NMR spectrum for 1-((4-(pentyloxy)phenyl)ethynyl)cyclopentanol 2i

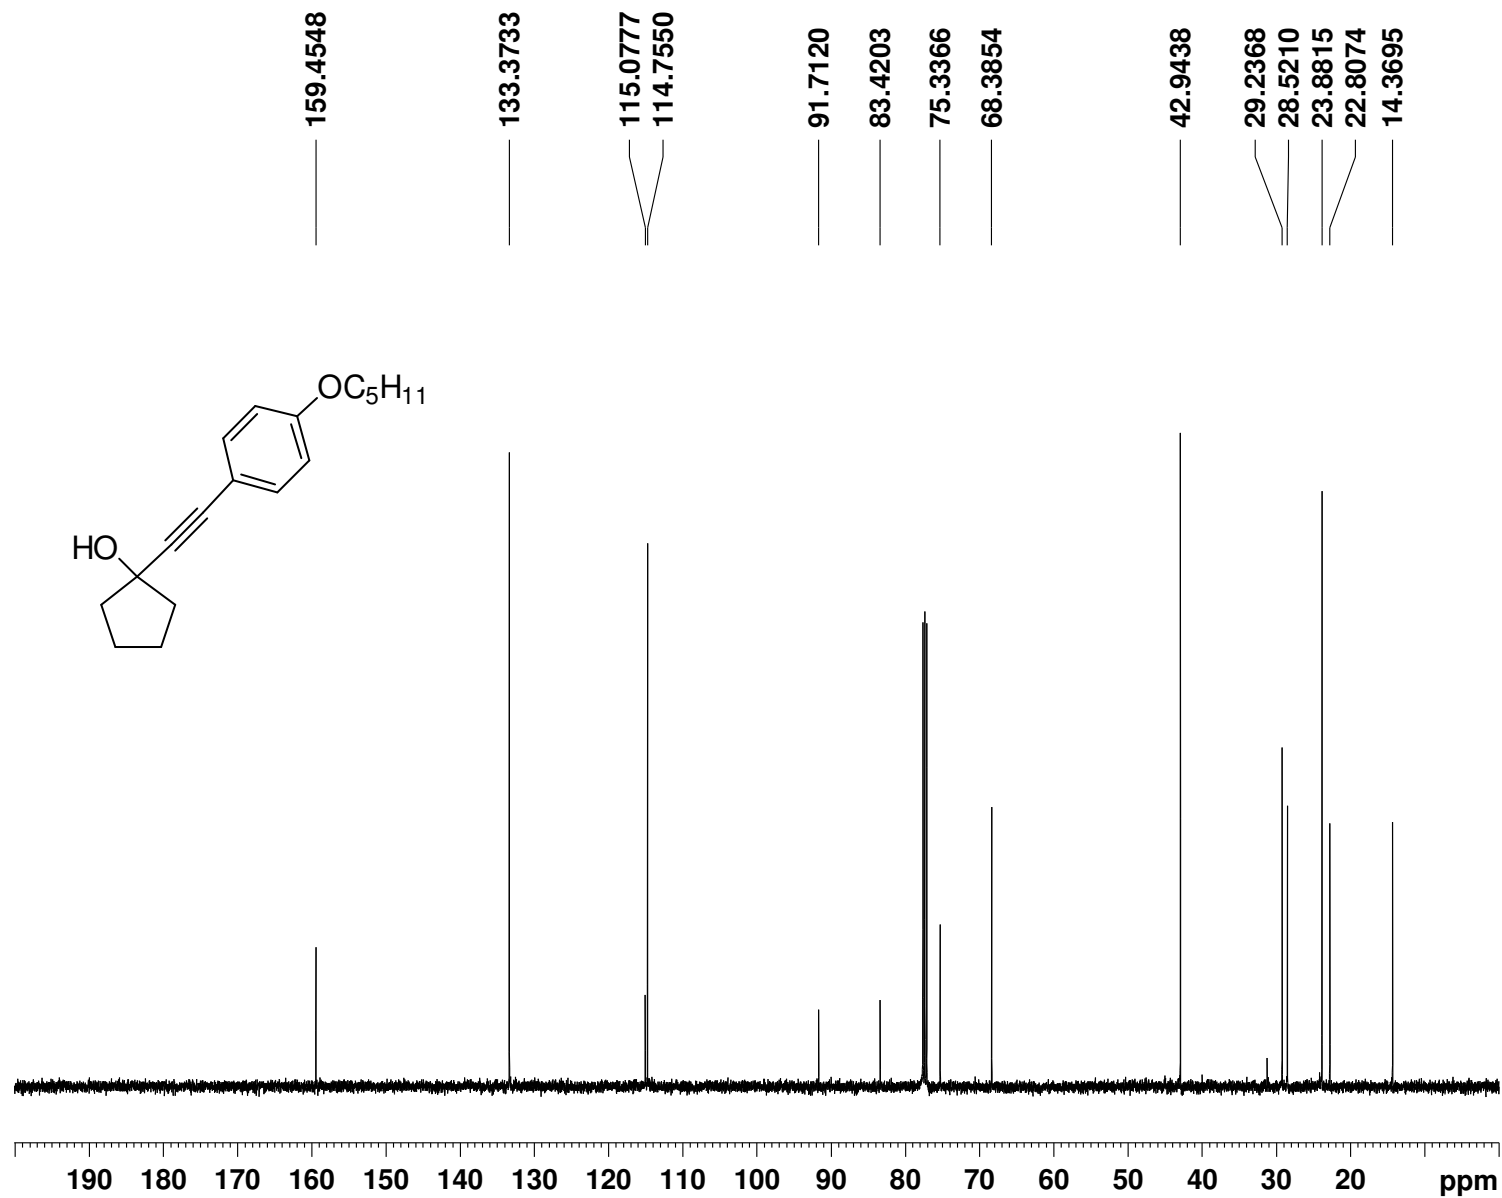

Current Data Parameters  
NAME ARM-1189  
EXPNO 11  
PROCNO 1

F2 - Acquisition Parameters  
Date\_ 20120119  
Time 13.43  
INSTRUM av500sgu  
PROBHD 5 mm PABBO BB-  
PULPROG zgpg30  
TD 65536  
SOLVENT CDC13  
NS 128  
DS 4  
SWH 30030.029 Hz  
FIDRES 0.458222 Hz  
AQ 1.0912244 sec  
RG 14600  
DW 16.650 usec  
DE 6.00 usec  
TE 297.6 K  
D1 2.00000000 sec  
D11 0.03000000 sec  
TD0 8

==== CHANNEL f1 =====  
NUC1 13C  
P1 9.00 usec  
PL1 0.00 dB  
SFO1 125.7703637 MHz

==== CHANNEL f2 =====  
CPDPRG2 waltz16  
NUC2 1H  
PCPD2 80.00 usec  
PL2 0.00 dB  
PL12 18.00 dB  
PL13 18.00 dB  
PL2W 23.36054420 W  
PL12W 0.37023968 W  
PL13W 0.37023968 W  
SFO2 500.1320005 MHz

F2 - Processing parameters  
SI 32768  
SF 125.7577453 MHz  
WDW EM  
SSB 0  
LB 1.00 Hz  
GB 0  
PC 1.40

# <sup>1</sup>H NMR spectrum for 1-((3-fluorophenyl)ethynyl)cyclopentanol 2j

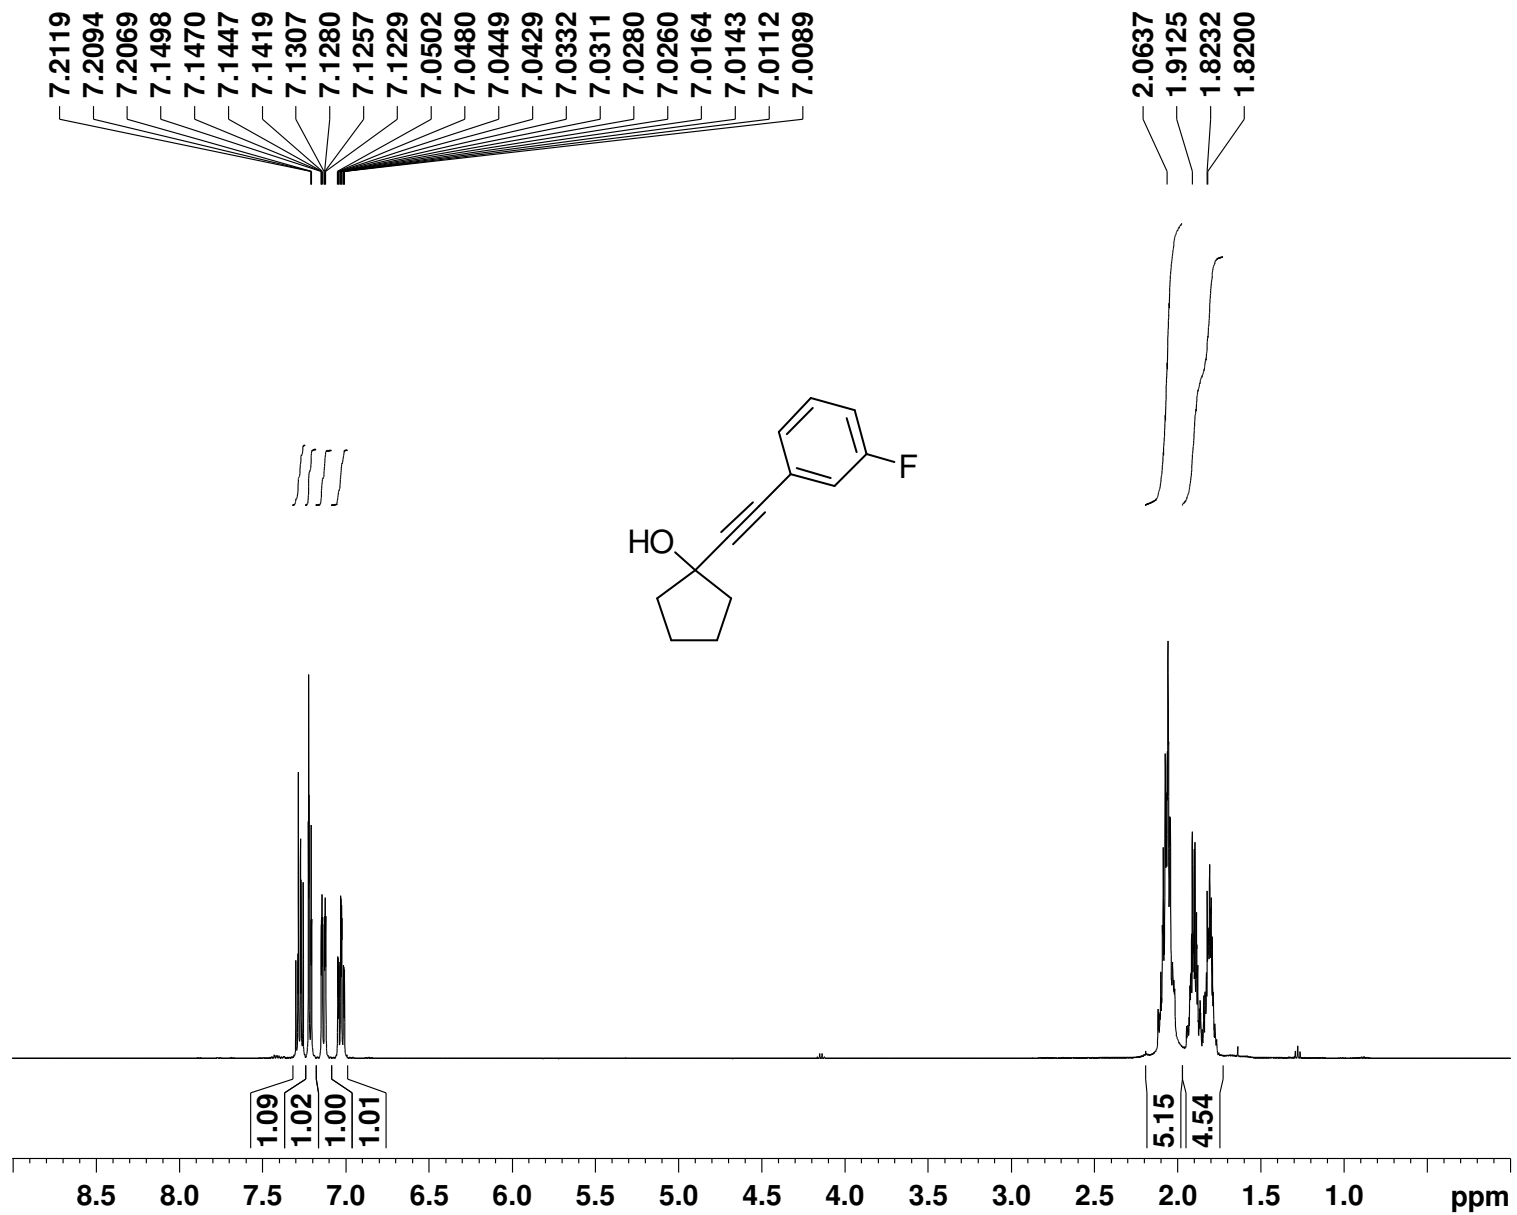

Current Data Parameters  
NAME ARM-1204  
EXPNO 10  
PROCNO 1

F2 - Acquisition Parameters  
Date\_ 20120119  
Time 9.22  
INSTRUM av500sgu  
PROBHD 5 mm PABBO BB-  
PULPROG zg30  
TD 65536  
SOLVENT CDC13  
NS 16  
DS 2  
SWH 10330.578 Hz  
FIDRES 0.157632 Hz  
AQ 3.1719923 sec  
RG 144  
DW 48.400 usec  
DE 6.00 usec  
TE 296.7 K  
D1 1.0000000 sec  
TDO 1

===== CHANNEL f1 =====  
NUC1 1H  
P1 9.70 usec  
PL1 0.10 dB  
PL1W 22.82879257 W  
SF01 500.1330885 MHz

F2 - Processing parameters  
SI 32768  
SF 500.1300000 MHz  
WDW EM  
SSB 0  
LB 0.30 Hz  
GB 0  
PC 1.00

### <sup>13</sup>C NMR spectrum for 1-((3-fluorophenyl)ethynyl)cyclopentanol 2j

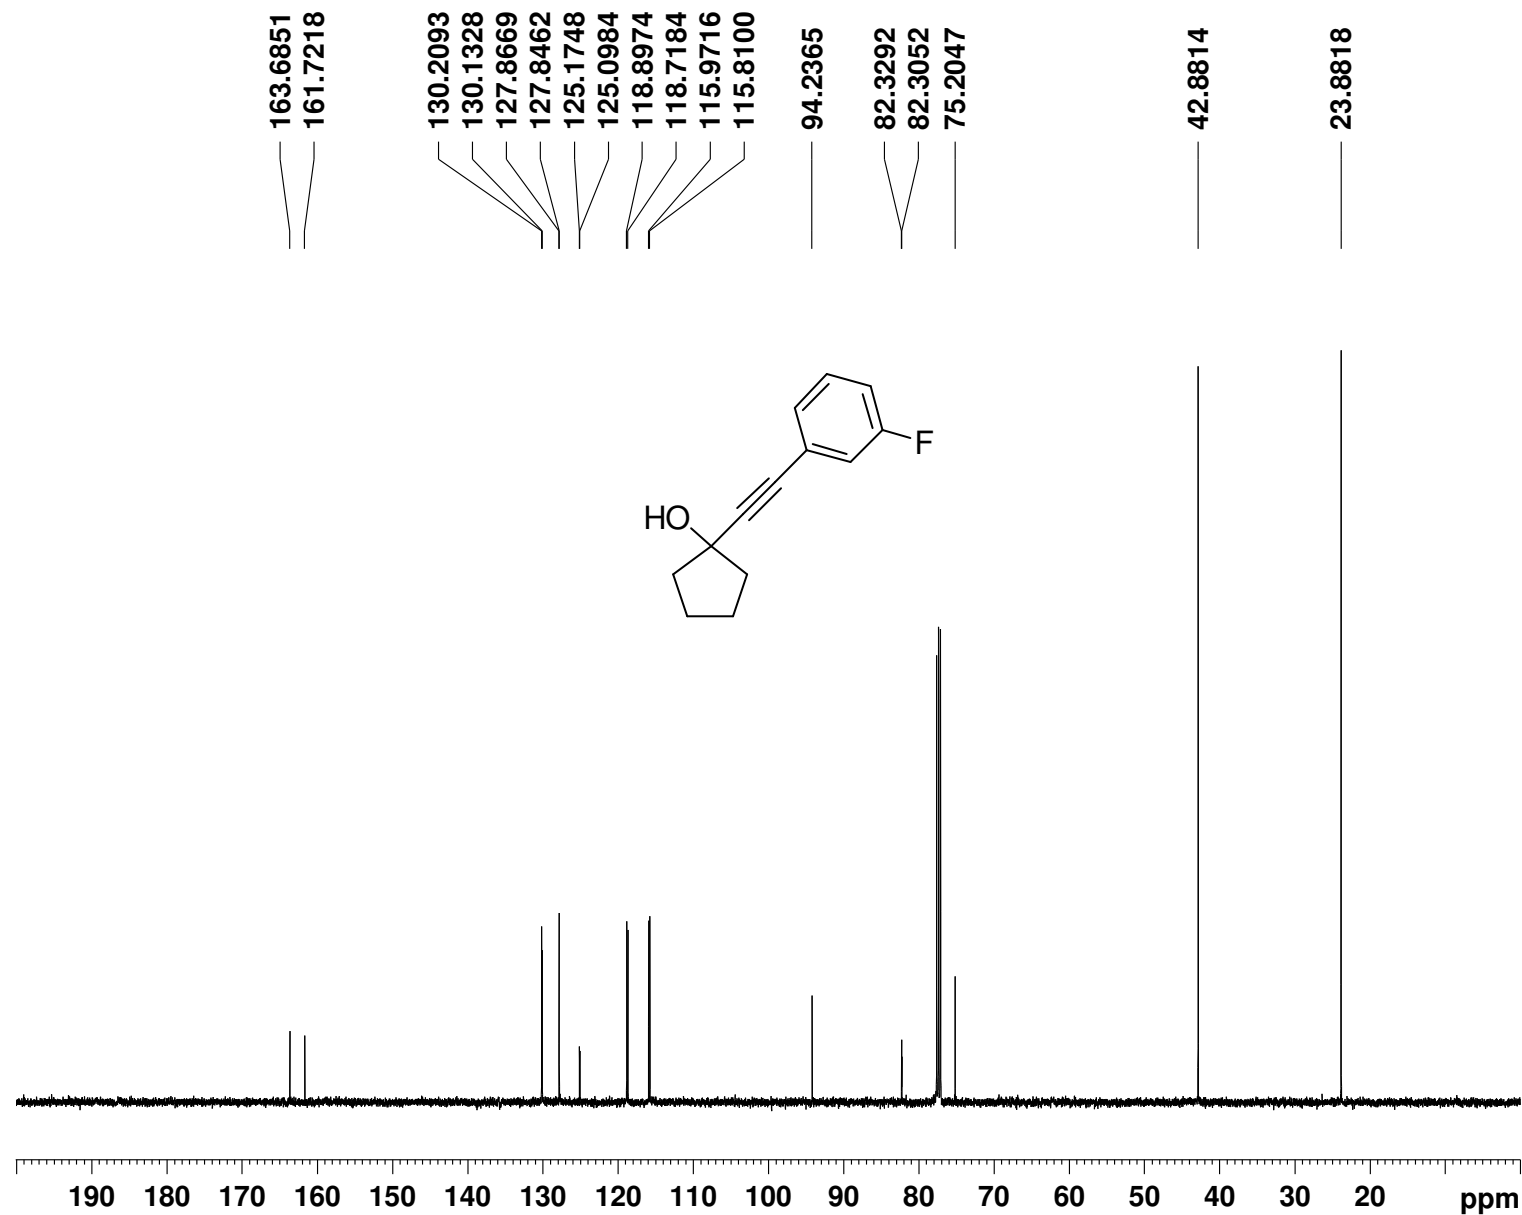

Current Data Parameters  
NAME ARM-1204  
EXPNO 11  
PROCNO 1

F2 - Acquisition Parameters  
Date\_ 20120119  
Time 9.24  
INSTRUM av500sgu  
PROBHD 5 mm PABBO BB-  
PULPROG zgpg30  
TD 65536  
SOLVENT CDCl3  
NS 256  
DS 4  
SWH 30030.029 Hz  
FIDRES 0.458222 Hz  
AQ 1.0912244 sec  
RG 14600  
DW 16.650 usec  
DE 6.00 usec  
TE 297.7 K  
D1 2.0000000 sec  
D11 0.0300000 sec  
TD0 8

==== CHANNEL f1 =====  
NUC1 13C  
P1 9.00 usec  
PL1 0.00 dB  
SF01 125.7703637 MHz

==== CHANNEL f2 =====  
CPDPRG2 waltz16  
NUC2 1H  
PCPD2 80.00 usec  
PL2 0.00 dB  
PL12 18.00 dB  
PL13 18.00 dB  
PL2W 23.36054420 W  
PL12W 0.37023968 W  
PL13W 0.37023968 W  
SF02 500.1320005 MHz

F2 - Processing parameters  
SI 32768  
SF 125.7577434 MHz  
WDW EM  
SSB 0  
LB 1.00 Hz  
GB 0  
PC 1.40

<sup>1</sup>H NMR spectrum for 1-((4-*tert*-butylphenyl)ethynyl)cyclohexanol 2k

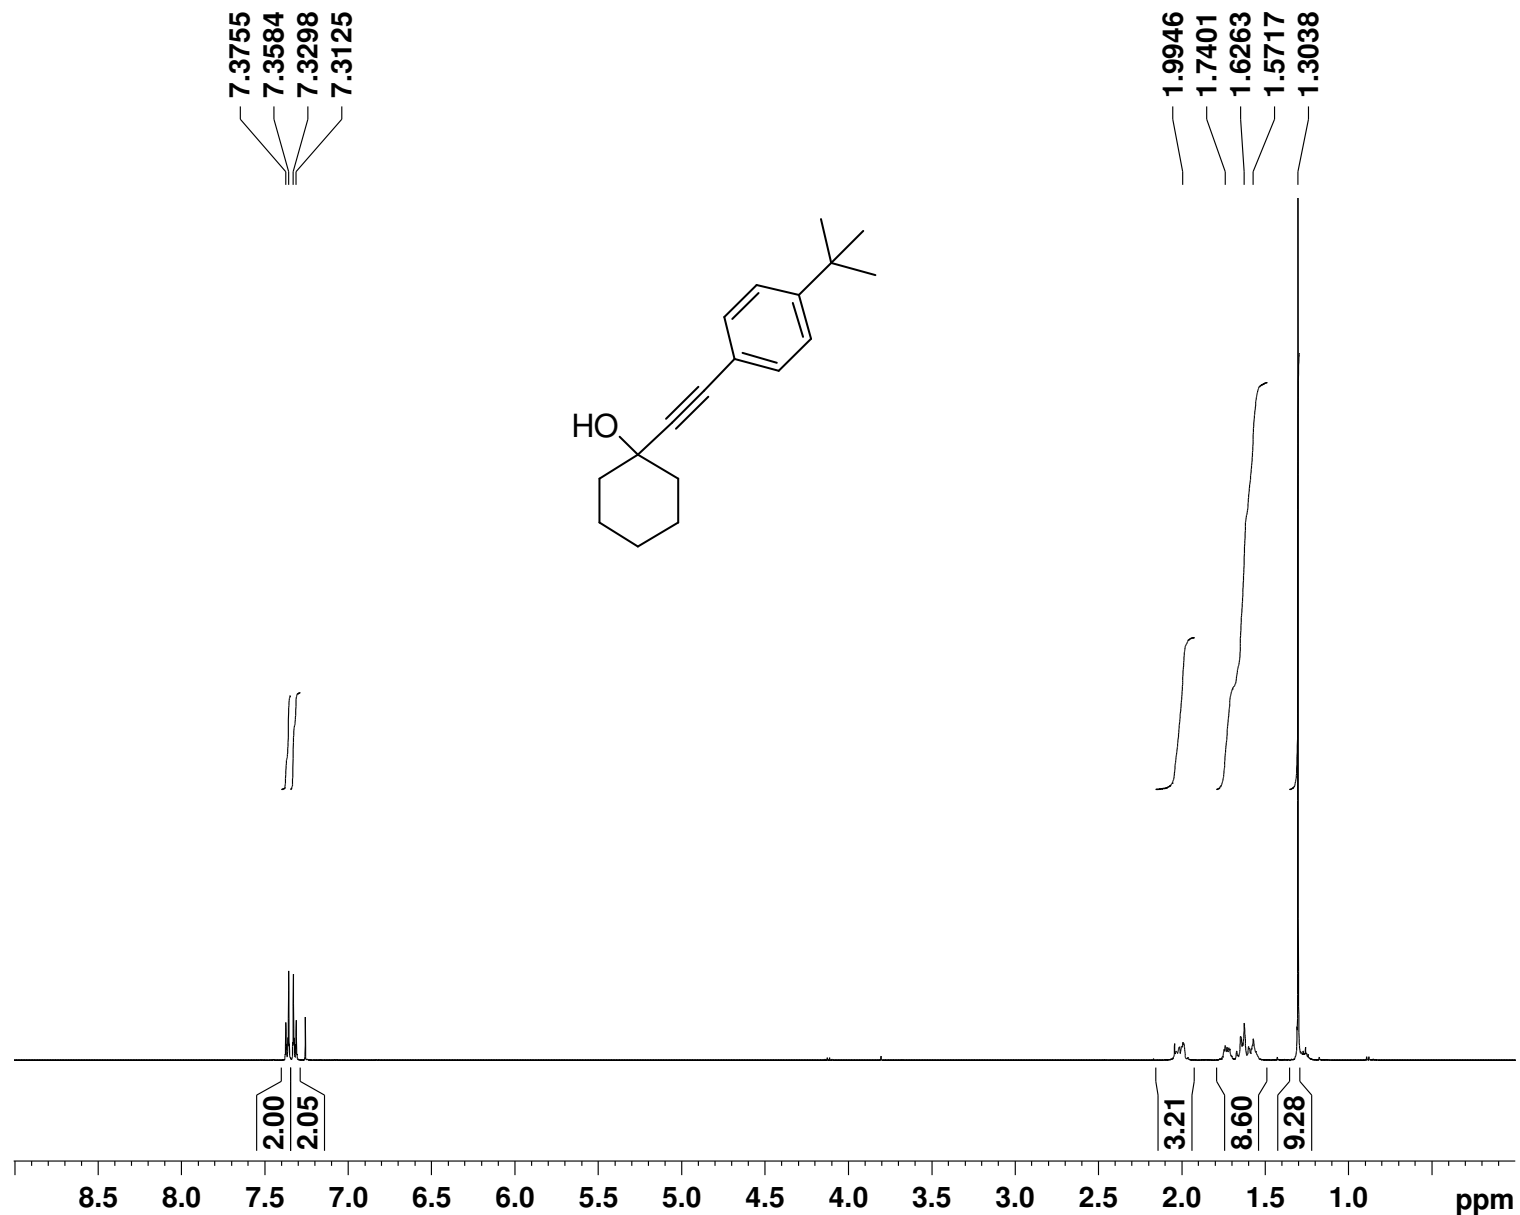

Current Data Parameters  
NAME ARM-1178  
EXPNO 10  
PROCNO 1

F2 - Acquisition Parameters  
Date\_ 20120119  
Time 14.09  
INSTRUM av500sgu  
PROBHD 5 mm PABBO BB-  
PULPROG zg30  
TD 65536  
SOLVENT CDCl3  
NS 16  
DS 2  
SWH 10330.578 Hz  
FIDRES 0.157632 Hz  
AQ 3.1719923 sec  
RG 406  
DW 48.400 usec  
DE 6.00 usec  
TE 296.5 K  
D1 1.00000000 sec  
TD0 1

===== CHANNEL f1 =====  
NUC1 1H  
P1 9.70 usec  
PL1 0.10 dB  
PL1W 22.82879257 W  
SFO1 500.1330885 MHz

F2 - Processing parameters  
SI 32768  
SF 500.1300140 MHz  
WDW EM  
SSB 0  
LB 0.30 Hz  
GB 0  
PC 1.00

### <sup>13</sup>C NMR spectrum for 1-((4-*tert*-butylphenyl)ethynyl)cyclohexanol 2k

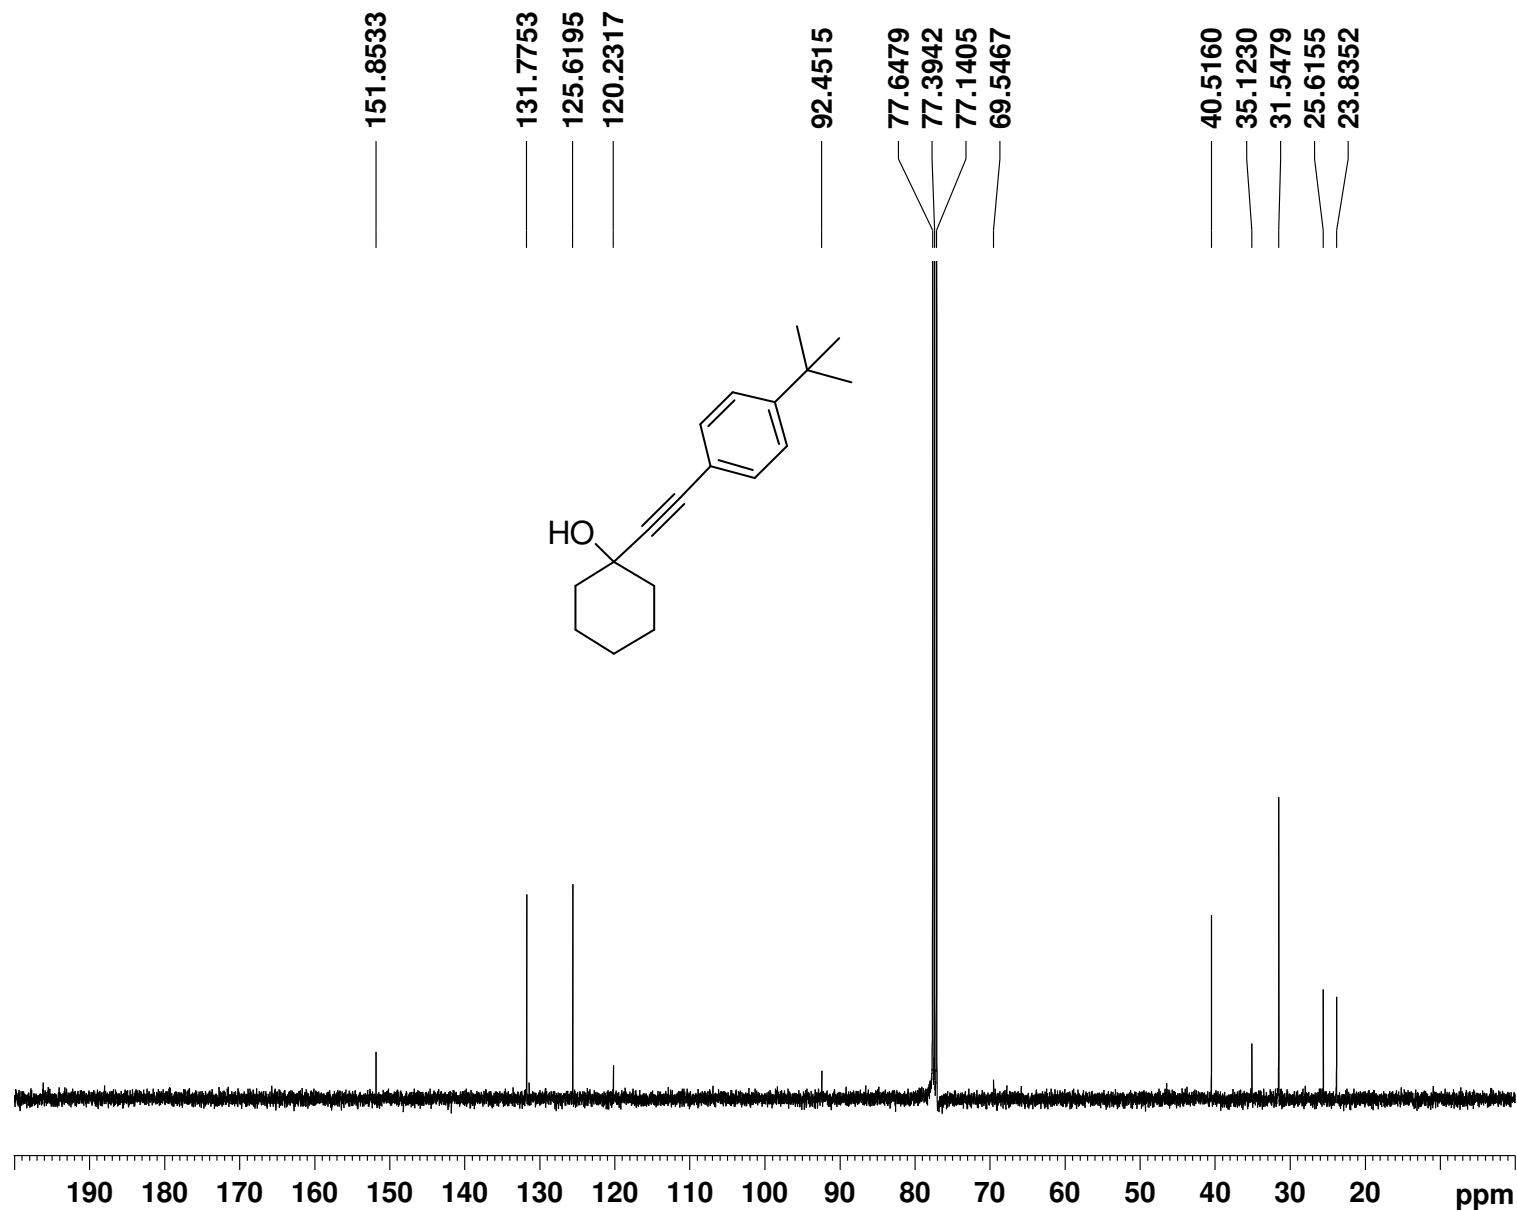

```
Current Data Parameters
NAME      ARM-1178
EXPNO    11
PROCNO   1

F2 - Acquisition Parameters
Date_    20120119
Time     14.11
INSTRUM  av500sgu
PROBHD   5 mm PABBO BB-
PULPROG  zgpg30
TD       65536
SOLVENT  CDCl3
NS       256
DS       4
SWH      30030.029 Hz
FIDRES   0.458222 Hz
AQ       1.0912244 sec
RG       14600
DW       16.650 usec
DE       6.00 usec
TE       297.6 K
D1       2.0000000 sec
D11      0.0300000 sec
TDO      8

===== CHANNEL f1 =====
NUC1     13C
P1       9.00 usec
PL1      0.00 dB
SFO1    125.7703637 MHz

===== CHANNEL f2 =====
CPDPRG2  waltz16
NUC2     1H
PCPD2    80.00 usec
PL2      0.00 dB
PL12     18.00 dB
PL13     18.00 dB
PL2W     23.36054420 W
PL12W    0.37023968 W
PL13W    0.37023968 W
SFO2    500.1320005 MHz

F2 - Processing parameters
SI       32768
SF       125.7577426 MHz
WDW      EM
SSB      0
LB       1.00 Hz
GB       0
PC       1.40
```



# <sup>1</sup>H NMR spectrum for 1-((4-*tert*-butylphenyl)ethynyl)cycloheptanol 2m

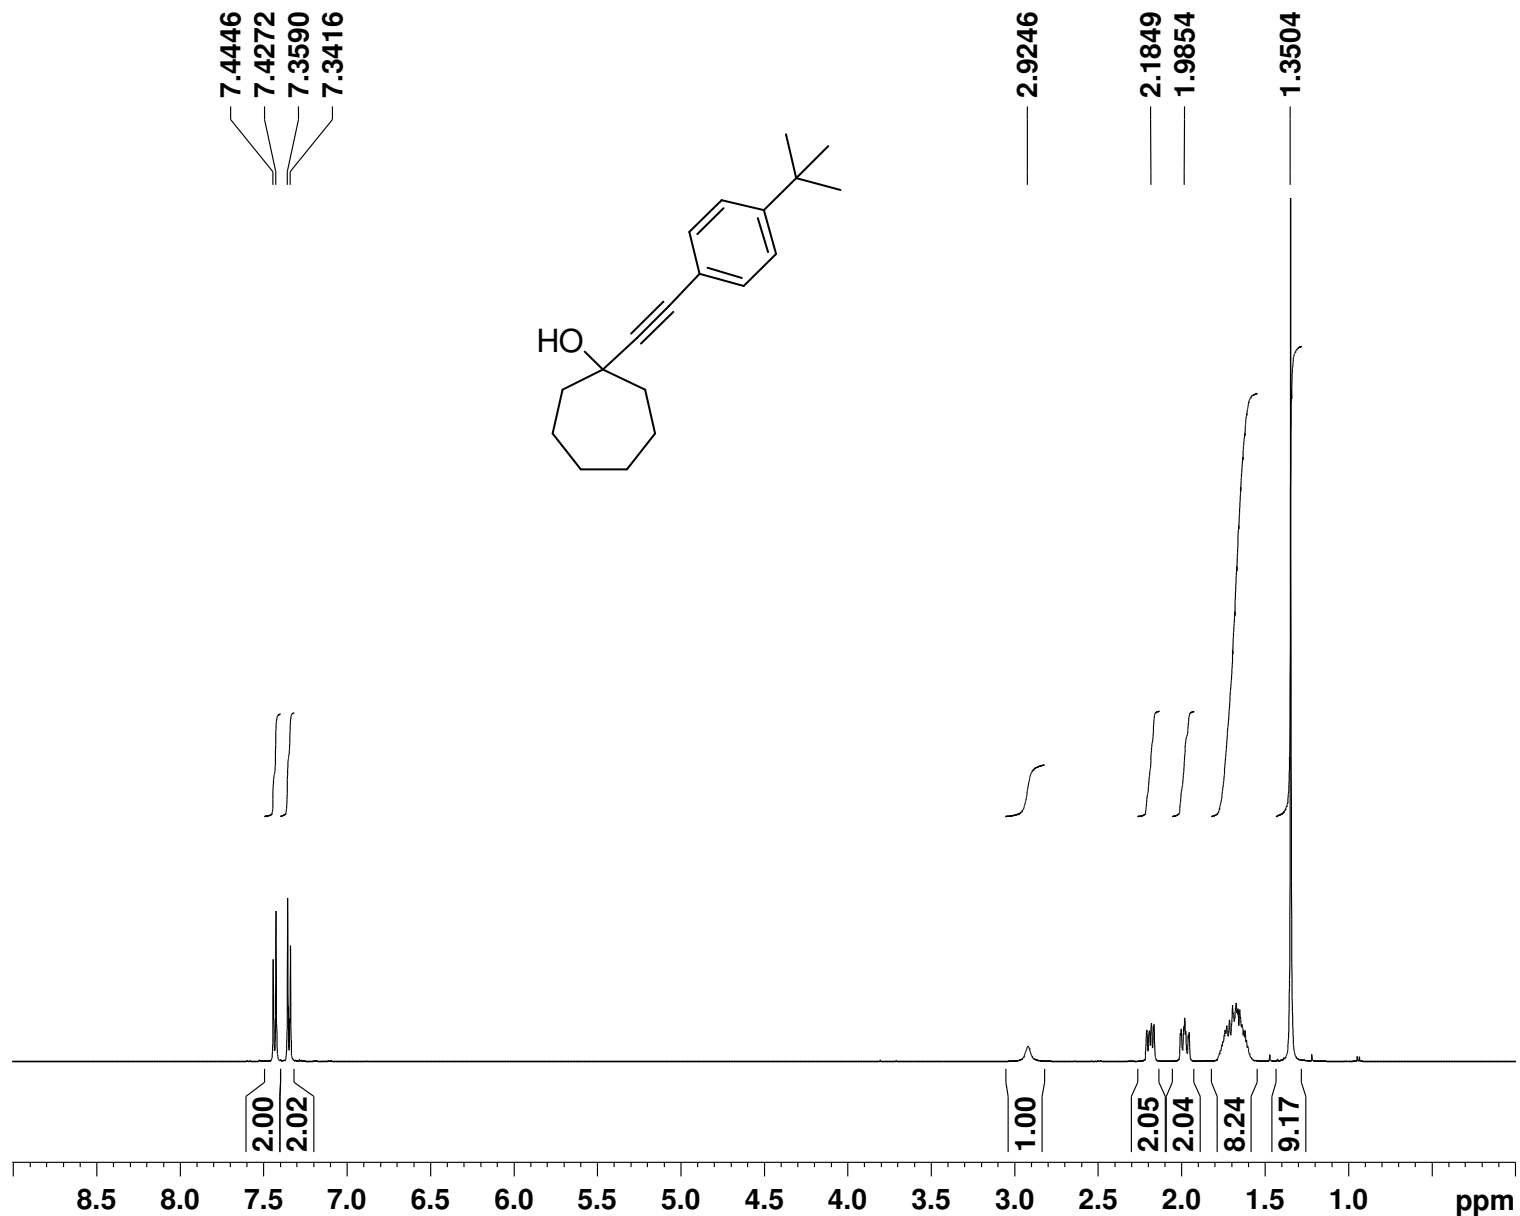

Current Data Parameters  
NAME ARM-1205\_3  
EXPNO 10  
PROCNO 1

F2 - Acquisition Parameters  
Date\_ 20120130  
Time 11.23  
INSTRUM av500sgu  
PROBHD 5 mm PABBO BB-  
PULPROG zg30  
TD 65536  
SOLVENT CDCl3  
NS 16  
DS 2  
SWH 10330.578 Hz  
FIDRES 0.157632 Hz  
AQ 3.1719923 sec  
RG 12.7  
DW 48.400 usec  
DE 6.00 usec  
TE 296.4 K  
D1 1.00000000 sec  
TDO 1

===== CHANNEL f1 =====  
NUC1 1H  
P1 9.70 usec  
PL1 0.10 dB  
PL1W 22.82879257 W  
SF01 500.1330885 MHz

F2 - Processing parameters  
SI 32768  
SF 500.1300000 MHz  
WDW EM  
SSB 0  
LB 0.30 Hz  
GB 0  
PC 1.00

### <sup>13</sup>C NMR spectrum for 1-((4-*tert*-butylphenyl)ethynyl)cycloheptanol 2m

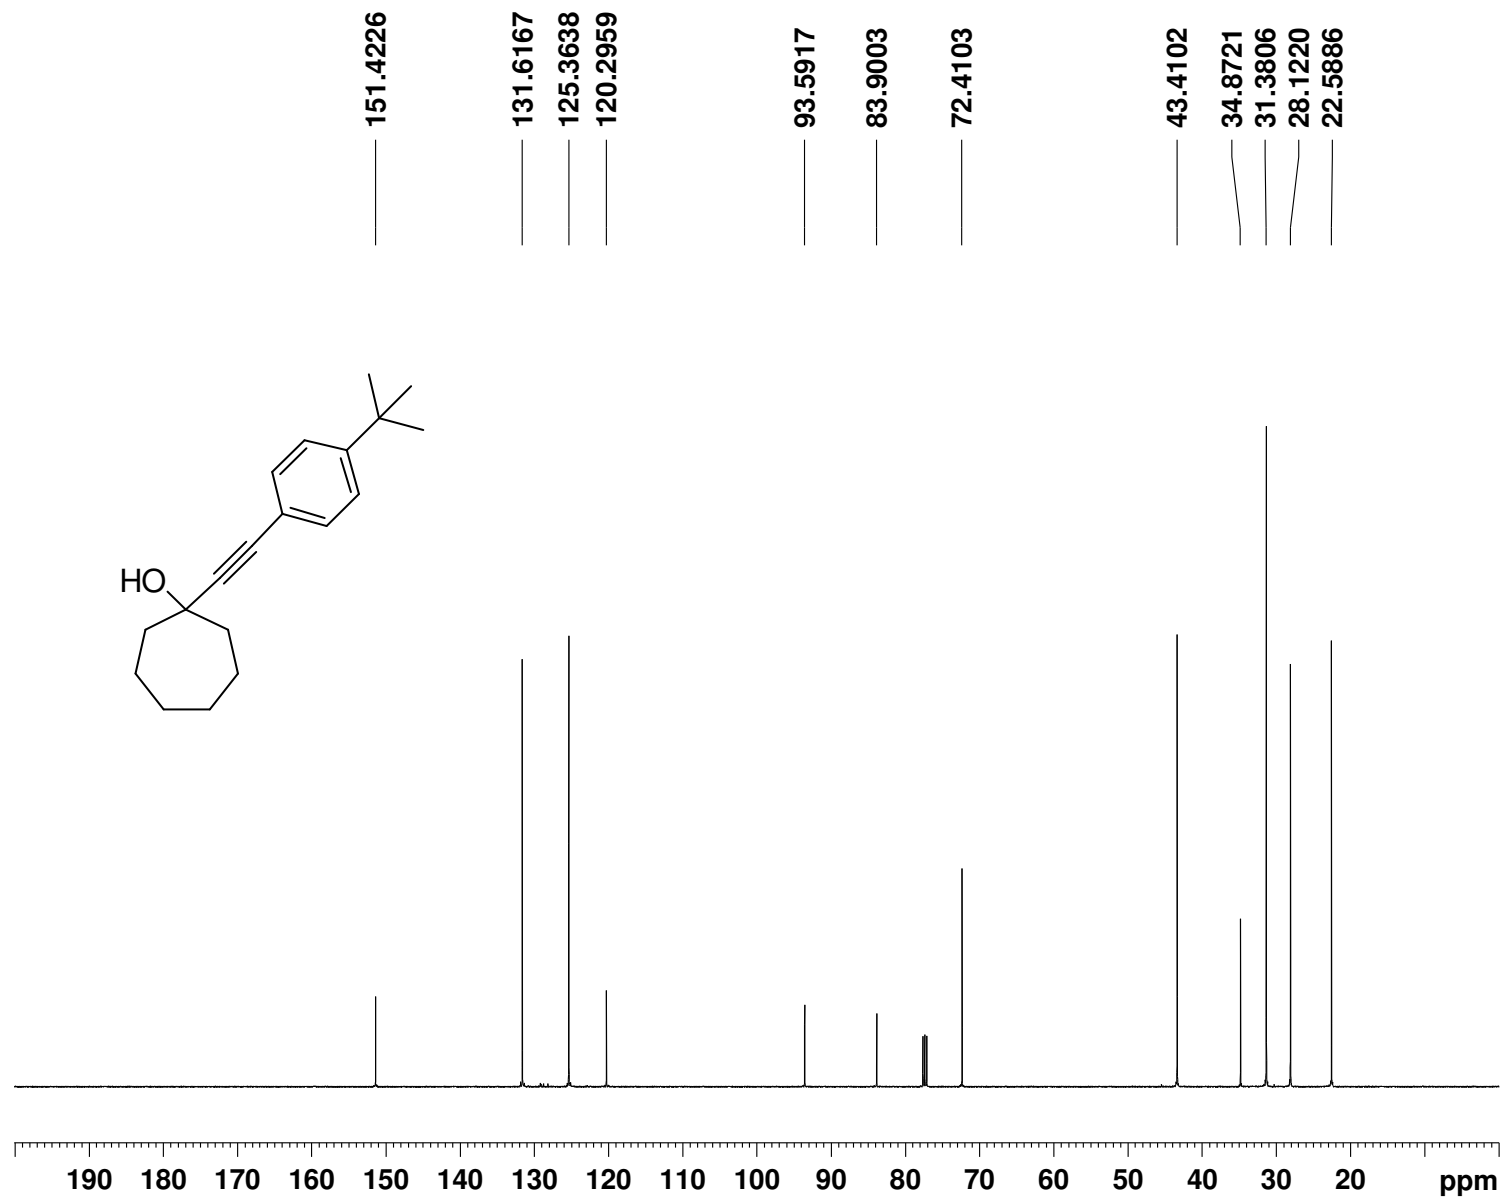

Current Data Parameters  
NAME ARM-1205\_3  
EXPNO 11  
PROCNO 1

F2 - Acquisition Parameters  
Date\_ 20120130  
Time 11.26  
INSTRUM av500sgu  
PROBHD 5 mm PABBO BB-  
PULPROG zgpg30  
TD 65536  
SOLVENT CDC13  
NS 256  
DS 4  
SWH 30030.029 Hz  
FIDRES 0.458222 Hz  
AQ 1.0912244 sec  
RG 11500  
DW 16.650 usec  
DE 6.00 usec  
TE 297.4 K  
D1 2.00000000 sec  
D11 0.03000000 sec  
TD0 8

==== CHANNEL f1 =====  
NUC1 13C  
P1 9.00 usec  
PL1 0.00 dB  
SFO1 125.7703637 MHz

==== CHANNEL f2 =====  
CPDPRG2 waltz16  
NUC2 1H  
PCPD2 80.00 usec  
PL2 0.00 dB  
PL12 18.00 dB  
PL13 18.00 dB  
PL2W 23.36054420 W  
PL12W 0.37023968 W  
PL13W 0.37023968 W  
SFO2 500.1320005 MHz

F2 - Processing parameters  
SI 32768  
SF 125.7577722 MHz  
WDW EM  
SSB 0  
LB 1.00 Hz  
GB 0  
PC 1.40

# <sup>1</sup>H NMR spectrum for 1-((4-*tert*-butylphenyl)ethynyl)cyclooctanol 2n

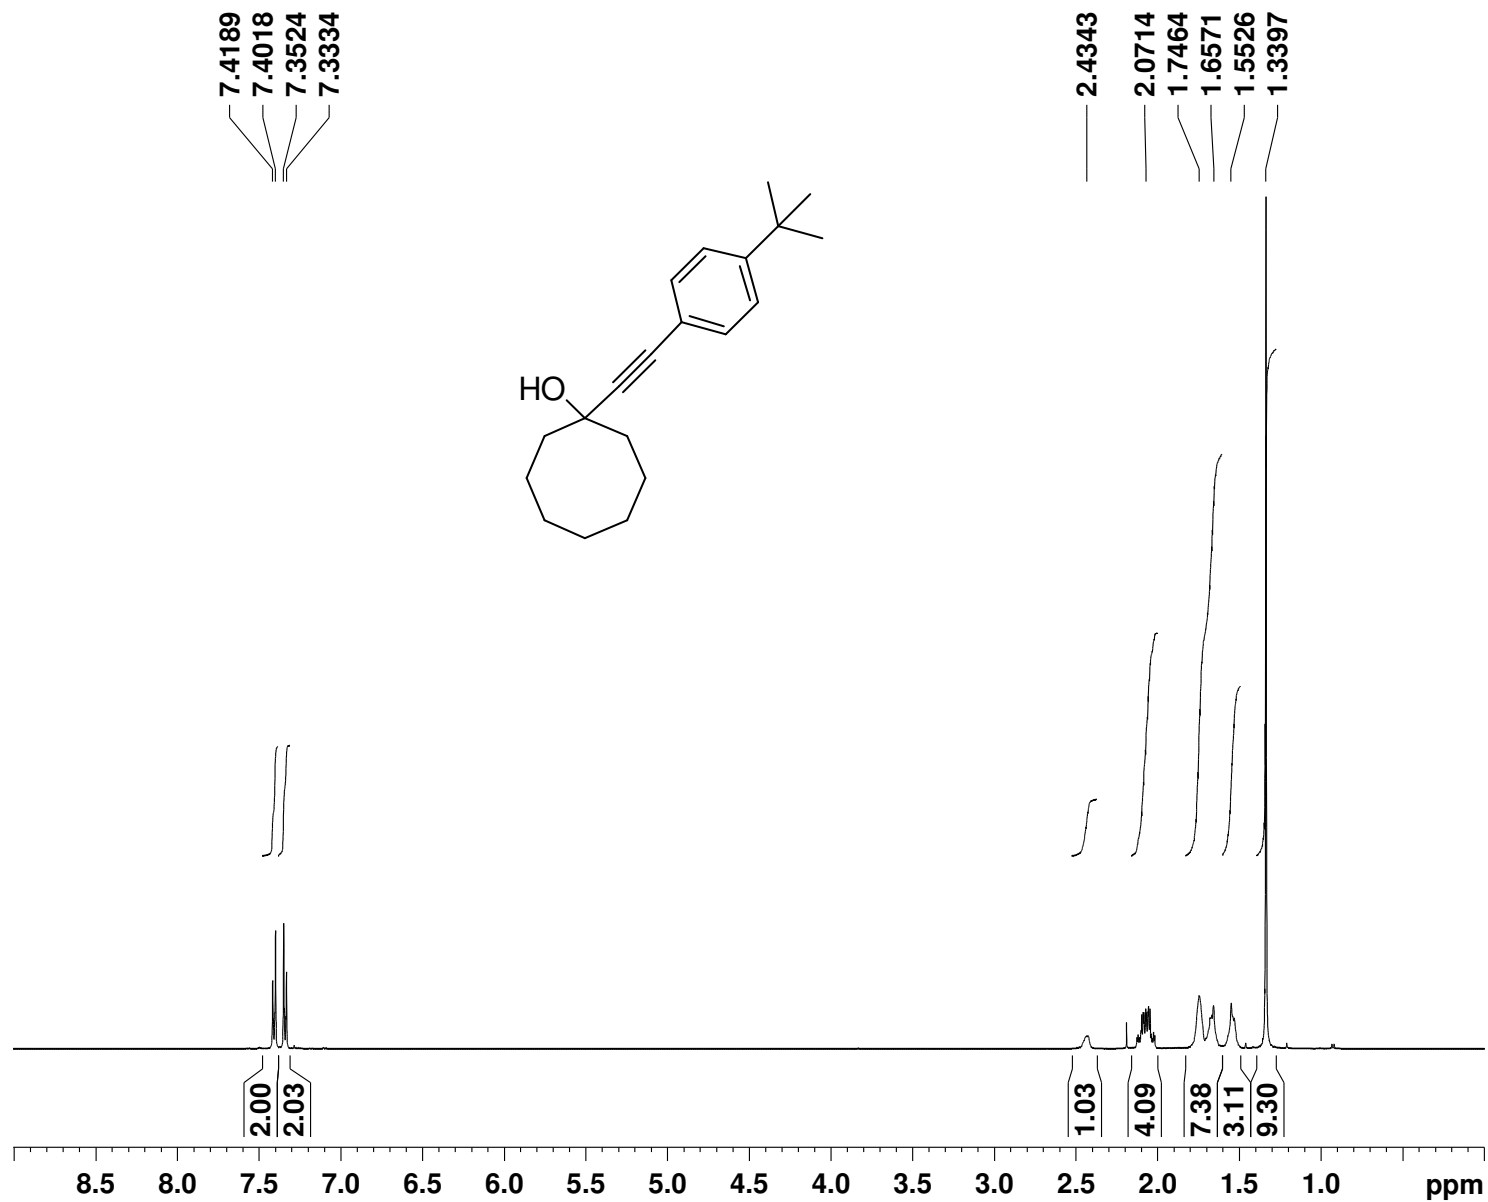

Current Data Parameters  
NAME ARM-1206\_3  
EXPNO 10  
PROCNO 1

F2 - Acquisition Parameters  
Date\_ 20120130  
Time 11.01  
INSTRUM av500sgu  
PROBHD 5 mm PABBO BB-  
PULPROG zg30  
TD 65536  
SOLVENT CDCl3  
NS 16  
DS 2  
SWH 10330.578 Hz  
FIDRES 0.157632 Hz  
AQ 3.1719923 sec  
RG 14.2  
DW 48.400 usec  
DE 6.00 usec  
TE 296.3 K  
D1 1.00000000 sec  
TD0 1

===== CHANNEL f1 =====  
NUC1 1H  
P1 9.70 usec  
PL1 0.10 dB  
PL1W 22.82879257 W  
SFO1 500.1330885 MHz

F2 - Processing parameters  
SI 32768  
SF 500.1300000 MHz  
WDW EM  
SSB 0  
LB 0.30 Hz  
GB 0  
PC 1.00

<sup>13</sup>C NMR spectrum for 1-((4-*tert*-butylphenyl)ethynyl)cyclooctanol 2n

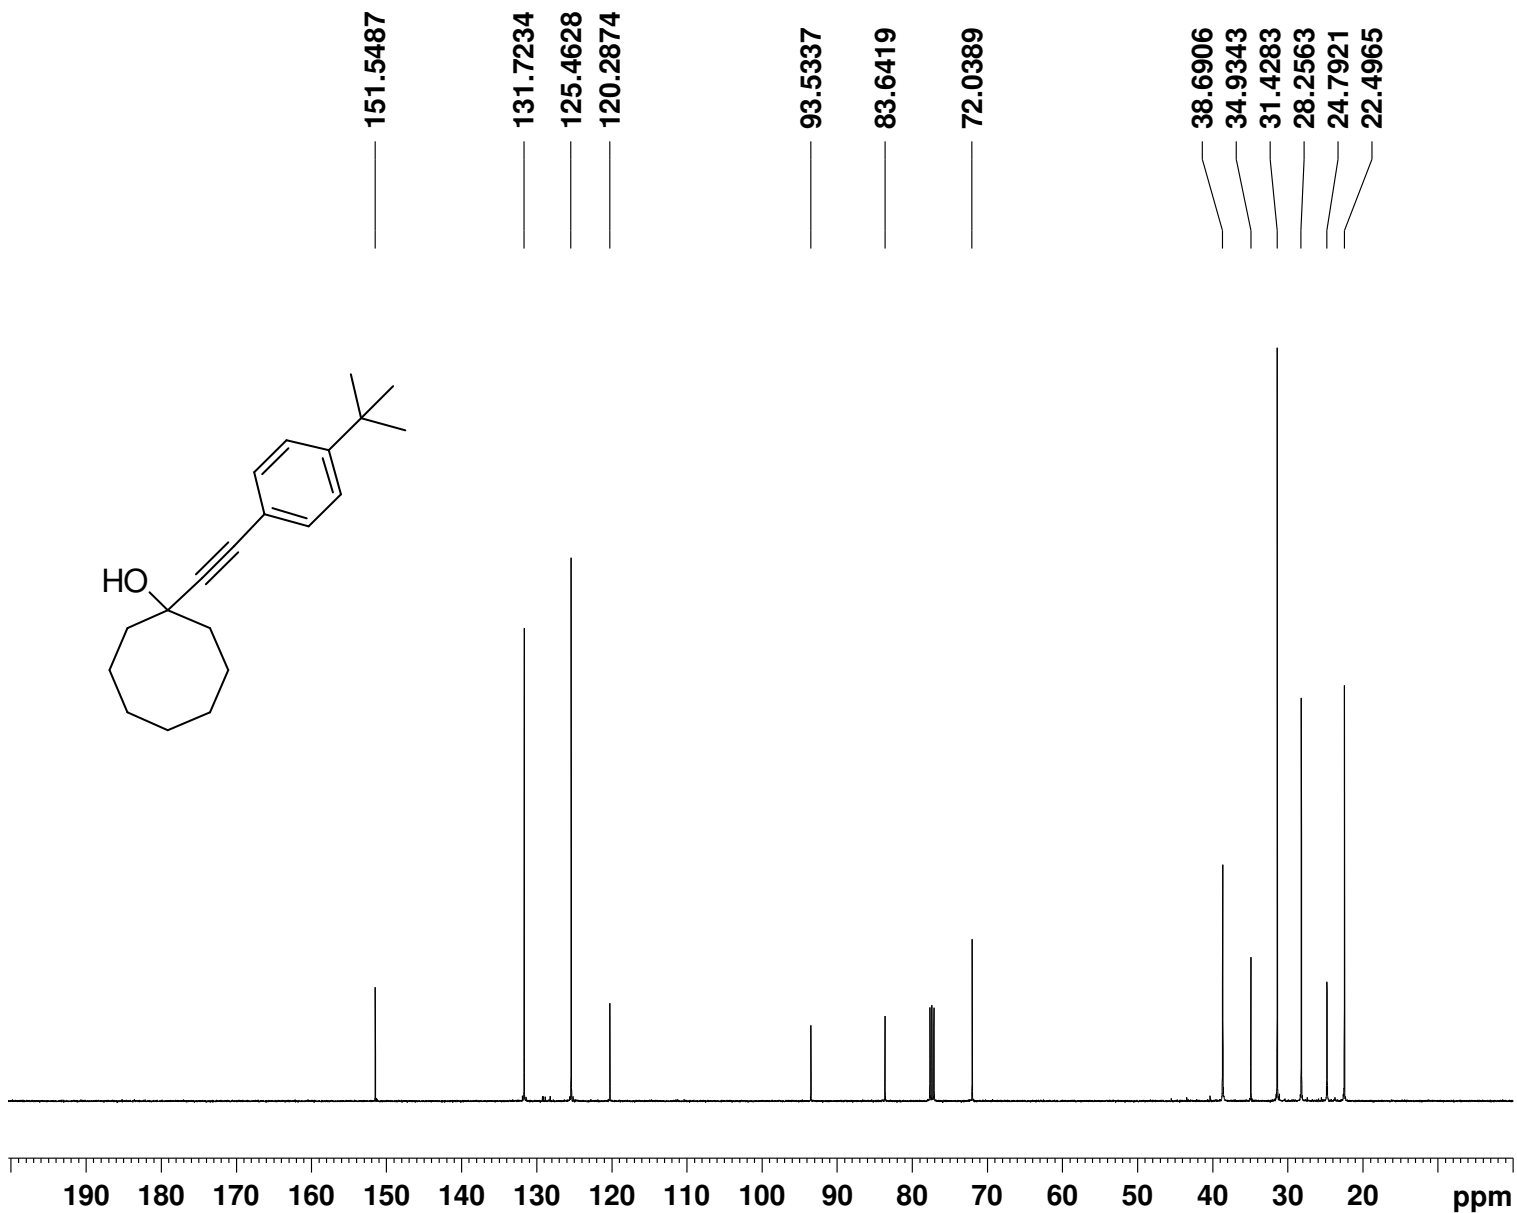

Current Data Parameters  
NAME ARM-1206\_3  
EXPNO 11  
PROCNO 1

F2 - Acquisition Parameters  
Date\_ 20120130  
Time 11.05  
INSTRUM av500sgu  
PROBHD 5 mm PABBO BB-  
PULPROG zgpg30  
TD 65536  
SOLVENT CDCl3  
NS 256  
DS 4  
SWH 30030.029 Hz  
FIDRES 0.458222 Hz  
AQ 1.0912244 sec  
RG 13000  
DW 16.650 usec  
DE 6.00 usec  
TE 297.4 K  
D1 2.00000000 sec  
D11 0.03000000 sec  
TD0 8

=====  
CHANNEL f1  
NUC1 13C  
P1 9.00 usec  
PL1 0.00 dB  
SFO1 125.7703637 MHz

=====  
CHANNEL f2  
CPDPRG2 waltz16  
NUC2 1H  
PCPD2 80.00 usec  
PL2 0.00 dB  
PL12 18.00 dB  
PL13 18.00 dB  
PL2W 23.36054420 W  
PL12W 0.37023968 W  
PL13W 0.37023968 W  
SFO2 500.1320005 MHz

F2 - Processing parameters  
SI 32768  
SF 125.7577611 MHz  
WDW EM  
SSB 0  
LB 1.00 Hz  
GB 0  
PC 1.40

# <sup>1</sup>H NMR spectrum for 3-methyl-1-phenylpent-1-yn-3-ol 2p

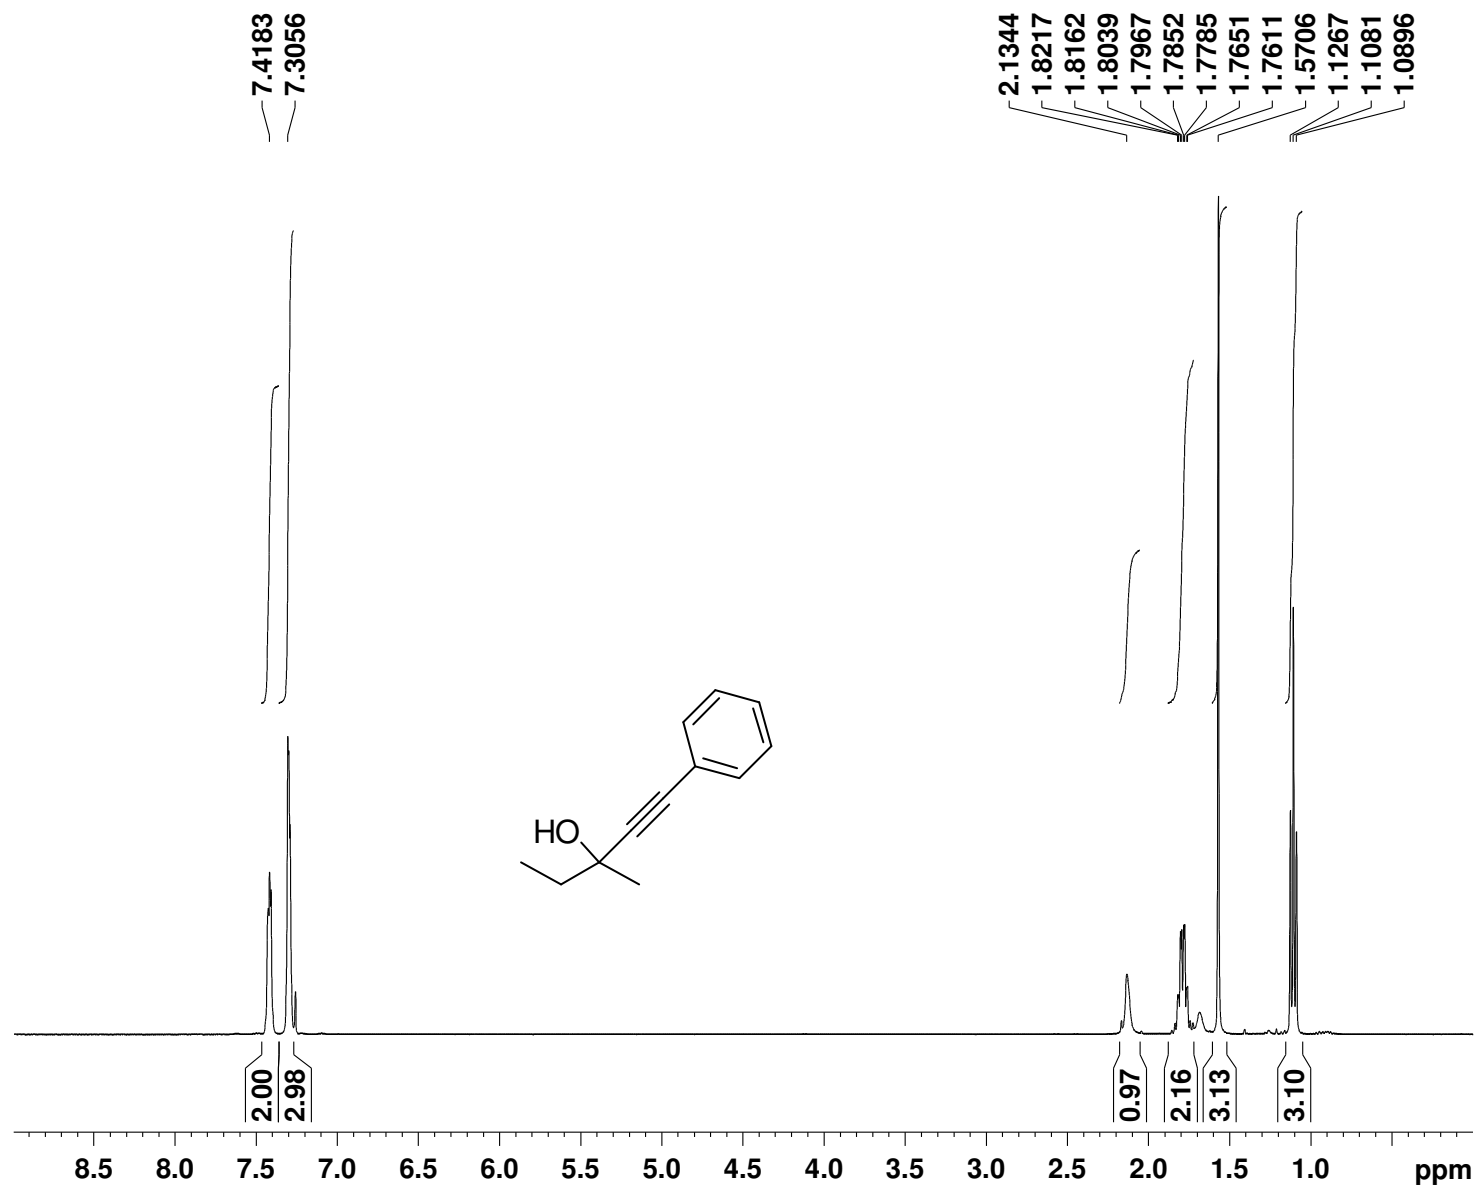

```
Current Data Parameters
NAME          WM-502
EXPNO         20
PROCNO        1

F2 - Acquisition Parameters
Date_         20120814
Time          12.38
INSTRUM       spect
PROBHD        5 mm PABBO BB/
PULPROG       zg30
TD            65536
SOLVENT       CDCl3
NS            16
DS            0
SWH           8223.685 Hz
FIDRES        0.125483 Hz
AQ            3.9845889 sec
RG            59.2
DW            60.800 usec
DE            10.69 usec
TE            294.1 K
D1            1.00000000 sec
TD0           1

===== CHANNEL f1 =====
SF01          400.1324710 MHz
NUC1          1H
P1            8.00 usec
PLW1         24.00000000 W

F2 - Processing parameters
SI            131072
SF            400.1300103 MHz
WDW           EM
SSB           0
LB            0.30 Hz
GB            0
PC            1.50
```

### <sup>13</sup>C NMR spectrum for 3-methyl-1-phenylpent-1-yn-3-ol 2p

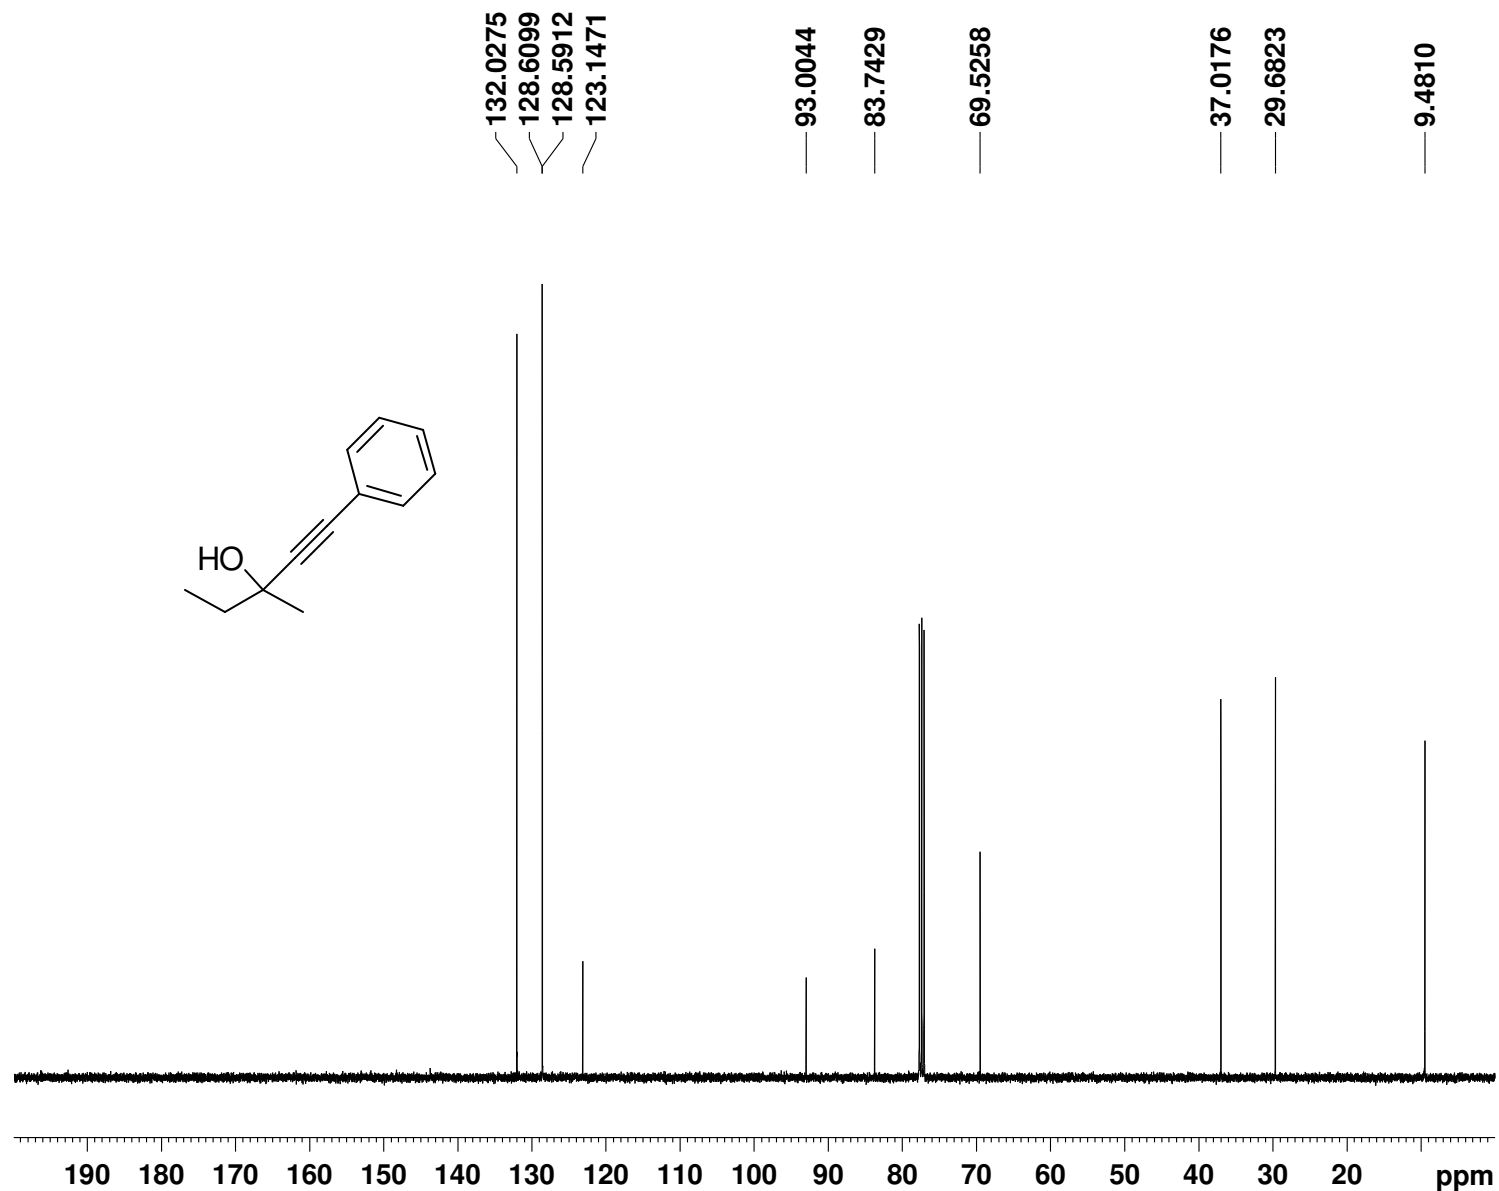

```
Current Data Parameters
NAME          WM-502
EXPNO         21
PROCNO        1

F2 - Acquisition Parameters
Date_         20120814
Time          12.54
INSTRUM       spect
PROBHD        5 mm PABBO BB/
PULPROG       zgpg30
TD            65536
SOLVENT       CDCl3
NS            256
DS            4
SWH           24038.461 Hz
FIDRES        0.366798 Hz
AQ            1.3631488 sec
RG            181.72
DW            20.800 usec
DE            8.18 usec
TE            294.5 K
D1            2.0000000 sec
D11           0.0300000 sec
TD0           1

===== CHANNEL f1 =====
SFO1          100.6228293 MHz
NUC1          13C
P1            9.00 usec
PLW1          77.00000000 W

===== CHANNEL f2 =====
SFO2          400.1316005 MHz
NUC2          1H
CPDPRG[2]    waltz16
PCPD2        90.00 usec
PLW2          24.00000000 W
PLW12         0.17567000 W
PLW13         0.14229999 W

F2 - Processing parameters
SI            65536
SF            100.6127342 MHz
WDW           EM
SSB           0
LB            0.50 Hz
GB            0
PC            1.40
```

<sup>1</sup>H NMR spectrum for 3,4,4-trimethyl-1-phenylpent-1-yn-3-ol 2q

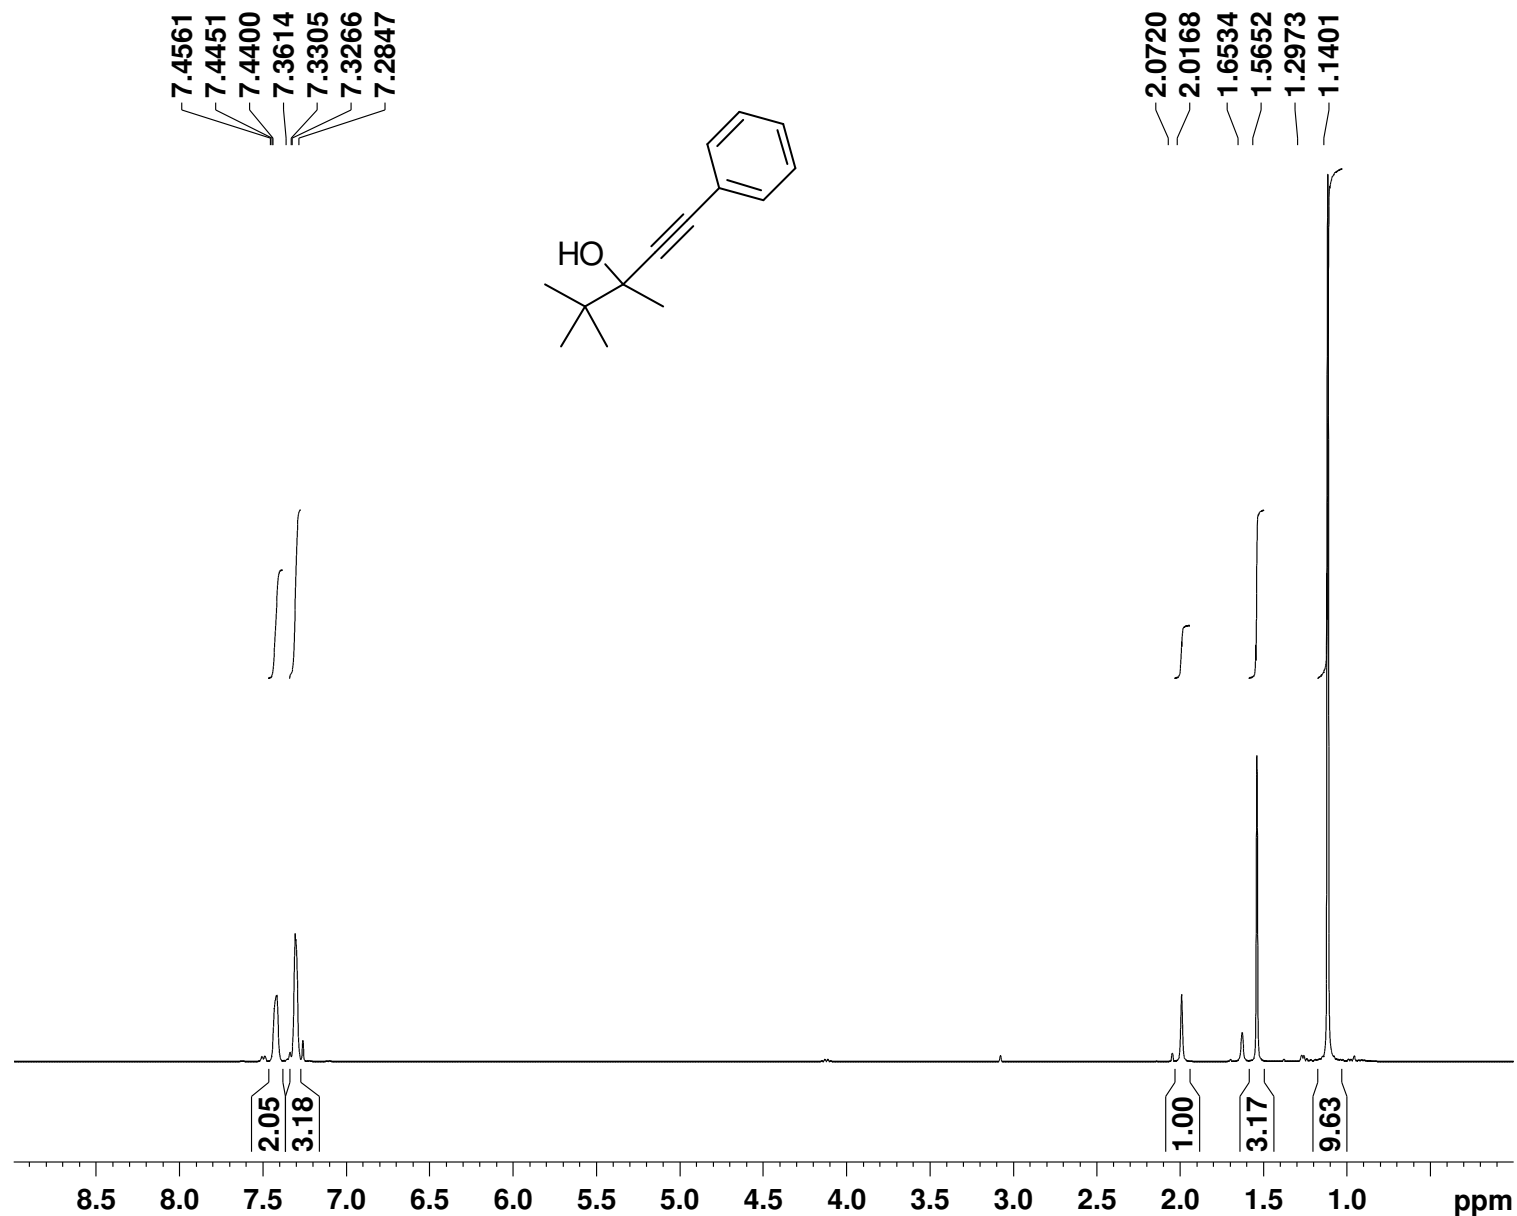

Current Data Parameters  
NAME WM-505  
EXPNO 2  
PROCNO 1

F2 - Acquisition Parameters  
Date\_ 20120830  
Time 15.34  
INSTRUM spect  
PROBHD 5 mm PABBO BB/  
PULPROG zg30  
TD 65536  
SOLVENT CDC13  
NS 16  
DS 0  
SWH 8223.685 Hz  
FIDRES 0.125483 Hz  
AQ 3.9845889 sec  
RG 65.91  
DW 60.800 usec  
DE 10.69 usec  
TE 294.1 K  
D1 1.00000000 sec  
TDO 1

===== CHANNEL f1 =====  
SFO1 400.1324710 MHz  
NUC1 1H  
P1 8.00 usec  
PLW1 24.00000000 W

F2 - Processing parameters  
SI 131072  
SF 400.1300099 MHz  
WDW EM  
SSB 0  
LB 0.30 Hz  
GB 0  
PC 1.50

### <sup>13</sup>C NMR spectrum for 3,4,4-trimethyl-1-phenylpent-1-yn-3-ol 2q

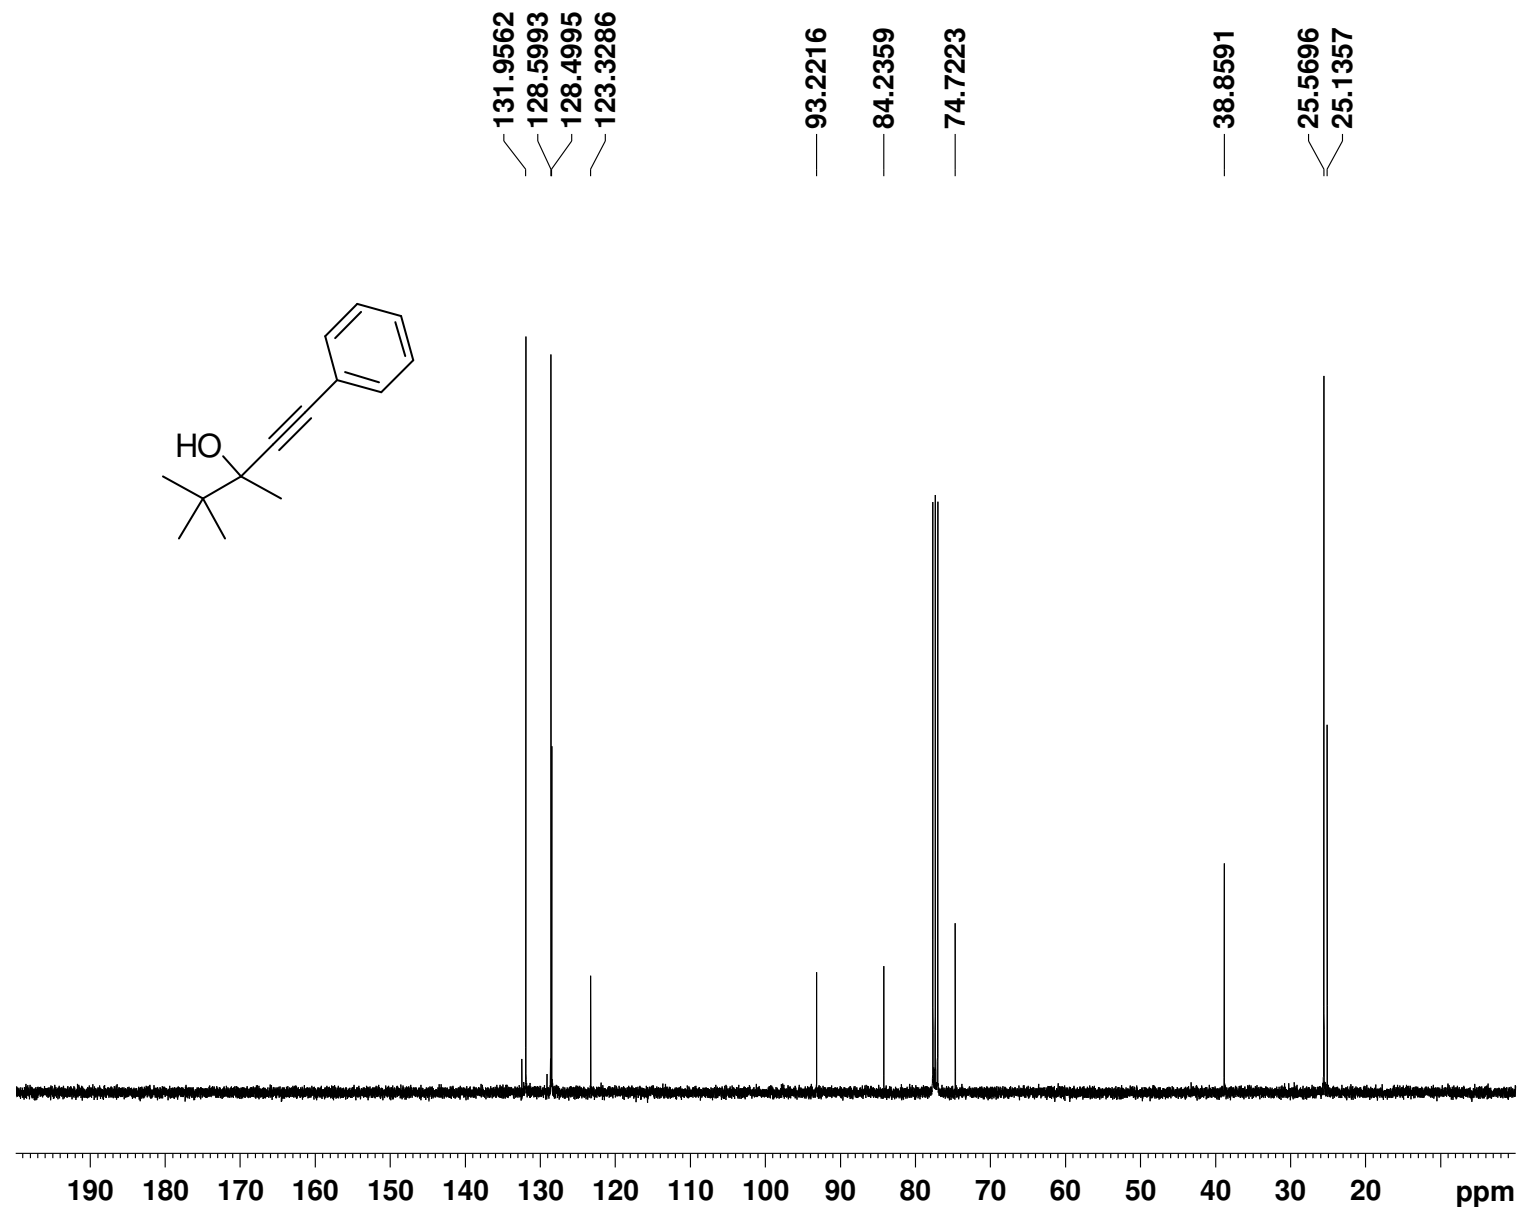

```
Current Data Parameters
NAME          WM-505
EXPNO         20
PROCNO        1

F2 - Acquisition Parameters
Date_         20120830
Time          16.52
INSTRUM       spect
PROBHD        5 mm PABBO BB/
PULPROG       zgpg30
TD            65536
SOLVENT       CDC13
NS            256
DS            4
SWH           24038.461 Hz
FIDRES        0.366798 Hz
AQ            1.3631488 sec
RG            181.72
DW            20.800 usec
DE            8.18 usec
TE            294.5 K
D1            2.0000000 sec
D11           0.0300000 sec
TD0           1

===== CHANNEL f1 =====
SF01          100.6228293 MHz
NUC1           13C
P1             9.00 usec
PLW1          77.0000000 W

===== CHANNEL f2 =====
SF02          400.1316005 MHz
NUC2           1H
CPDPRG[2]     waltz16
PCPD2         90.00 usec
PLW2          24.0000000 W
PLW12         0.1756700 W
PLW13         0.14229999 W

F2 - Processing parameters
SI            65536
SF            100.6127350 MHz
WDW           EM
SSB           0
LB            0.50 Hz
GB            0
PC            1.40
```



# <sup>1</sup>H NMR spectrum for 1-(4-*tert*-butylphenyl)-2-cyclopentylidene-2-iodoethanone 4d

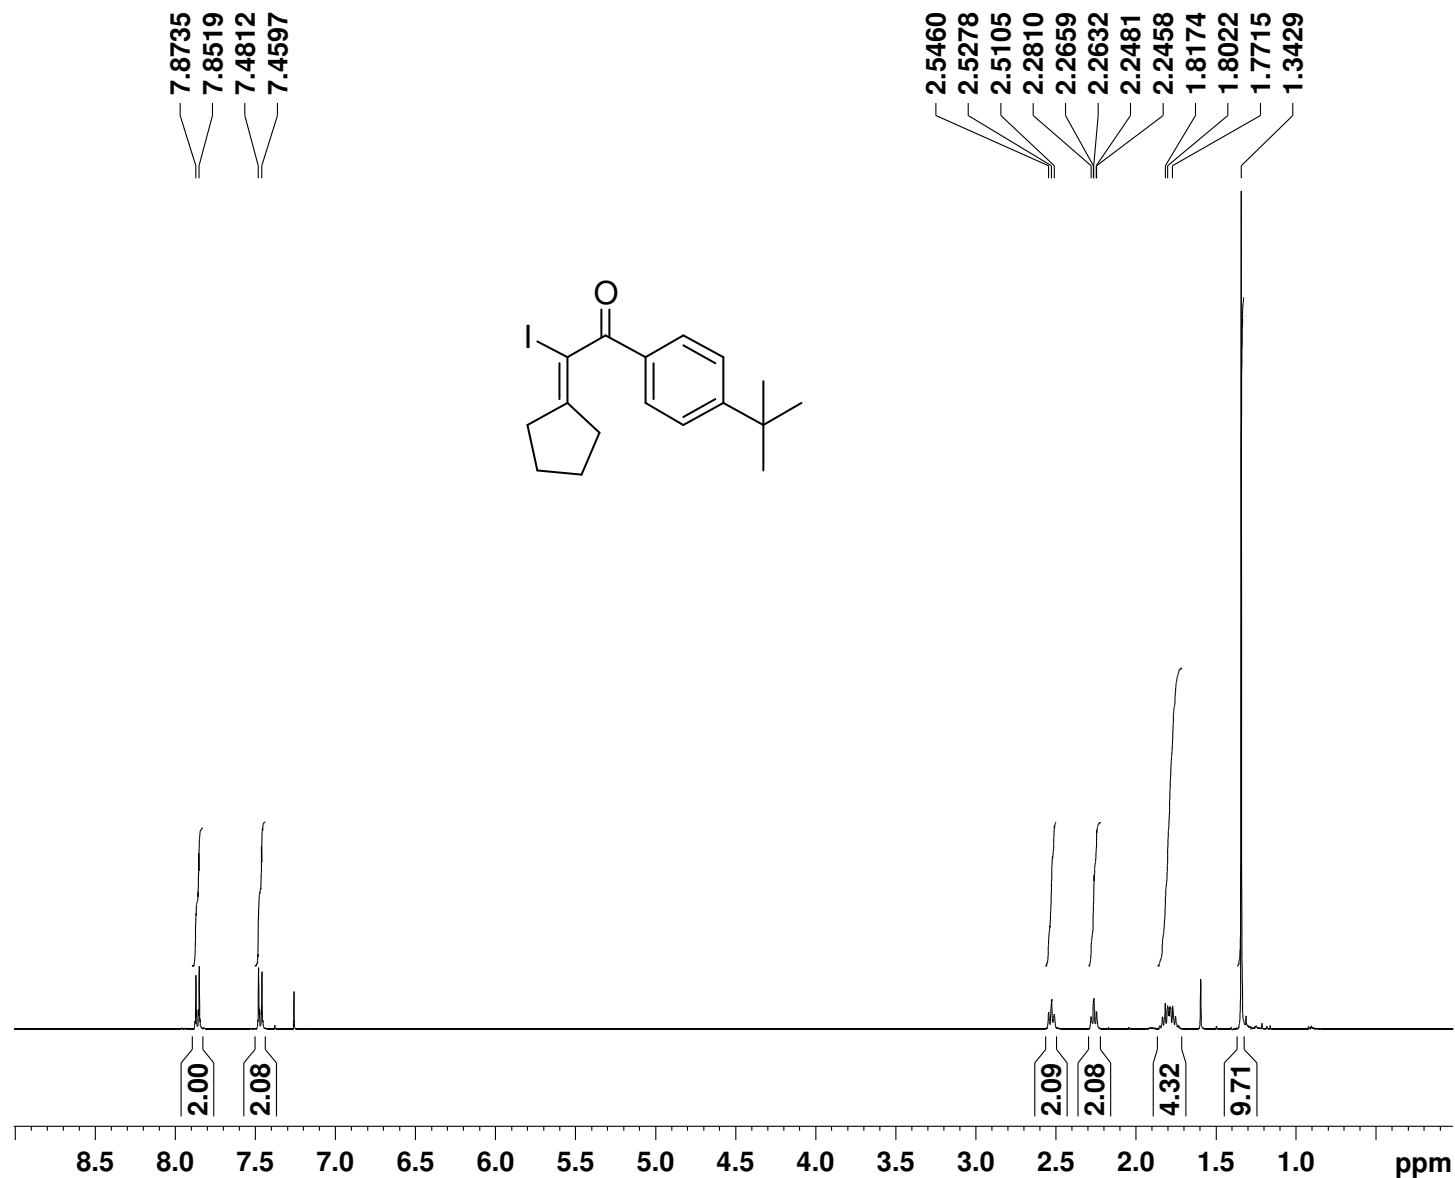

```
Current Data Parameters
NAME      ARM-1235
EXPNO    6
PROCNO   1

F2 - Acquisition Parameters
Date_    20110922
Time     13.57
INSTRUM  dpx400
PROBHD   5 mm QNP 1H/1
PULPROG  zg30
TD       65536
SOLVENT  CDCl3
NS       16
DS       2
SWH      8278.146 Hz
FIDRES   0.126314 Hz
AQ       3.9584243 sec
RG       228.1
DW       60.400 usec
DE       6.00 usec
TE       292.1 K
D1       1.00000000 sec
TDO      1

===== CHANNEL f1 =====
NUC1     1H
P1       8.40 usec
PL1     -3.00 dB
SFO1    400.1324710 MHz

F2 - Processing parameters
SI       32768
SF       400.1300096 MHz
WDW      EM
SSB      0
LB       0.30 Hz
GB       0
PC       1.00
```

### <sup>13</sup>C NMR spectrum for 1-(4-*tert*-butylphenyl)-2-cyclopentylidene-2-iodoethanone 4d

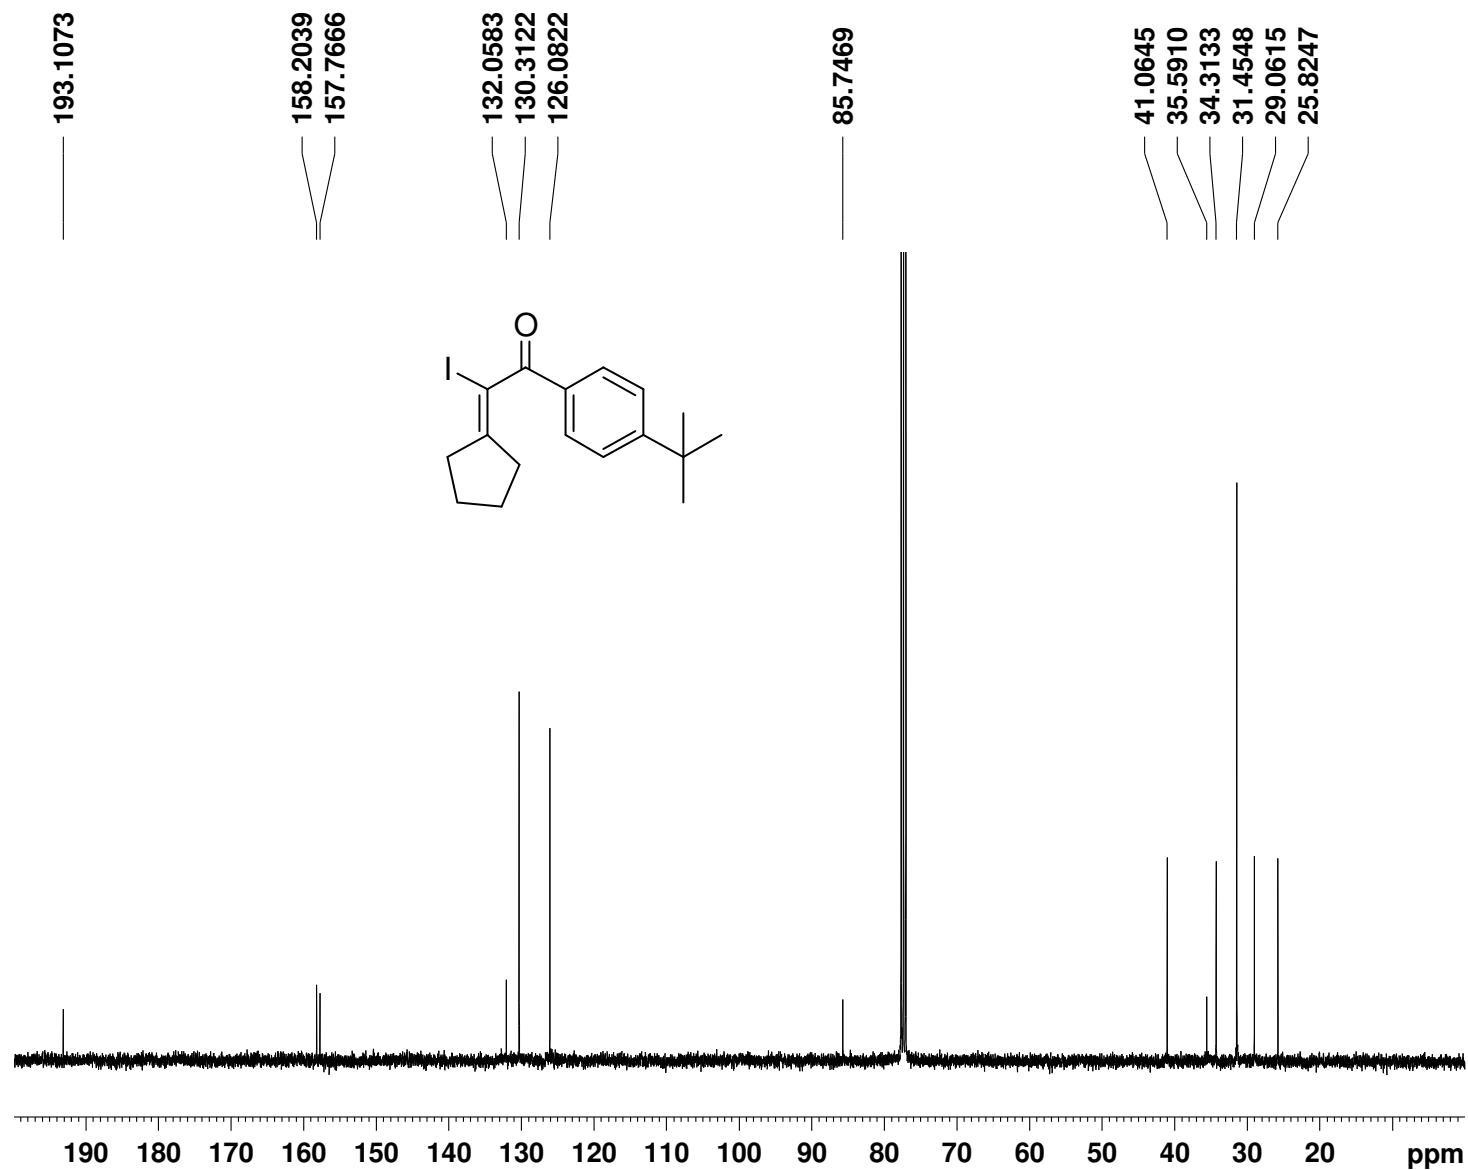

```
Current Data Parameters
NAME      ARM-1235
EXPNO     8
PROCNO    1

F2 - Acquisition Parameters
Date_     20110922
Time      14.53
INSTRUM   dpx400
PROBHD    5 mm QNP 1H/1
PULPROG   zgpg30
TD         65536
SOLVENT   CDCl3
NS         256
DS         4
SWH        23980.814 Hz
FIDRES     0.365918 Hz
AQ         1.3664756 sec
RG         11585.2
DW         20.850 usec
DE         6.00 usec
TE         292.5 K
D1         2.00000000 sec
d11        0.03000000 sec
DELTA     1.89999998 sec
TD0        8

===== CHANNEL f1 =====
NUC1       13C
P1         9.70 usec
PL1        -3.00 dB
SFO1       100.6228298 MHz

===== CHANNEL f2 =====
CPDPRG2    waltz16
NUC2       1H
PCPD2      84.00 usec
PL2        -3.00 dB
PL12       16.08 dB
PL13       18.00 dB
SFO2       400.1316005 MHz

F2 - Processing parameters
SI         32768
SF         100.6127338 MHz
WDW        EM
SSB        0
LB         1.00 Hz
GB         0
PC         1.40
```

### <sup>1</sup>H NMR spectrum for 2-cyclopentylidene-2-iodo-1-*p*-tolylethanone 4e

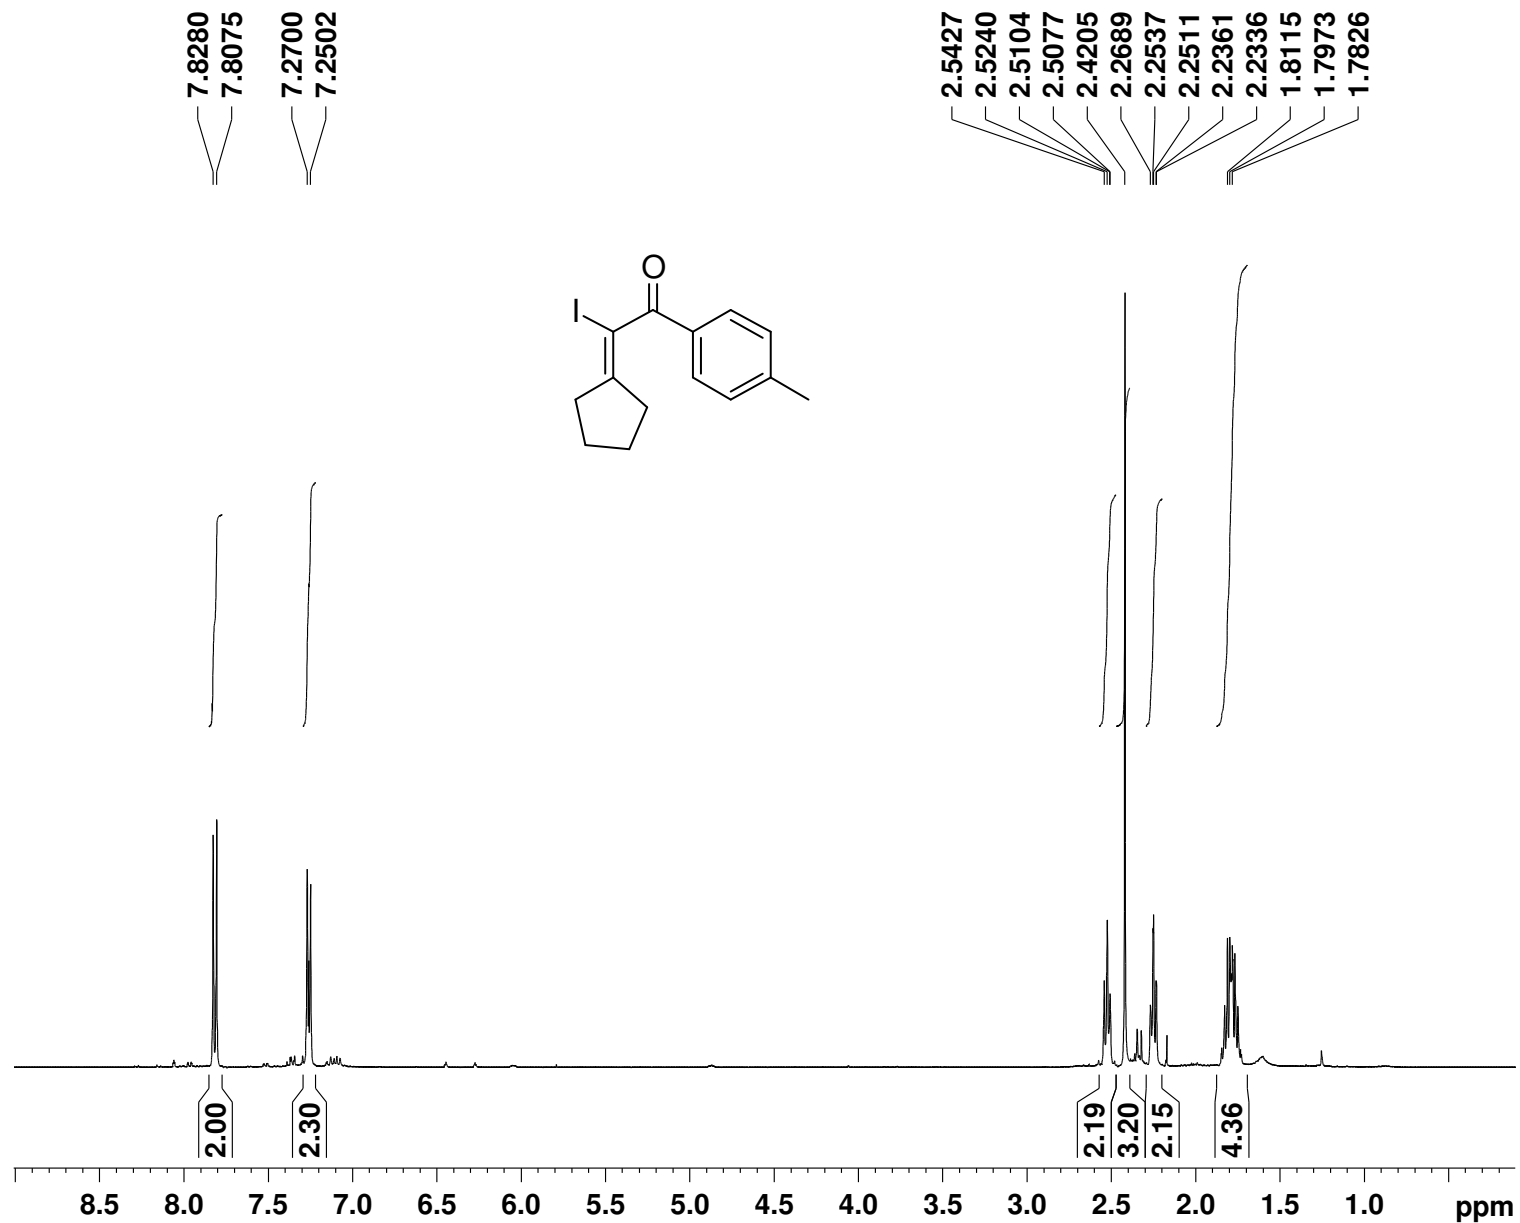

```
Current Data Parameters
NAME      ARM-1380_500
EXPNO     2
PROCNO    1

F2 - Acquisition Parameters
Date_     20111129
Time      13.19
INSTRUM   dpx400
PROBHD    5 mm QNP 1H/1
PULPROG   zg30
TD         65536
SOLVENT   CDCl3
NS         16
DS         2
SWH        8278.146 Hz
FIDRES     0.126314 Hz
AQ         3.9584243 sec
RG         228.1
DW         60.400 usec
DE         6.00 usec
TE         293.0 K
D1         1.00000000 sec
TD0        1

===== CHANNEL f1 =====
NUC1      1H
P1        8.40 usec
PL1       -3.00 dB
SFO1      400.1324710 MHz

F2 - Processing parameters
SI         32768
SF         400.1300095 MHz
WDW        EM
SSB        0
LB         0.30 Hz
GB         0
PC         1.00
```

<sup>13</sup>C NMR spectrum for 2-cyclopentylidene-2-iodo-1-*p*-tolylethanone 4e

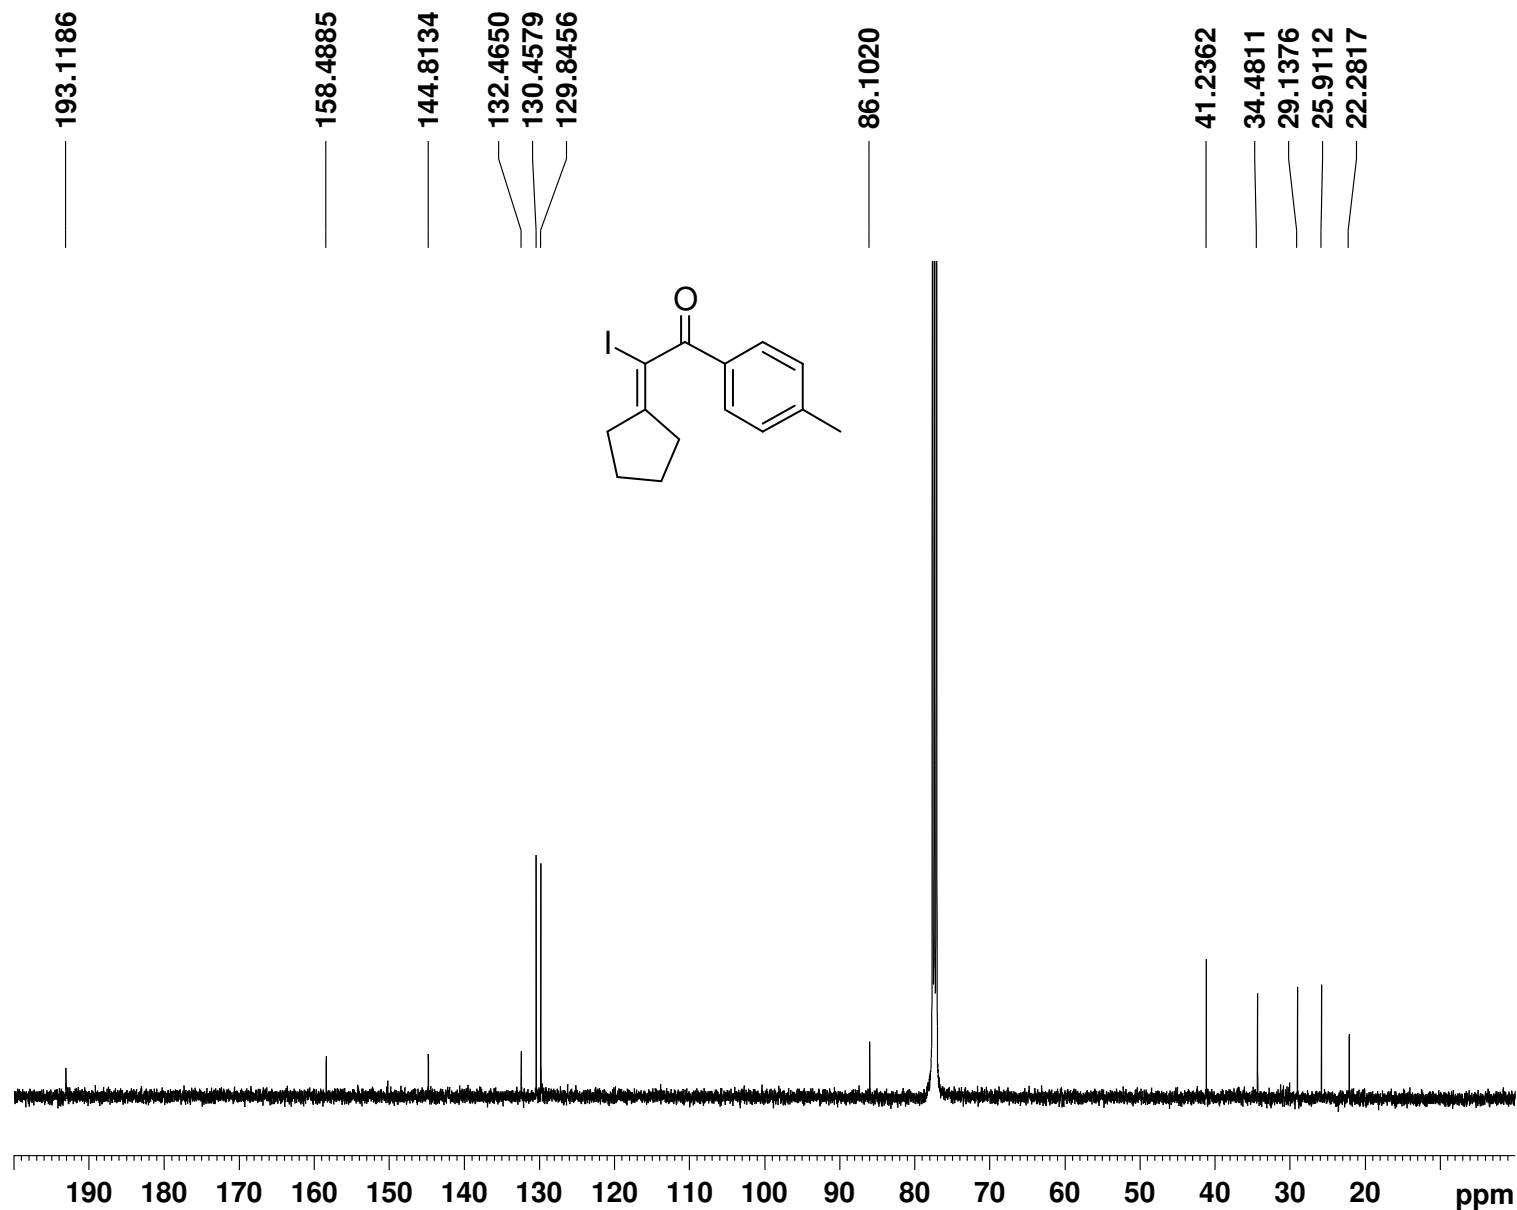

```
Current Data Parameters
NAME      ARM-1252_500
EXPNO     3
PROCNO    1

F2 - Acquisition Parameters
Date_     20111005
Time      18.07
INSTRUM   av500
PROBHD    5 mm PABBO BB-
PULPROG   zgpg30
TD        65536
SOLVENT   CDCl3
NS        9600
DS        4
SWH       30030.029 Hz
FIDRES    0.458222 Hz
AQ        1.0912244 sec
RG        16400
DW        16.650 usec
DE        6.00 usec
TE        303.6 K
D1        2.00000000 sec
d11       0.03000000 sec
DELTA     1.89999998 sec
TDO       300

===== CHANNEL f1 =====
NUC1      13C
P1        9.00 usec
PL1       0.00 dB
SFO1      125.7703637 MHz

===== CHANNEL f2 =====
CPDPRG2   waltz16
NUC2      1H
PCPD2     80.00 usec
PL2       0.00 dB
PL12      18.00 dB
PL13      18.00 dB
SFO2      500.1320005 MHz

F2 - Processing parameters
SI        32768
SF        125.7577384 MHz
WDW       EM
SSB       0
LB        1.00 Hz
GB        0
PC        1.40
```

### <sup>1</sup>H NMR spectrum for 2-cyclopentylidene-1-(4-ethylphenyl)-2-iodoethanone 4f

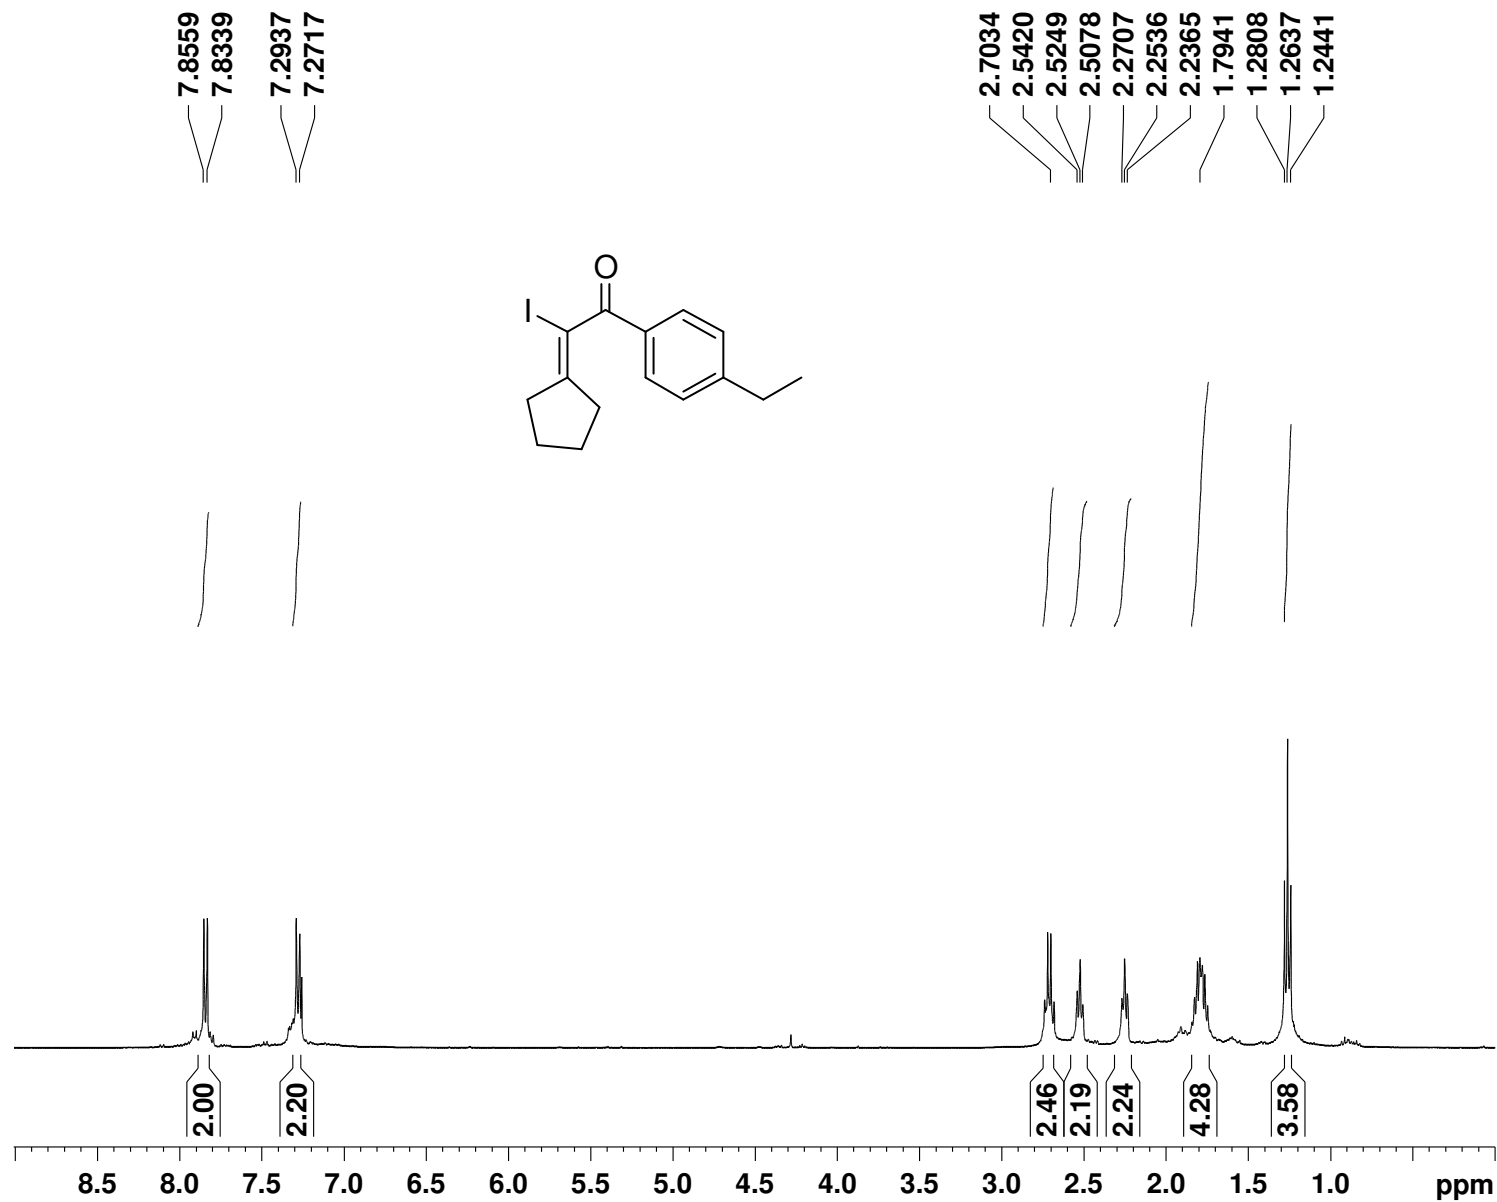

Current Data Parameters  
NAME ARM-1376  
EXPNO 7  
PROCNO 1

F2 - Acquisition Parameters  
Date\_ 20111107  
Time 9.43  
INSTRUM dpx400  
PROBHD 5 mm QNP 1H/1  
PULPROG zg30  
TD 65536  
SOLVENT CDCl3  
NS 16  
DS 2  
SWH 8278.146 Hz  
FIDRES 0.126314 Hz  
AQ 3.9584243 sec  
RG 161.3  
DW 60.400 usec  
DE 6.00 usec  
TE 291.2 K  
D1 1.00000000 sec  
TDO 1

===== CHANNEL f1 =====  
NUC1 1H  
P1 8.40 usec  
PL1 -3.00 dB  
SFO1 400.1324710 MHz

F2 - Processing parameters  
SI 32768  
SF 400.1300099 MHz  
WDW EM  
SSB 0  
LB 0.30 Hz  
GB 0  
PC 1.00

<sup>13</sup>C NMR spectrum for 2-cyclopentylidene-1-(4-ethylphenyl)-2-iodoethanone 4f

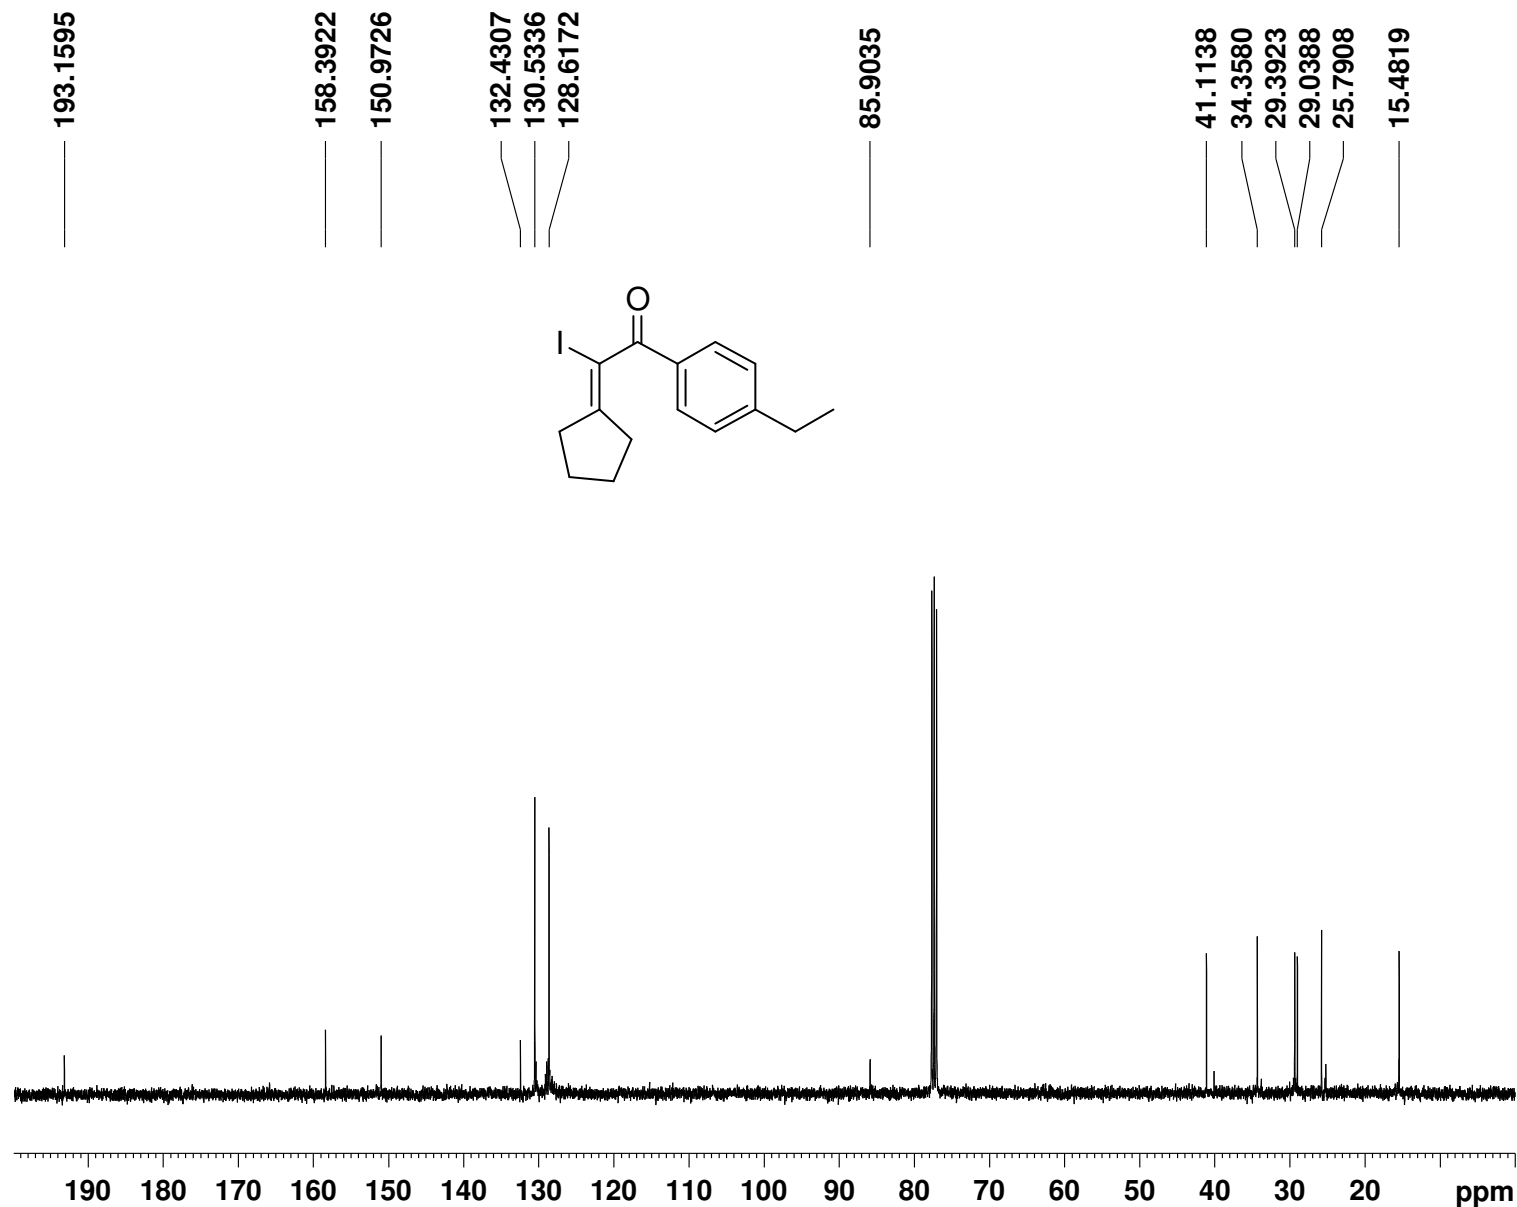

Current Data Parameters  
NAME ARM-1376  
EXPNO 8  
PROCNO 1

F2 - Acquisition Parameters  
Date\_ 20111107  
Time 10.26  
INSTRUM dpx400  
PROBHD 5 mm QNP 1H/1  
PULPROG zgpg30  
TD 65536  
SOLVENT CDCl3  
NS 224  
DS 4  
SWH 23980.814 Hz  
FIDRES 0.365918 Hz  
AQ 1.3664756 sec  
RG 6502  
DW 20.850 usec  
DE 6.00 usec  
TE 291.8 K  
D1 2.0000000 sec  
d11 0.03000000 sec  
DELTA 1.89999998 sec  
TD0 8

===== CHANNEL f1 =====  
NUC1 13C  
P1 9.70 usec  
PL1 -3.00 dB  
SFO1 100.6228298 MHz

===== CHANNEL f2 =====  
CPDPRG2 waltz16  
NUC2 1H  
PCPD2 84.00 usec  
PL2 -3.00 dB  
PL12 16.08 dB  
PL13 18.00 dB  
SFO2 400.1316005 MHz

F2 - Processing parameters  
SI 32768  
SF 100.6127359 MHz  
WDW EM  
SSB 0  
LB 1.00 Hz  
GB 0  
PC 1.40

# <sup>1</sup>H NMR spectrum for 1-(4-butylphenyl)-2-cyclopentylidene-2-iodoethanone 4g

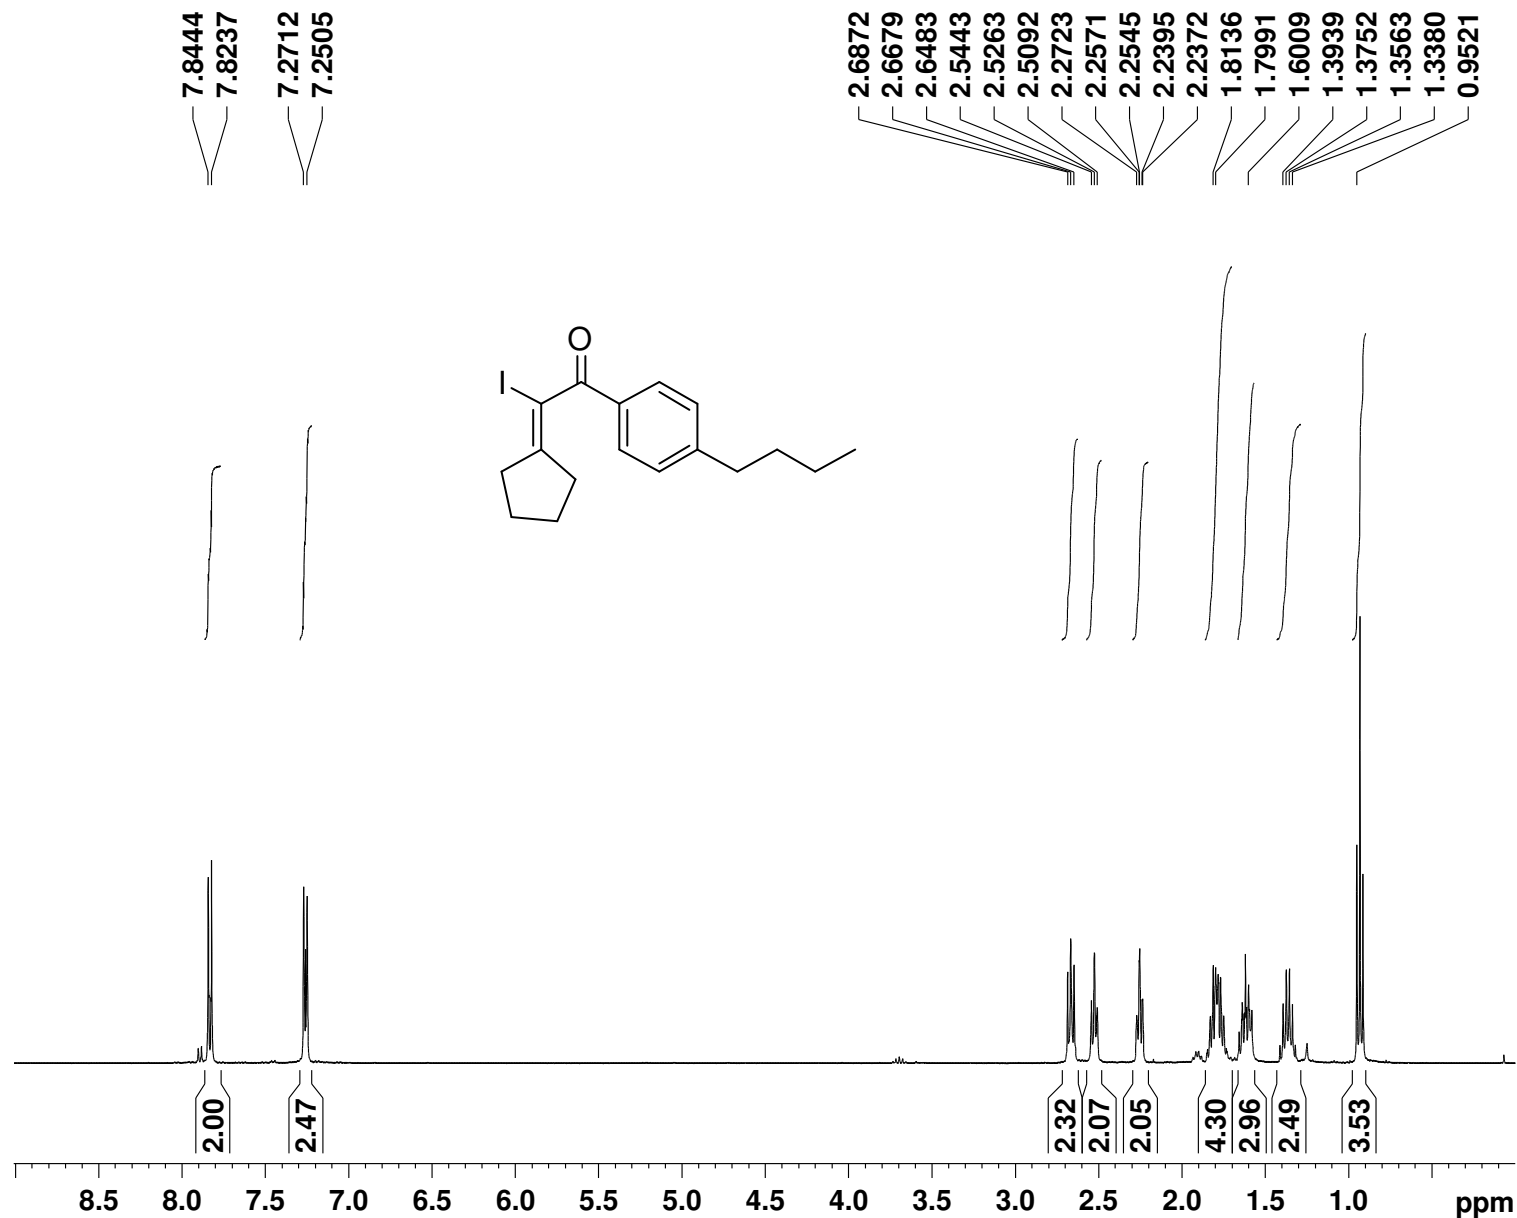

Current Data Parameters  
NAME ARM-1300  
EXPNO 7  
PROCNO 1

F2 - Acquisition Parameters  
Date\_ 20111020  
Time 9.51  
INSTRUM dp400  
PROBHD 5 mm QNP 1H/1  
PULPROG zg30  
TD 65536  
SOLVENT CDCl3  
NS 16  
DS 2  
SWH 8278.146 Hz  
FIDRES 0.126314 Hz  
AQ 3.9584243 sec  
RG 228.1  
DW 60.400 usec  
DE 6.00 usec  
TE 292.5 K  
D1 1.00000000 sec  
TD0 1

===== CHANNEL f1 =====  
NUC1 1H  
P1 8.40 usec  
PL1 -3.00 dB  
SFO1 400.1324710 MHz

F2 - Processing parameters  
SI 32768  
SF 400.1300095 MHz  
WDW EM  
SSB 0  
LB 0.30 Hz  
GB 0  
PC 1.00

<sup>13</sup>C NMR spectrum for 1-(4-butylphenyl)-2-cyclopentylidene-2-iodoethanone 4g

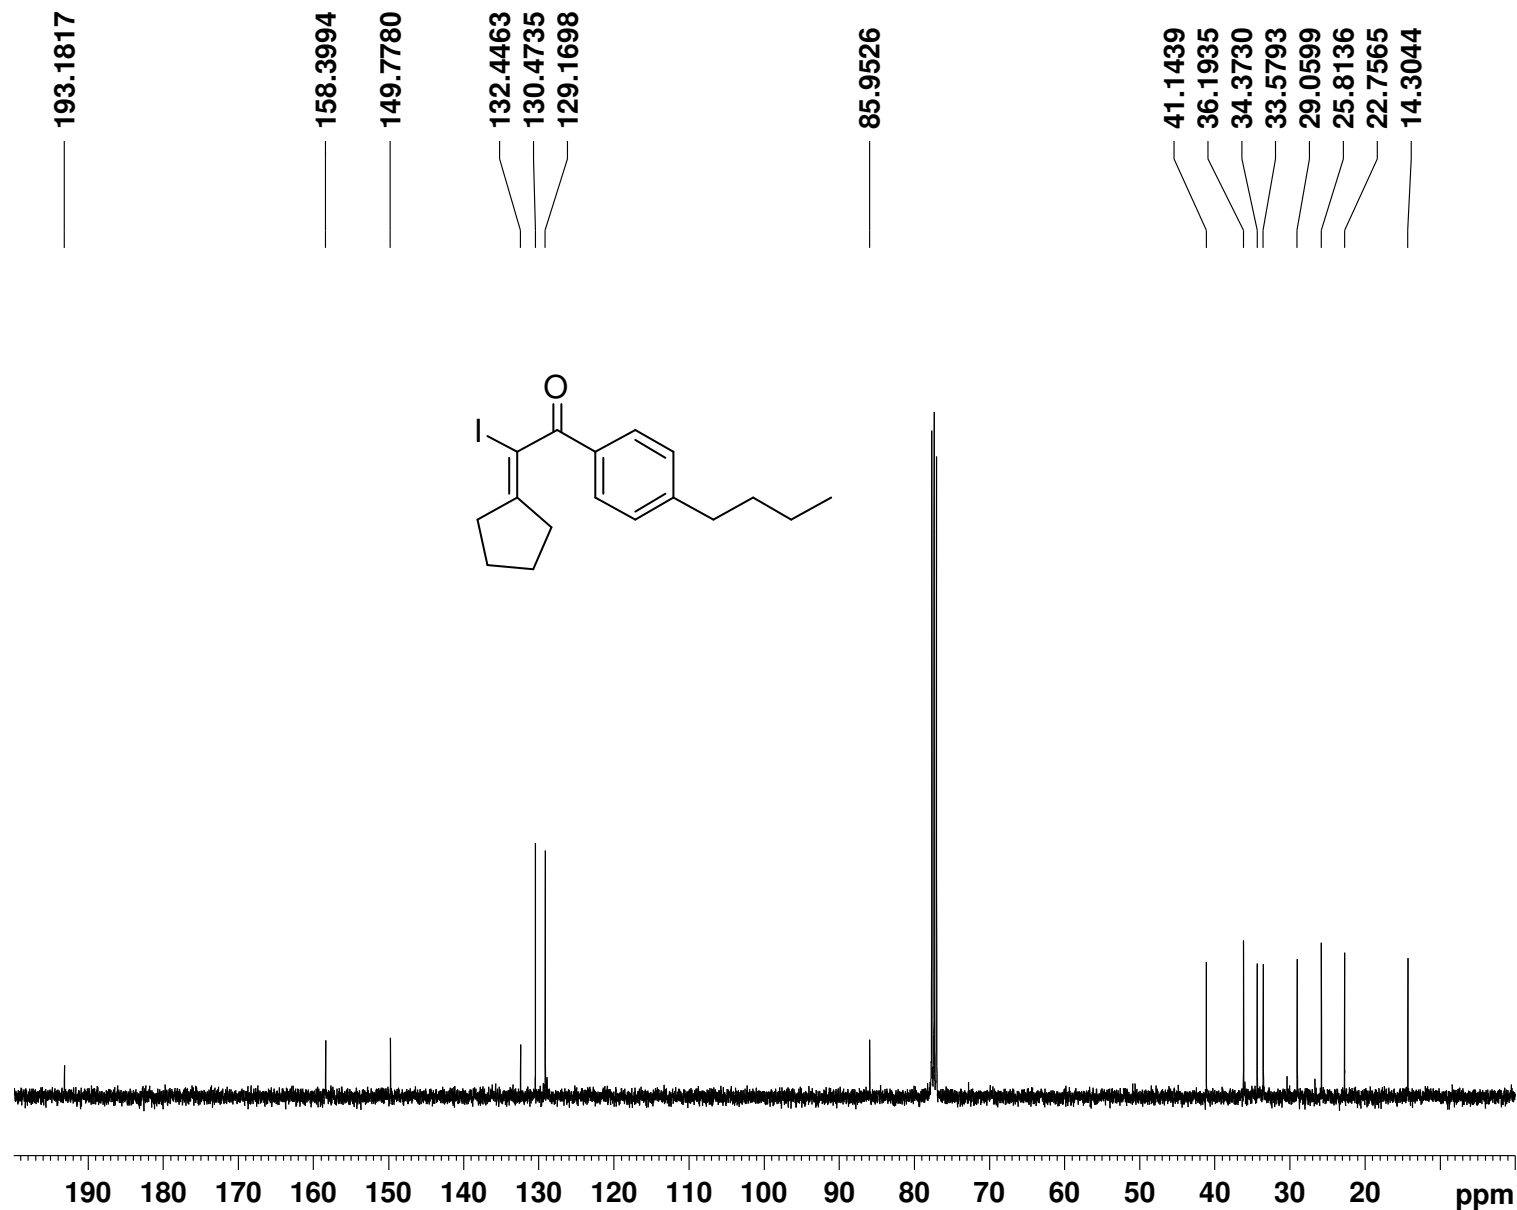

Current Data Parameters  
NAME ARM-1300  
EXPNO 6  
PROCNO 1

F2 - Acquisition Parameters  
Date\_ 20110929  
Time 15.18  
INSTRUM dpx400  
PROBHD 5 mm QNP 1H/1  
PULPROG zgpg30  
TD 65536  
SOLVENT CDCl3  
NS 256  
DS 4  
SWH 23980.814 Hz  
FIDRES 0.365918 Hz  
AQ 1.3664756 sec  
RG 6502  
DW 20.850 usec  
DE 6.00 usec  
TE 292.6 K  
D1 2.00000000 sec  
d11 0.03000000 sec  
DELTA 1.89999998 sec  
TDO 8

==== CHANNEL f1 =====  
NUC1 13C  
P1 9.70 usec  
PL1 -3.00 dB  
SFO1 100.6228298 MHz

==== CHANNEL f2 =====  
CPDPRG2 waltz16  
NUC2 1H  
PCPD2 84.00 usec  
PL2 -3.00 dB  
PL12 16.08 dB  
PL13 18.00 dB  
SFO2 400.1316005 MHz

F2 - Processing parameters  
SI 32768  
SF 100.6127328 MHz  
WDW EM  
SSB 0  
LB 1.00 Hz  
GB 0  
PC 1.40



# <sup>1</sup>H NMR spectrum for 2-cyclopentylidene-2-iodo-1-(4-methoxyphenyl)ethanone 4h

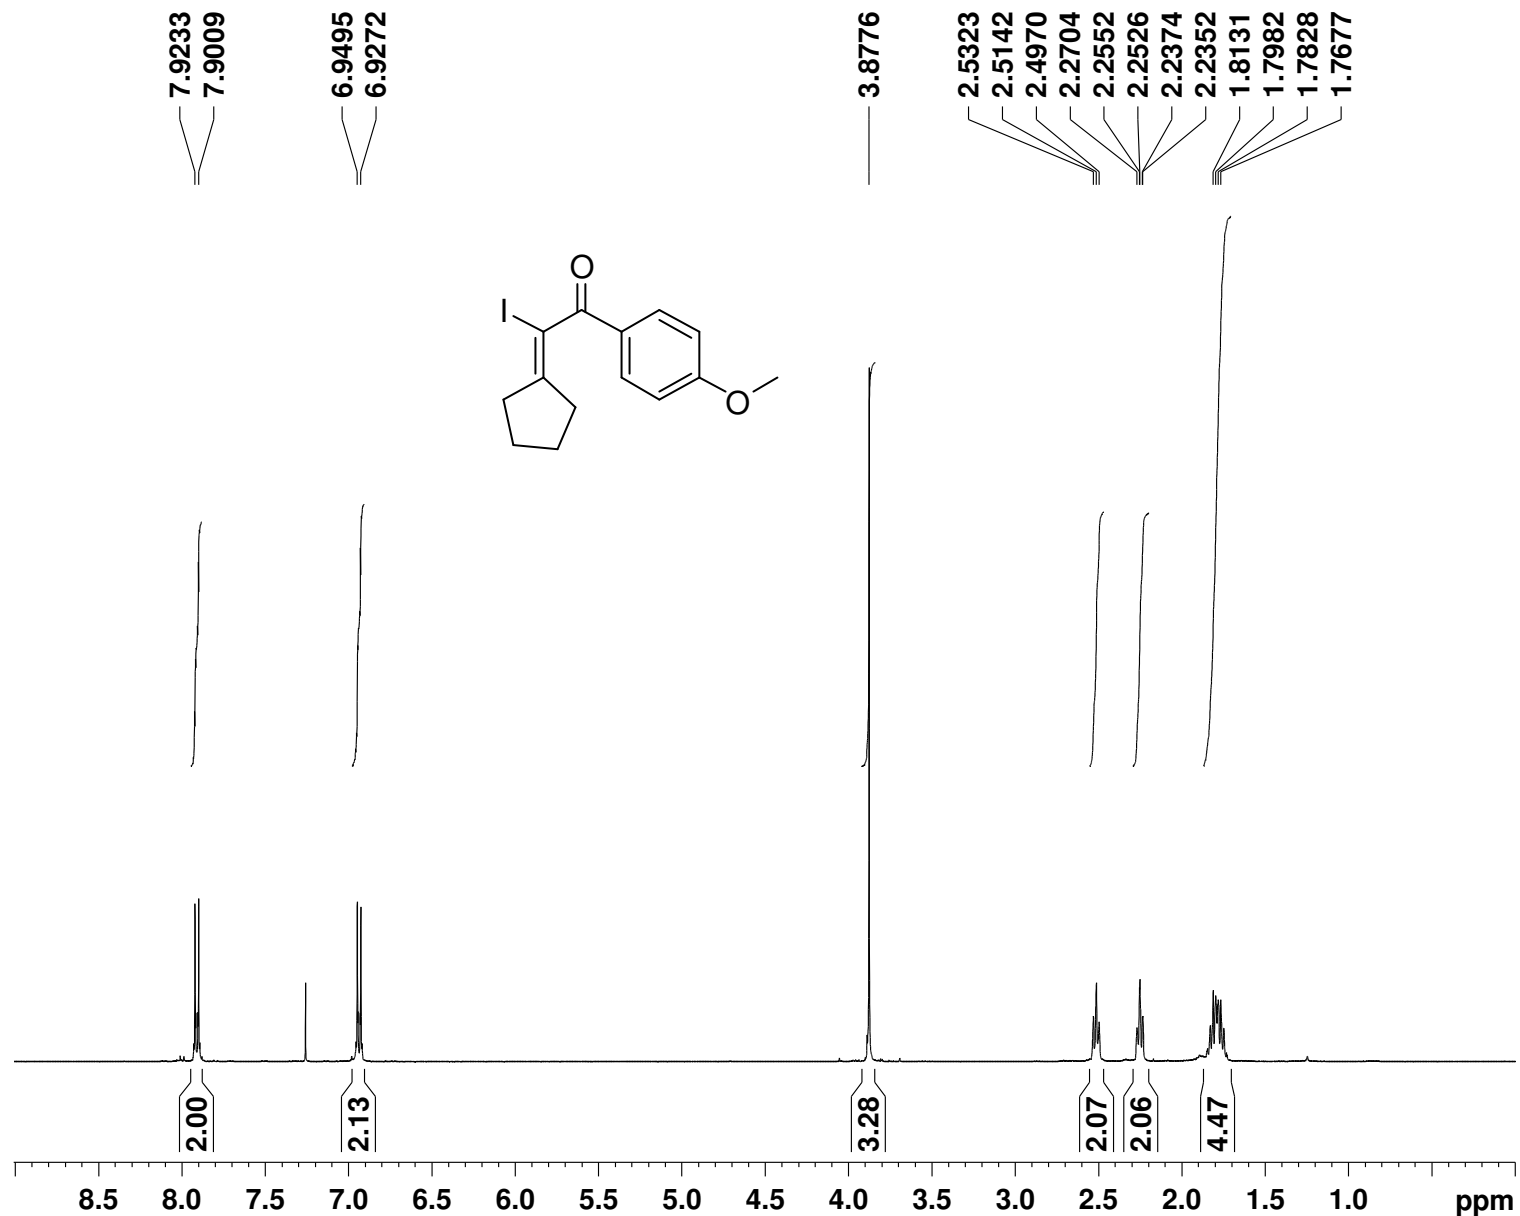

Current Data Parameters  
NAME ARM-1301  
EXPNO 7  
PROCNO 1

F2 - Acquisition Parameters  
Date\_ 20111020  
Time 9.44  
INSTRUM dp400  
PROBHD 5 mm QNP 1H/1  
PULPROG zg30  
TD 65536  
SOLVENT CDCl3  
NS 16  
DS 2  
SWH 8278.146 Hz  
FIDRES 0.126314 Hz  
AQ 3.9584243 sec  
RG 362  
DW 60.400 usec  
DE 6.00 usec  
TE 292.5 K  
D1 1.00000000 sec  
TD0 1

===== CHANNEL f1 =====  
NUC1 1H  
P1 8.40 usec  
PL1 -3.00 dB  
SFO1 400.1324710 MHz

F2 - Processing parameters  
SI 32768  
SF 400.1300097 MHz  
WDW EM  
SSB 0  
LB 0.30 Hz  
GB 0  
PC 1.00

<sup>13</sup>C NMR spectrum for 2-cyclopentylidene-2-iodo-1-(4-methoxyphenyl)ethanone 4h

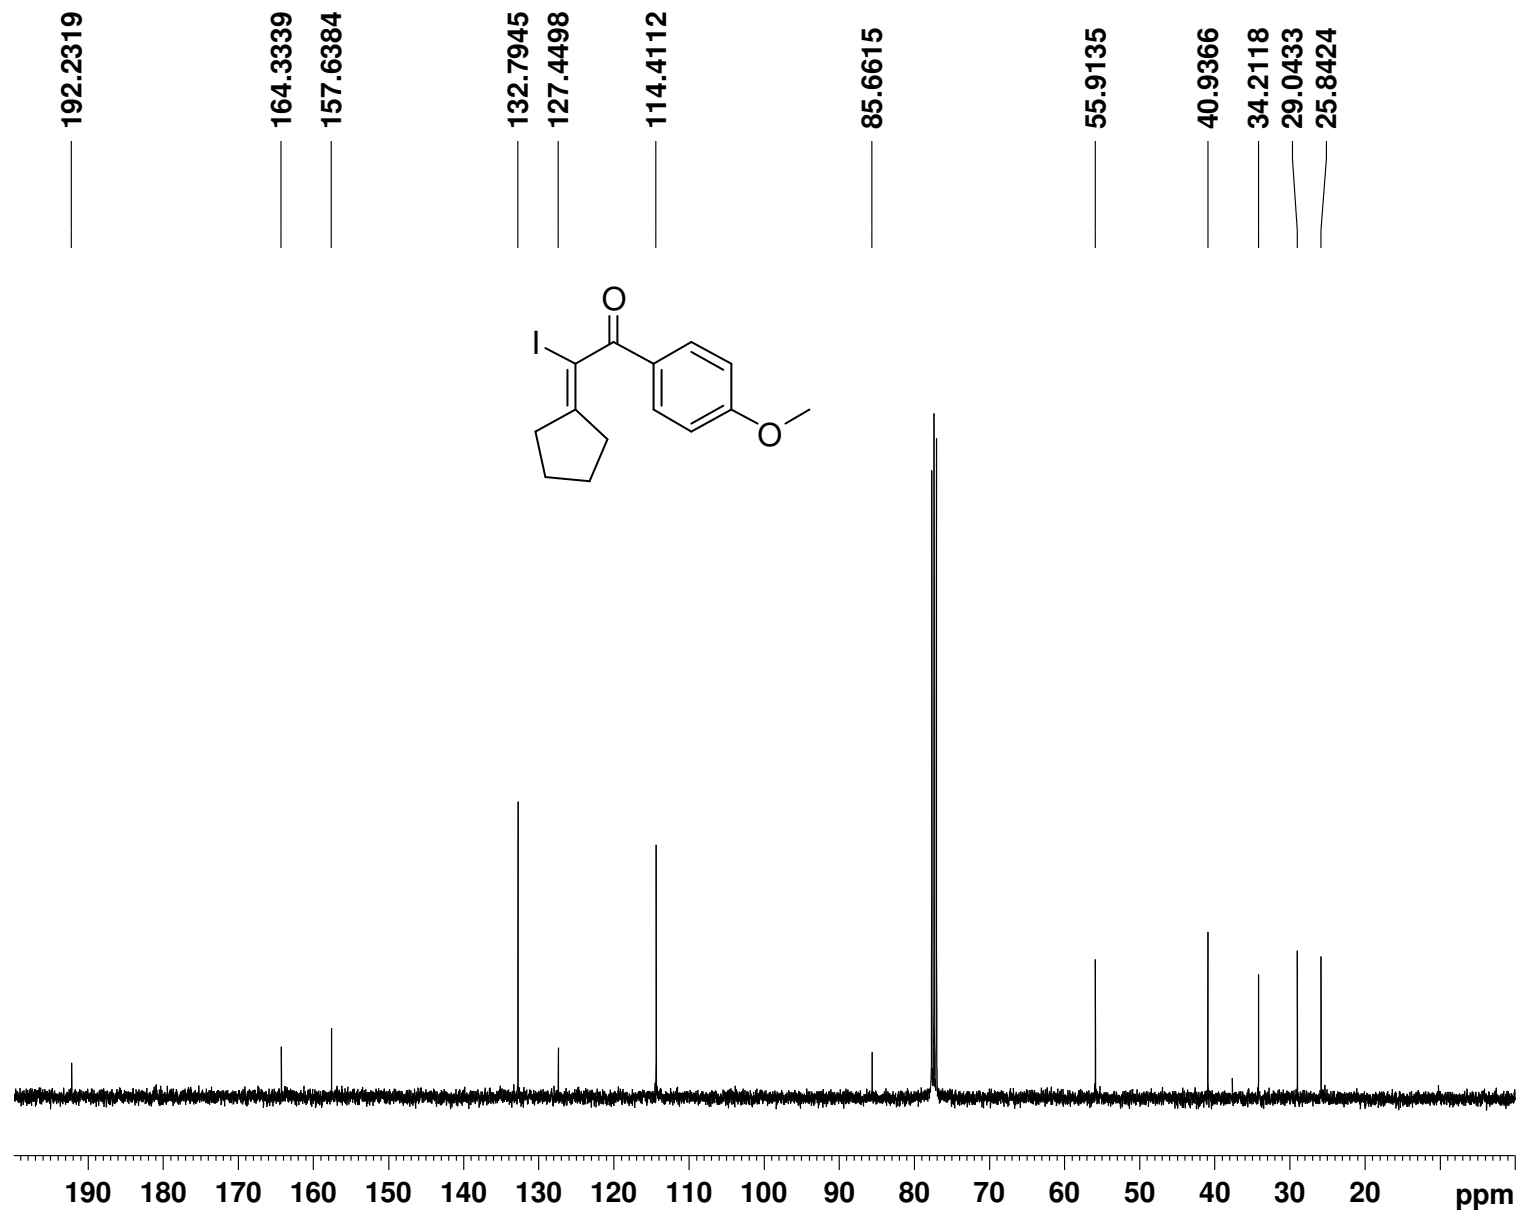

```
Current Data Parameters
NAME      ARM-1301
EXPNO    6
PROCNO   1

F2 - Acquisition Parameters
Date_    20110923
Time     9.57
INSTRUM  dpx400
PROBHD   5 mm QNP 1H/1
PULPROG  zgpg30
TD       65536
SOLVENT  CDCl3
NS       256
DS       4
SWH      23980.814 Hz
FIDRES   0.365918 Hz
AQ       1.3664756 sec
RG       18390.4
DW       20.850 usec
DE       6.00 usec
TE       292.0 K
D1       2.00000000 sec
d11      0.03000000 sec
DELTA    1.89999998 sec
TDO      8

===== CHANNEL f1 =====
NUC1     13C
P1       9.70 usec
PL1      -3.00 dB
SFO1     100.6228298 MHz

===== CHANNEL f2 =====
CPDPRG2  waltz16
NUC2     1H
PCPD2    84.00 usec
PL2      -3.00 dB
PL12     16.08 dB
PL13     18.00 dB
SFO2     400.1316005 MHz

F2 - Processing parameters
SI       32768
SF       100.6127329 MHz
WDW      EM
SSB      0
LB       1.00 Hz
GB       0
PC       1.40
```

# <sup>1</sup>H NMR spectrum for 2-cyclopentylidene-2-iodo-1-(4-(pentyloxy)phenyl)ethanone 4i

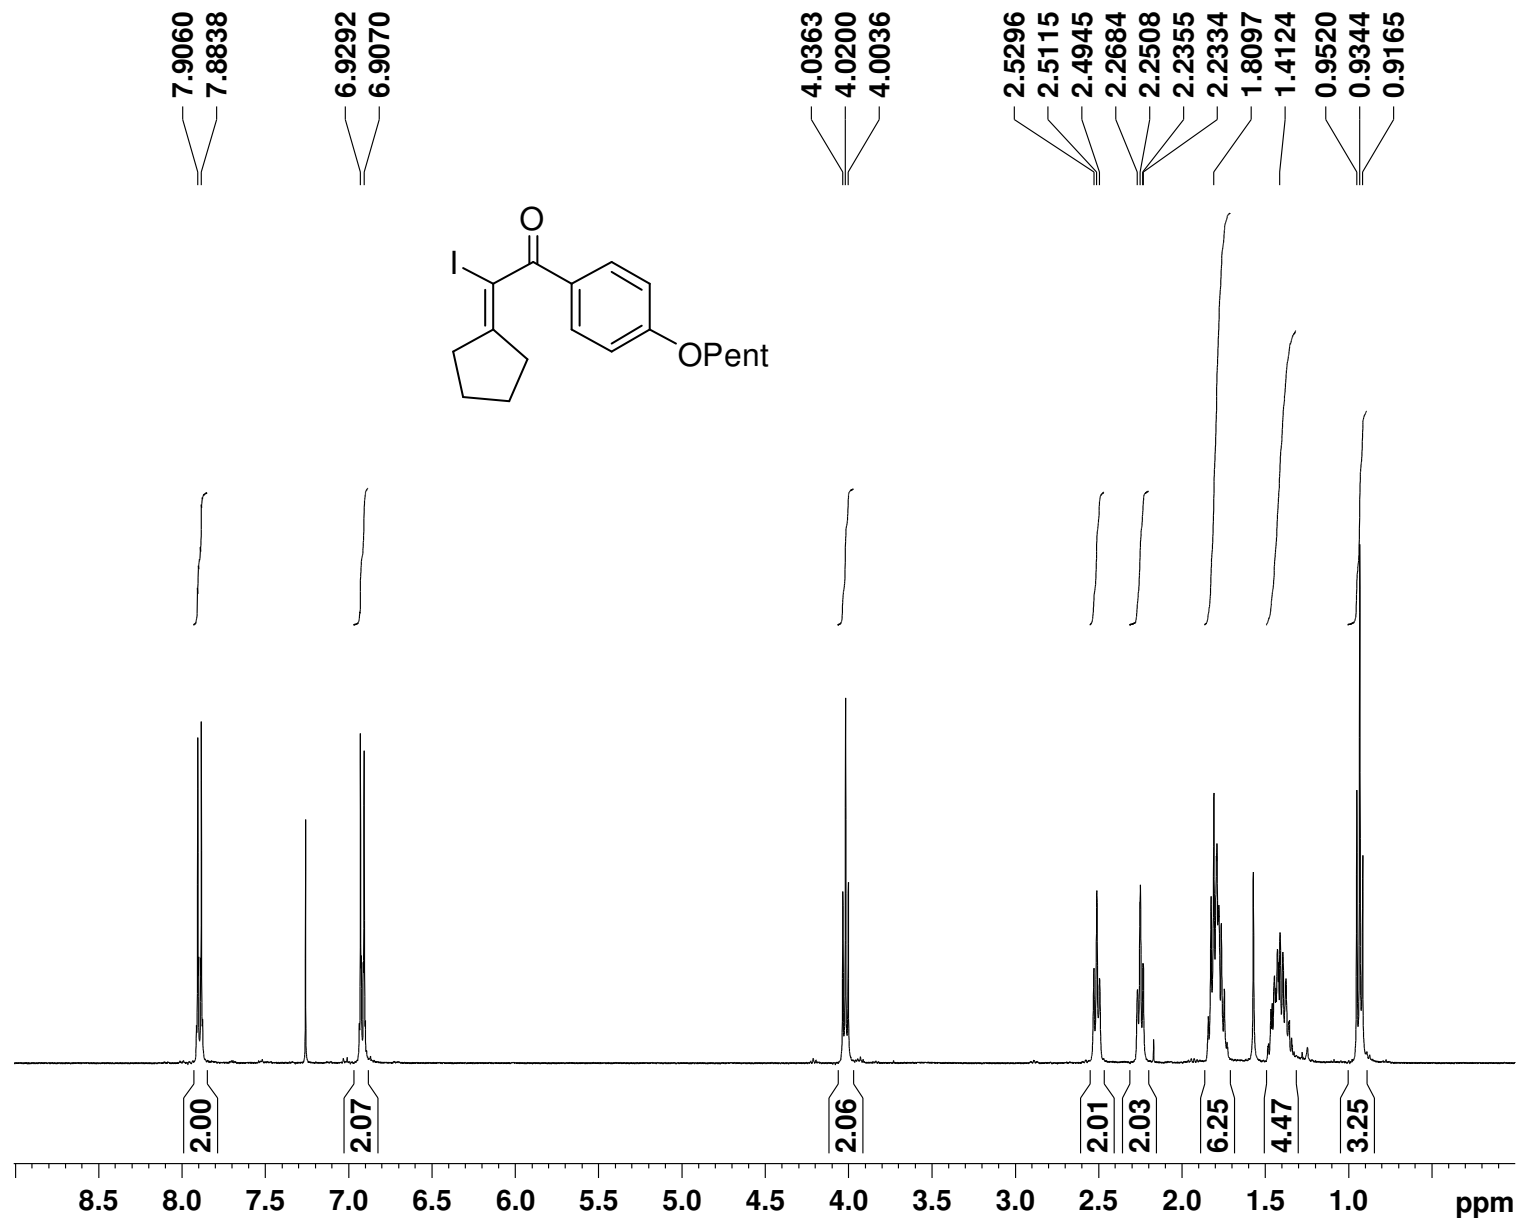

Current Data Parameters  
NAME ARM-1327  
EXPNO 4  
PROCNO 1

F2 - Acquisition Parameters  
Date\_ 20111020  
Time 9.56  
INSTRUM dp400  
PROBHD 5 mm QNP 1H/1  
PULPROG zg30  
TD 65536  
SOLVENT CDCl3  
NS 16  
DS 2  
SWH 8278.146 Hz  
FIDRES 0.126314 Hz  
AQ 3.9584243 sec  
RG 322.5  
DW 60.400 usec  
DE 6.00 usec  
TE 292.5 K  
D1 1.00000000 sec  
TD0 1

===== CHANNEL f1 =====  
NUC1 1H  
P1 8.40 usec  
PL1 -3.00 dB  
SFO1 400.1324710 MHz

F2 - Processing parameters  
SI 32768  
SF 400.1300101 MHz  
WDW EM  
SSB 0  
LB 0.30 Hz  
GB 0  
PC 1.00

### <sup>13</sup>C NMR spectrum for 2-cyclopentylidene-2-iodo-1-(4-(pentyloxy)phenyl)ethanone 4i

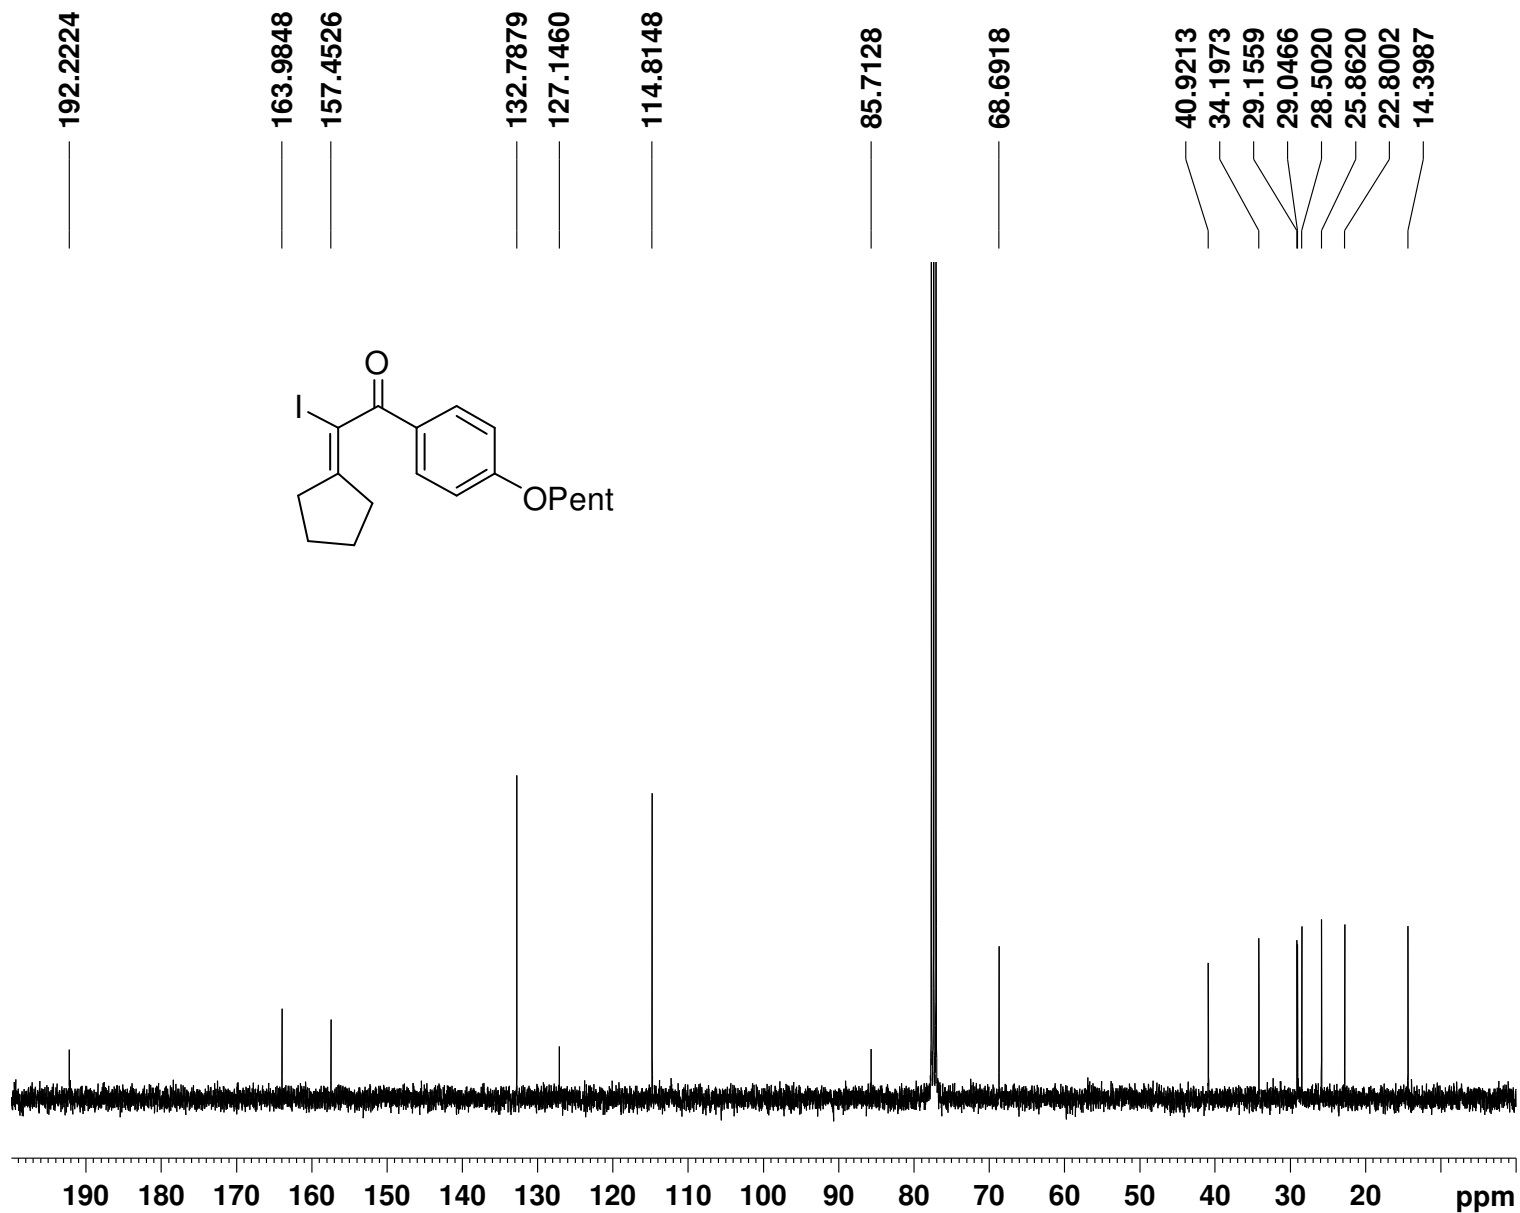

Current Data Parameters  
NAME ARM-1327  
EXPNO 5  
PROCNO 1

F2 - Acquisition Parameters  
Date\_ 20111020  
Time 11.14  
INSTRUM dpx400  
PROBHD 5 mm QNP 1H/1  
PULPROG zgpg30  
TD 65536  
SOLVENT CDCl3  
NS 256  
DS 4  
SWH 23980.814 Hz  
FIDRES 0.365918 Hz  
AQ 1.3664756 sec  
RG 11585.2  
DW 20.850 usec  
DE 6.00 usec  
TE 293.2 K  
D1 2.00000000 sec  
d11 0.03000000 sec  
DELTA 1.89999998 sec  
TD0 8

==== CHANNEL f1 =====  
NUC1 13C  
P1 9.70 usec  
PL1 -3.00 dB  
SFO1 100.6228298 MHz

==== CHANNEL f2 =====  
CPDPRG2 waltz16  
NUC2 1H  
PCPD2 84.00 usec  
PL2 -3.00 dB  
PL12 16.08 dB  
PL13 18.00 dB  
SFO2 400.1316005 MHz

F2 - Processing parameters  
SI 32768  
SF 100.6127323 MHz  
WDW EM  
SSB 0  
LB 1.00 Hz  
GB 0  
PC 1.40

# <sup>1</sup>H NMR spectrum for 2-cyclopentylidene-1-(3-fluorophenyl)-2-iodoethanone 4j

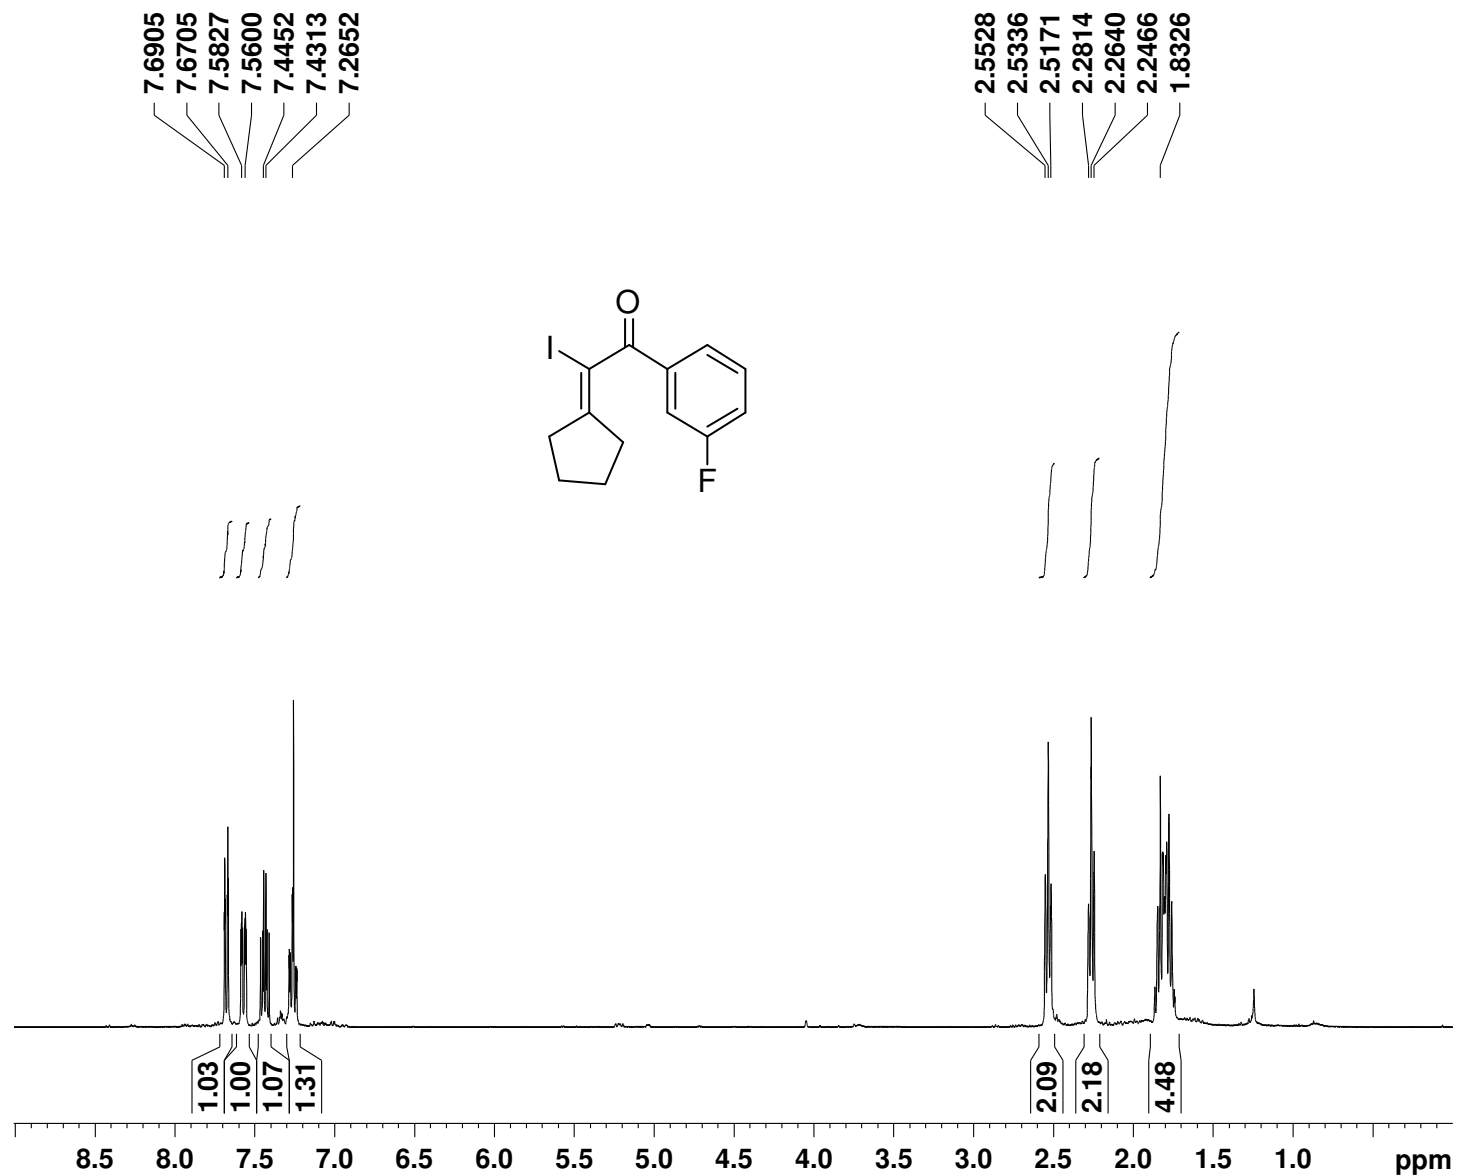

Current Data Parameters  
NAME ARM-1369  
EXPNO 6  
PROCNO 1

F2 - Acquisition Parameters  
Date\_ 20111027  
Time 16.13  
INSTRUM dpx400  
PROBHD 5 mm QNP 1H/1  
PULPROG zg30  
TD 65536  
SOLVENT CDCl3  
NS 16  
DS 2  
SWH 8278.146 Hz  
FIDRES 0.126314 Hz  
AQ 3.9584243 sec  
RG 256  
DW 60.400 usec  
DE 6.00 usec  
TE 292.6 K  
D1 1.00000000 sec  
TDO 1

===== CHANNEL f1 =====  
NUC1 1H  
P1 8.40 usec  
PL1 -3.00 dB  
SFO1 400.1324710 MHz

F2 - Processing parameters  
SI 32768  
SF 400.1300103 MHz  
WDW EM  
SSB 0  
LB 0.30 Hz  
GB 0  
PC 1.00

### <sup>13</sup>C NMR spectrum for 2-cyclopentylidene-1-(3-fluorophenyl)-2-iodoethanone 4j

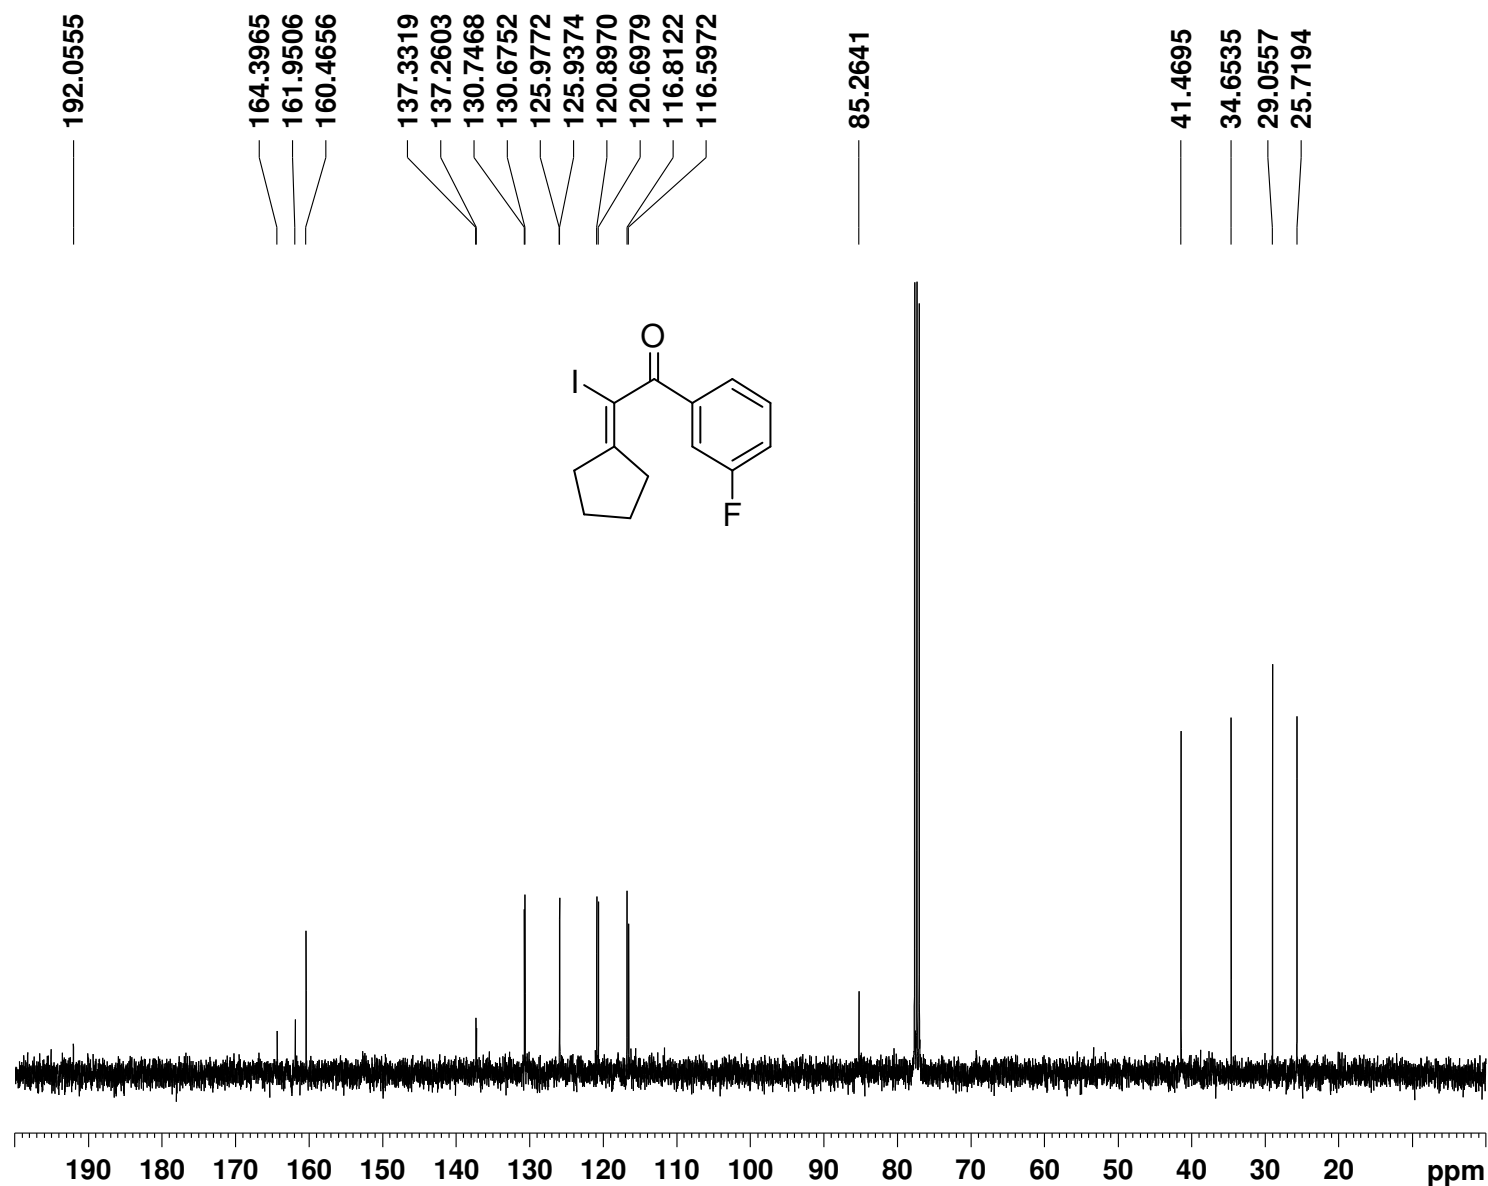

```
Current Data Parameters
NAME      ARM-1369
EXPNO     7
PROCNO    1

F2 - Acquisition Parameters
Date_     20111027
Time      16.16
INSTRUM   dpx400
PROBHD    5 mm QNP 1H/1
PULPROG   zgpg30
TD        65536
SOLVENT   CDCl3
NS        96
DS        4
SWH       23980.814 Hz
FIDRES    0.365918 Hz
AQ        1.3664756 sec
RG        6502
DW        20.850 usec
DE        6.00 usec
TE        293.1 K
D1        2.0000000 sec
d11       0.0300000 sec
DELTA    1.89999998 sec
TDO      8

===== CHANNEL f1 =====
NUC1      13C
P1        9.70 usec
PL1       -3.00 dB
SFO1     100.6228298 MHz

===== CHANNEL f2 =====
CPDPRG2   waltz16
NUC2      1H
PCPD2     84.00 usec
PL2       -3.00 dB
PL12     16.08 dB
PL13     18.00 dB
SFO2     400.1316005 MHz

F2 - Processing parameters
SI        32768
SF        100.6127349 MHz
WDW       EM
SSB       0
LB        1.00 Hz
GB        0
PC        1.40
```

### <sup>1</sup>H NMR spectrum for 1-(4-*tert*-butylphenyl)-2-cyclohexylidene-2-iodoethanone 4k

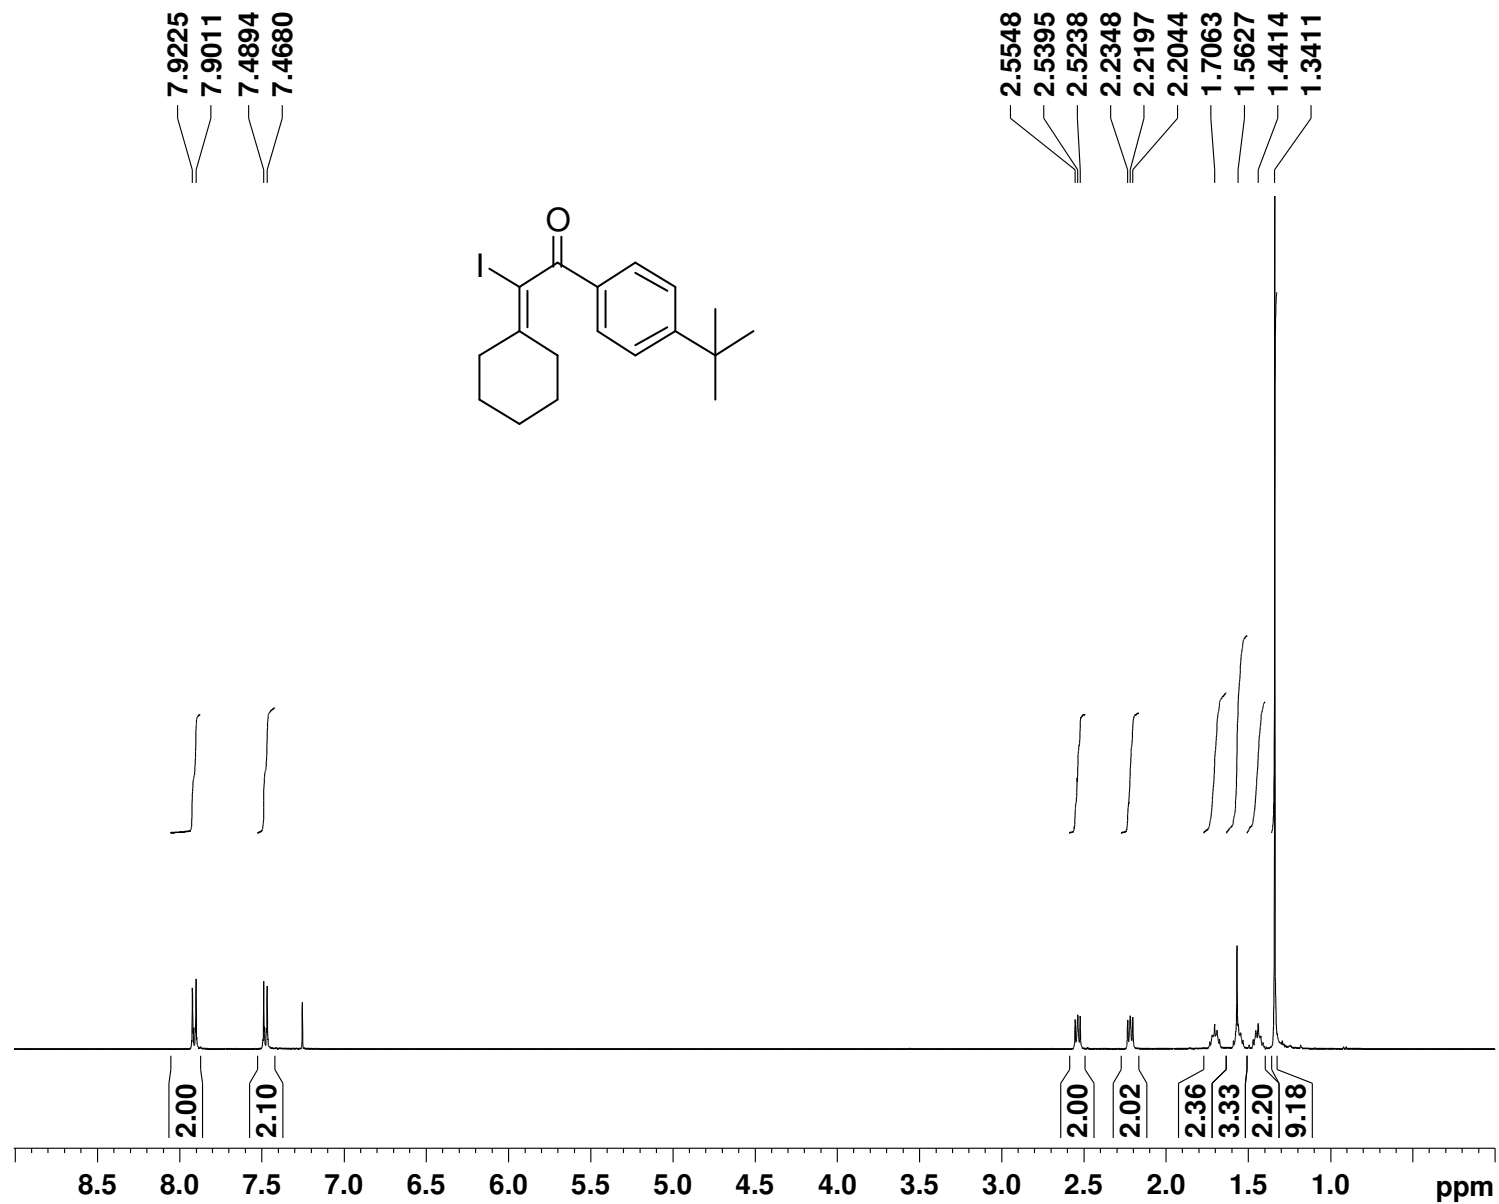

Current Data Parameters  
NAME ARM-1341  
EXPNO 3  
PROCNO 1

F2 - Acquisition Parameters  
Date\_ 20111012  
Time 10.24  
INSTRUM dpx400  
PROBHD 5 mm QNP 1H/1  
PULPROG zg30  
TD 65536  
SOLVENT CDCl3  
NS 16  
DS 2  
SWH 8278.146 Hz  
FIDRES 0.126314 Hz  
AQ 3.9584243 sec  
RG 287.4  
DW 60.400 usec  
DE 6.00 usec  
TE 293.2 K  
D1 1.00000000 sec  
TD0 1

===== CHANNEL f1 =====  
NUC1 1H  
P1 8.40 usec  
PL1 -3.00 dB  
SFO1 400.1324710 MHz

F2 - Processing parameters  
SI 32768  
SF 400.1300119 MHz  
WDW EM  
SSB 0  
LB 0.30 Hz  
GB 0  
PC 1.00

<sup>13</sup>C NMR spectrum for 1-(4-*tert*-butylphenyl)-2-cyclohexylidene-2-iodoethanone 4k

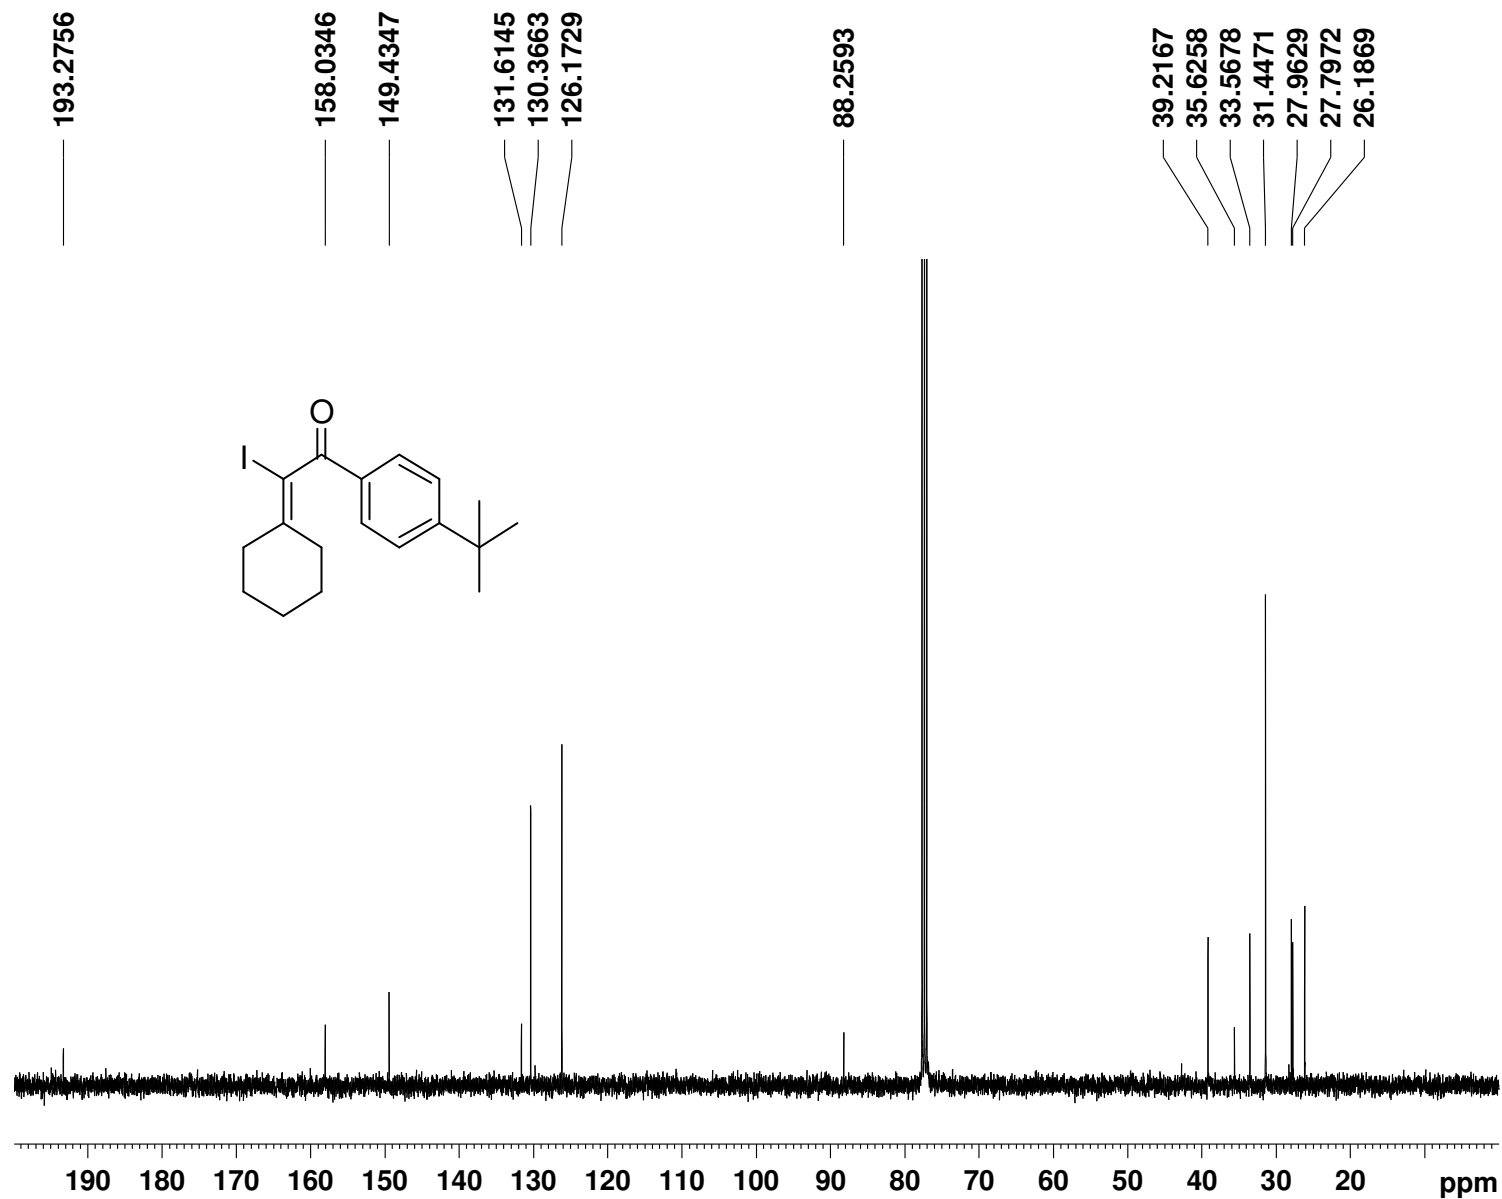

Current Data Parameters  
NAME ARM-1341  
EXPNO 4  
PROCNO 1

F2 - Acquisition Parameters  
Date\_ 20111012  
Time 10.27  
INSTRUM dpx400  
PROBHD 5 mm QNP 1H/1  
PULPROG zgpg30  
TD 65536  
SOLVENT CDC13  
NS 256  
DS 4  
SWH 23980.814 Hz  
FIDRES 0.365918 Hz  
AQ 1.364756 sec  
RG 11585.2  
DW 20.850 usec  
DE 6.00 usec  
TE 293.3 K  
D1 2.00000000 sec  
d11 0.03000000 sec  
DELTA 1.89999998 sec  
TDO 8

===== CHANNEL f1 =====  
NUC1 13C  
P1 9.70 usec  
PL1 -3.00 dB  
SFO1 100.6228298 MHz

===== CHANNEL f2 =====  
CPDPRG2 waltz16  
NUC2 1H  
PCPD2 84.00 usec  
PL2 -3.00 dB  
PL12 16.08 dB  
PL13 18.00 dB  
SFO2 400.1316005 MHz

F2 - Processing parameters  
SI 32768  
SF 100.6127332 MHz  
WDW EM  
SSB 0  
LB 1.00 Hz  
GB 0  
PC 1.40



# <sup>1</sup>H NMR spectrum for 2-cycloheptylidene-2-iodo-1-phenylethanone 4I

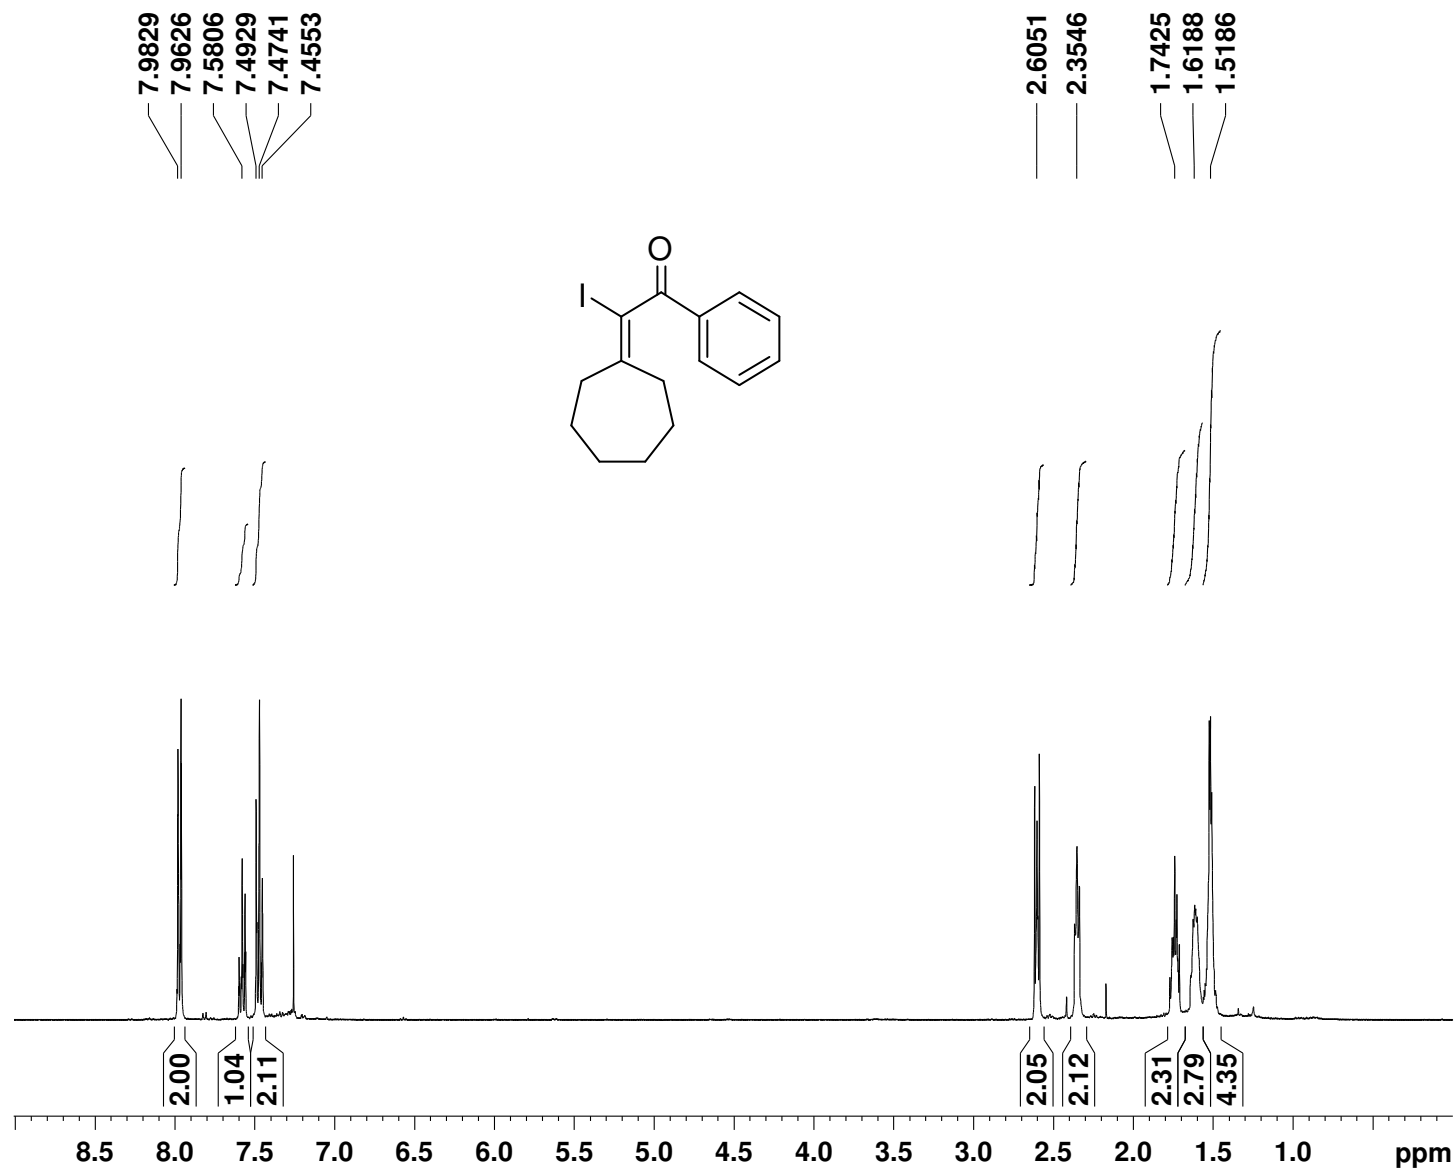

Current Data Parameters  
NAME ARM-1381\_500  
EXPNO 50  
PROCNO 1

F2 - Acquisition Parameters  
Date\_ 20111128  
Time 15.06  
INSTRUM dpx400  
PROBHD 5 mm QNP 1H/1  
PULPROG zg30  
TD 65536  
SOLVENT CDCl3  
NS 16  
DS 2  
SWH 8278.146 Hz  
FIDRES 0.126314 Hz  
AQ 3.9584243 sec  
RG 228.1  
RQ 60.400 usec  
DW 2.919 usec  
DE 6.00 usec  
TE 291.9 K  
D1 1.00000000 sec  
TDO 1

===== CHANNEL f1 =====  
NUC1 1H  
P1 8.40 usec  
PL1 -3.00 dB  
SFO1 400.1324710 MHz

F2 - Processing parameters  
SI 32768  
SF 400.1300100 MHz  
WDW EM  
SSB 0  
LB 0.30 Hz  
GB 0  
PC 1.00

<sup>13</sup>C NMR spectrum for 2-cycloheptylidene-2-iodo-1-phenylethanone 4l

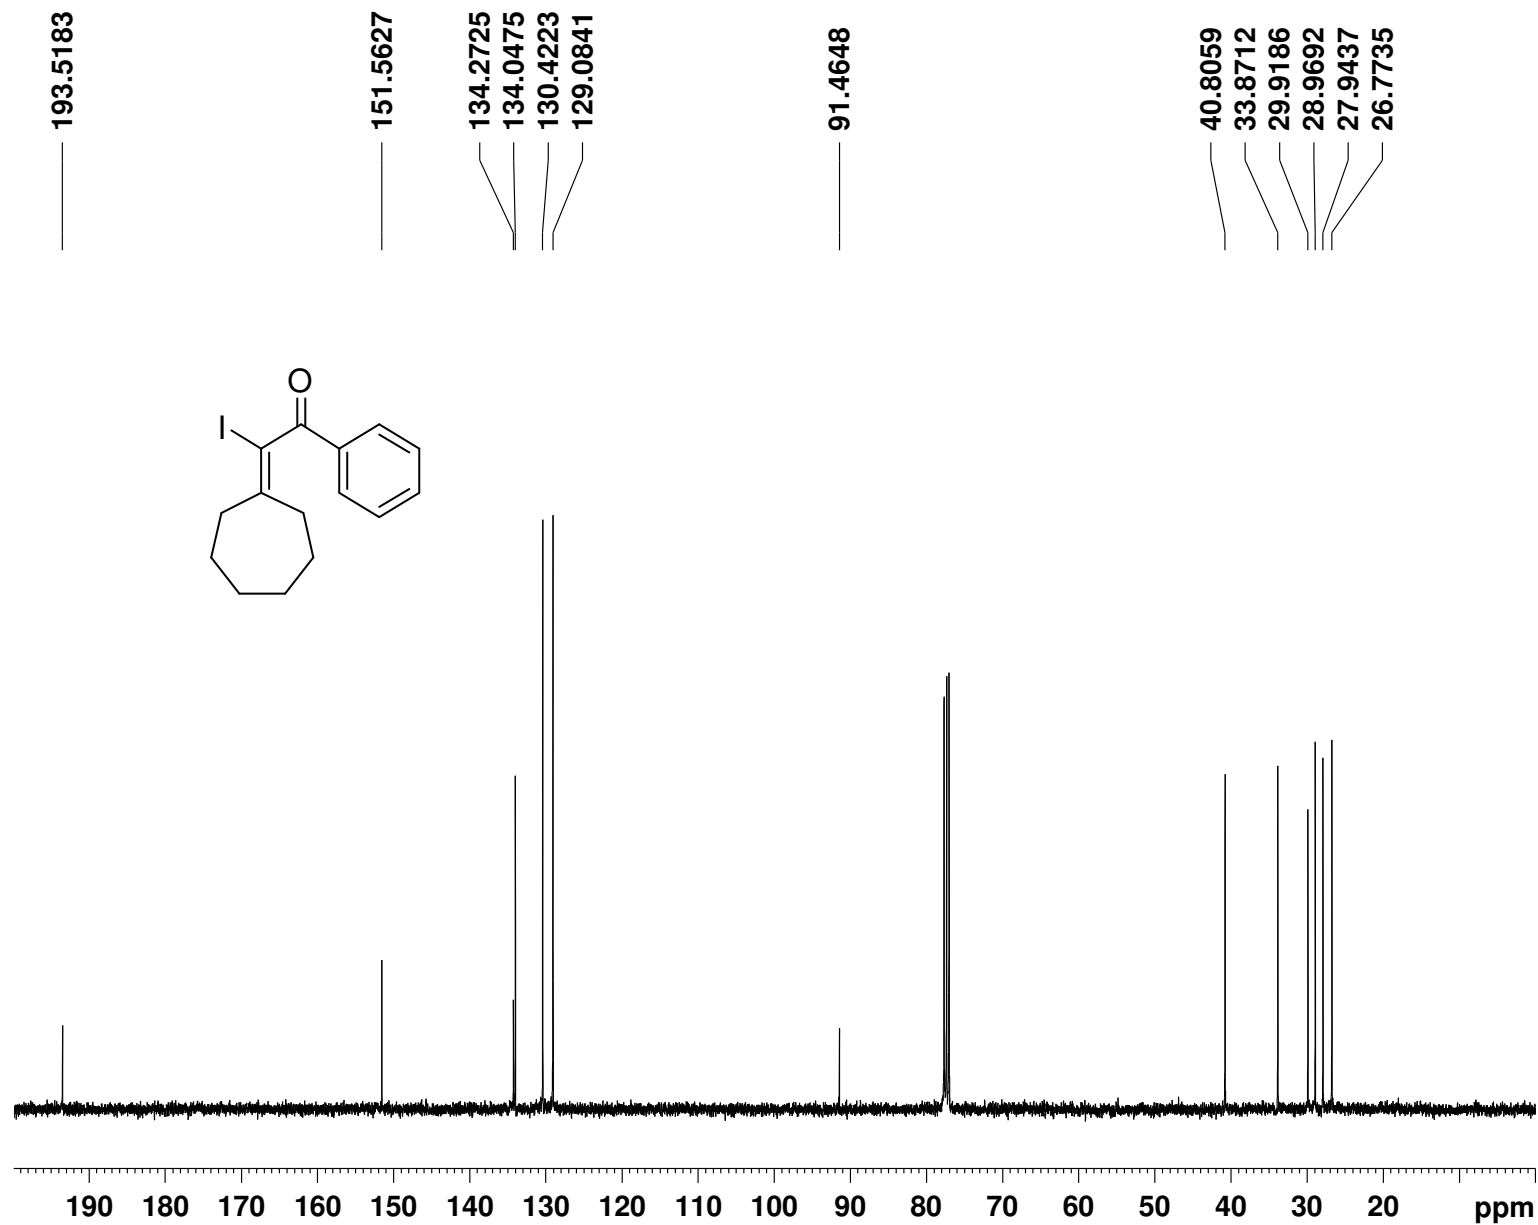

Current Data Parameters  
NAME ARM-1329  
EXPNO 5  
PROCNO 1

F2 - Acquisition Parameters  
Date\_ 20110923  
Time 13.57  
INSTRUM dpx400  
PROBHD 5 mm QNP 1H/1  
PULPROG zgpg30  
TD 65536  
SOLVENT CDCl3  
NS 256  
DS 4  
SWH 23980.814 Hz  
FIDRES 0.365918 Hz  
AQ 1.3664756 sec  
RG 16384  
DW 20.850 usec  
DE 6.00 usec  
TE 292.7 K  
D1 2.00000000 sec  
d11 0.03000000 sec  
DELTA 1.89999998 sec  
TD0 8

===== CHANNEL f1 =====  
NUC1 13C  
P1 9.70 usec  
PL1 -3.00 dB  
SFO1 100.6228298 MHz

===== CHANNEL f2 =====  
CPDPRG2 waltz16  
NUC2 1H  
FPCPD2 84.00 usec  
PL2 -3.00 dB  
PL12 16.08 dB  
PL13 18.00 dB  
SFO2 400.1316005 MHz

F2 - Processing parameters  
SI 32768  
SF 100.6127365 MHz  
WDW EM  
SSB 0  
LB 1.00 Hz  
GB 0  
PC 1.40

# <sup>1</sup>H NMR spectrum for 1-(4-*tert*-butylphenyl)-2-cycloheptylidene-2-iodoethanone 4m

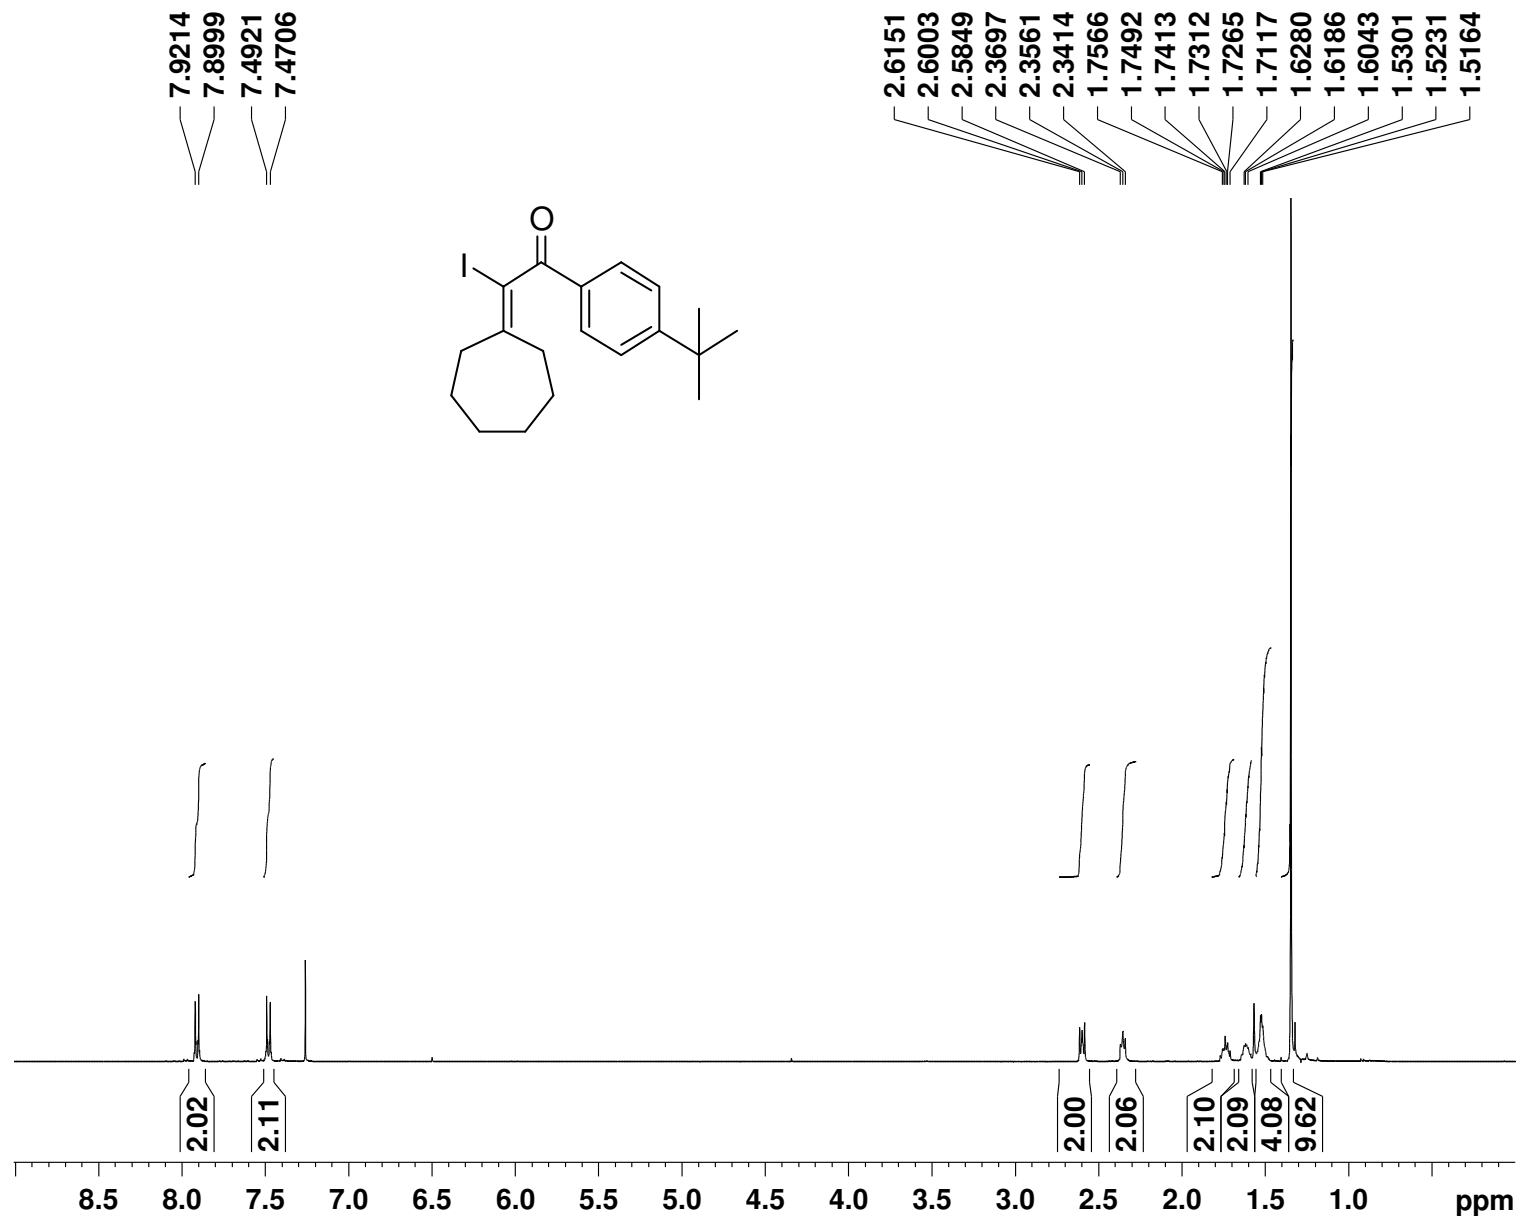

Current Data Parameters  
NAME ARM-1332  
EXPNO 5  
PROCNO 1

F2 - Acquisition Parameters  
Date\_ 20110927  
Time 9.44  
INSTRUM dpx400  
PROBHD 5 mm QNP 1H/1  
PULPROG zg30  
TD 65536  
SOLVENT CDCl3  
NS 16  
DS 2  
SWH 8278.146 Hz  
FIDRES 0.126314 Hz  
AQ 3.9584243 sec  
RG 322.5  
DW 60.400 usec  
DE 6.00 usec  
TE 292.2 K  
D1 1.00000000 sec  
TD0 1

===== CHANNEL f1 =====  
NUC1 1H  
P1 8.40 usec  
PL1 -3.00 dB  
SFO1 400.1324710 MHz

F2 - Processing parameters  
SI 32768  
SF 400.1300096 MHz  
WDW EM  
SSB 0  
LB 0.30 Hz  
GB 0  
PC 1.00

<sup>13</sup>C NMR spectrum for 1-(4-*tert*-butylphenyl)-2-cycloheptylidene-2-iodoethanone 4m

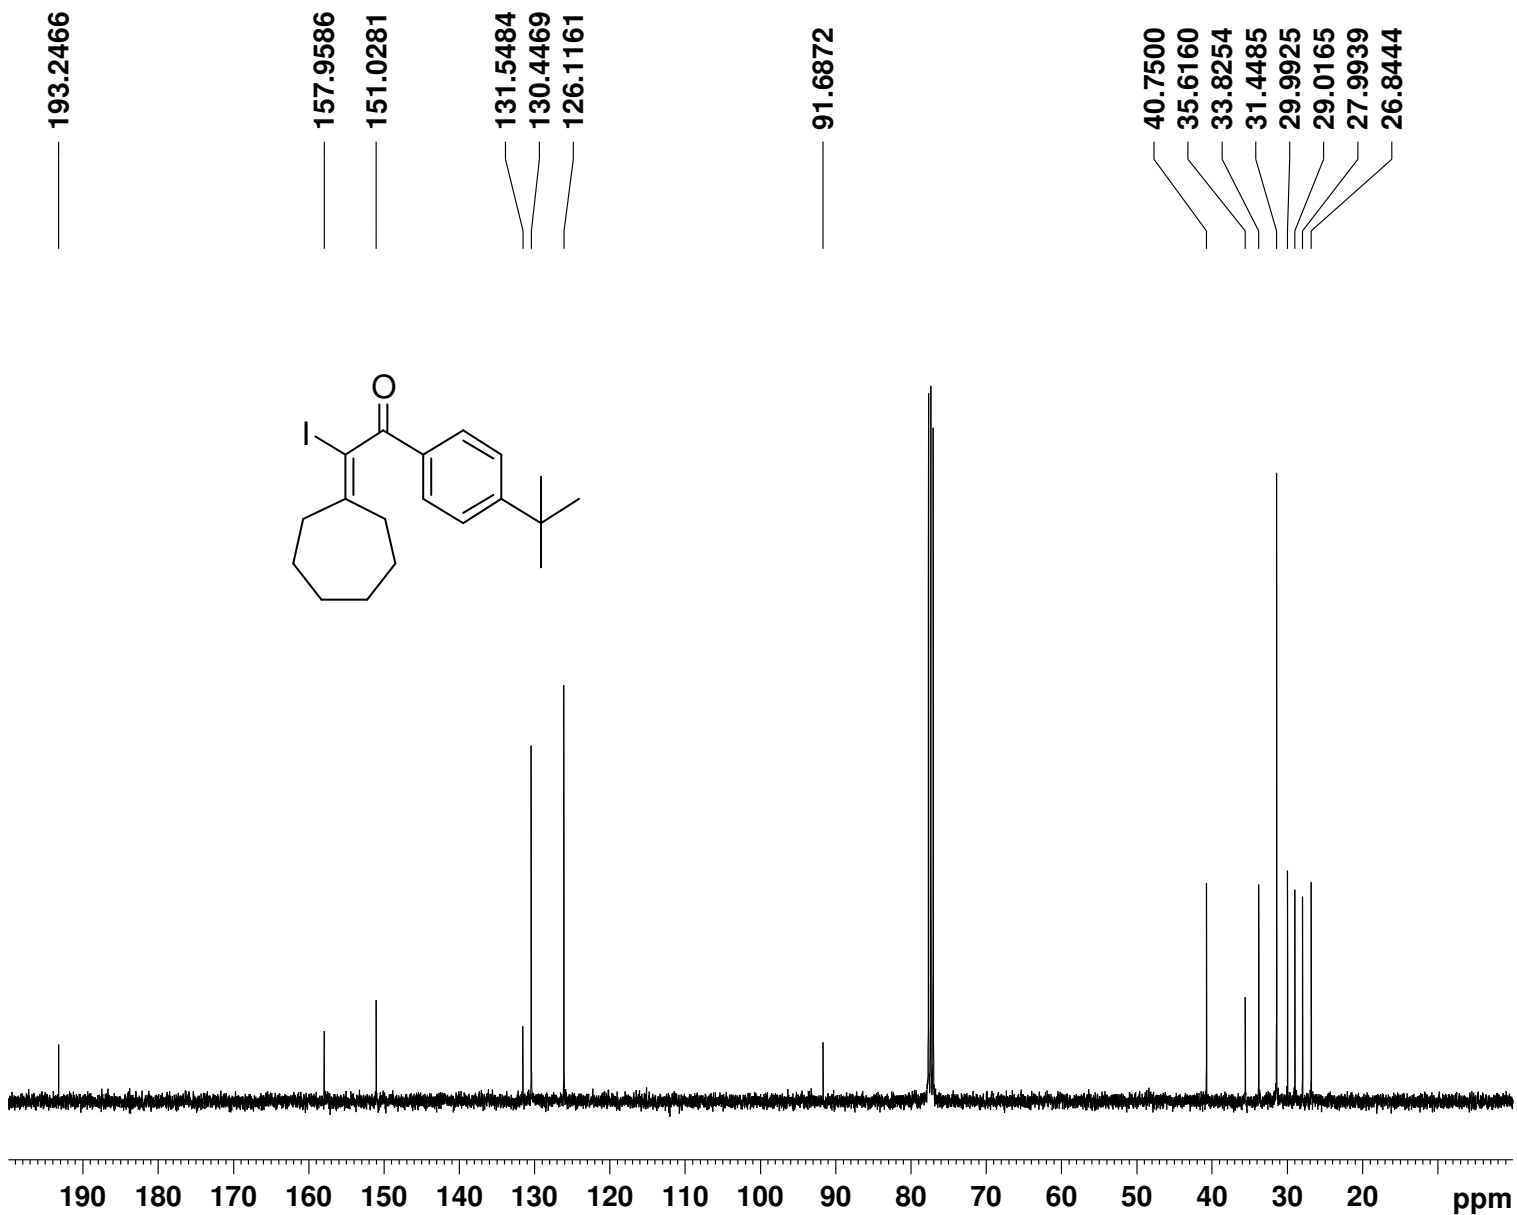

```
Current Data Parameters
NAME      ARM-1307
EXPNO     4
PROCNO    1

F2 - Acquisition Parameters
Date_     20111021
Time      12.01
INSTRUM   dpx400
PROBHD    5 mm QNP 1H/1
PULPROG   zgpg30
TD         65536
SOLVENT   CDCl3
NS         256
DS         4
SWH        23980.814 Hz
FIDRES     0.365918 Hz
AQ         1.3664756 sec
RG         20642.5
DW         20.850 usec
DE         6.00 usec
TE         293.5 K
D1         2.00000000 sec
d11        0.03000000 sec
DELTA     1.89999998 sec
TD0        8

===== CHANNEL f1 =====
NUC1       13C
P1         9.70 usec
PL1        -3.00 dB
SFO1       100.6228298 MHz

===== CHANNEL f2 =====
CPDPRG2    waltz16
NUC2       1H
PCPD2      84.00 usec
PL2        -3.00 dB
PL12       16.08 dB
PL13       18.00 dB
SFO2       400.1316005 MHz

F2 - Processing parameters
SI         32768
SF         100.6127338 MHz
WDW        EM
SSB        0
LB         1.00 Hz
GB         0
PC         1.40
```

### <sup>1</sup>H NMR spectrum for 1-(4-*tert*-butylphenyl)-2-cyclooctylidene-2-iodoethanone 4n

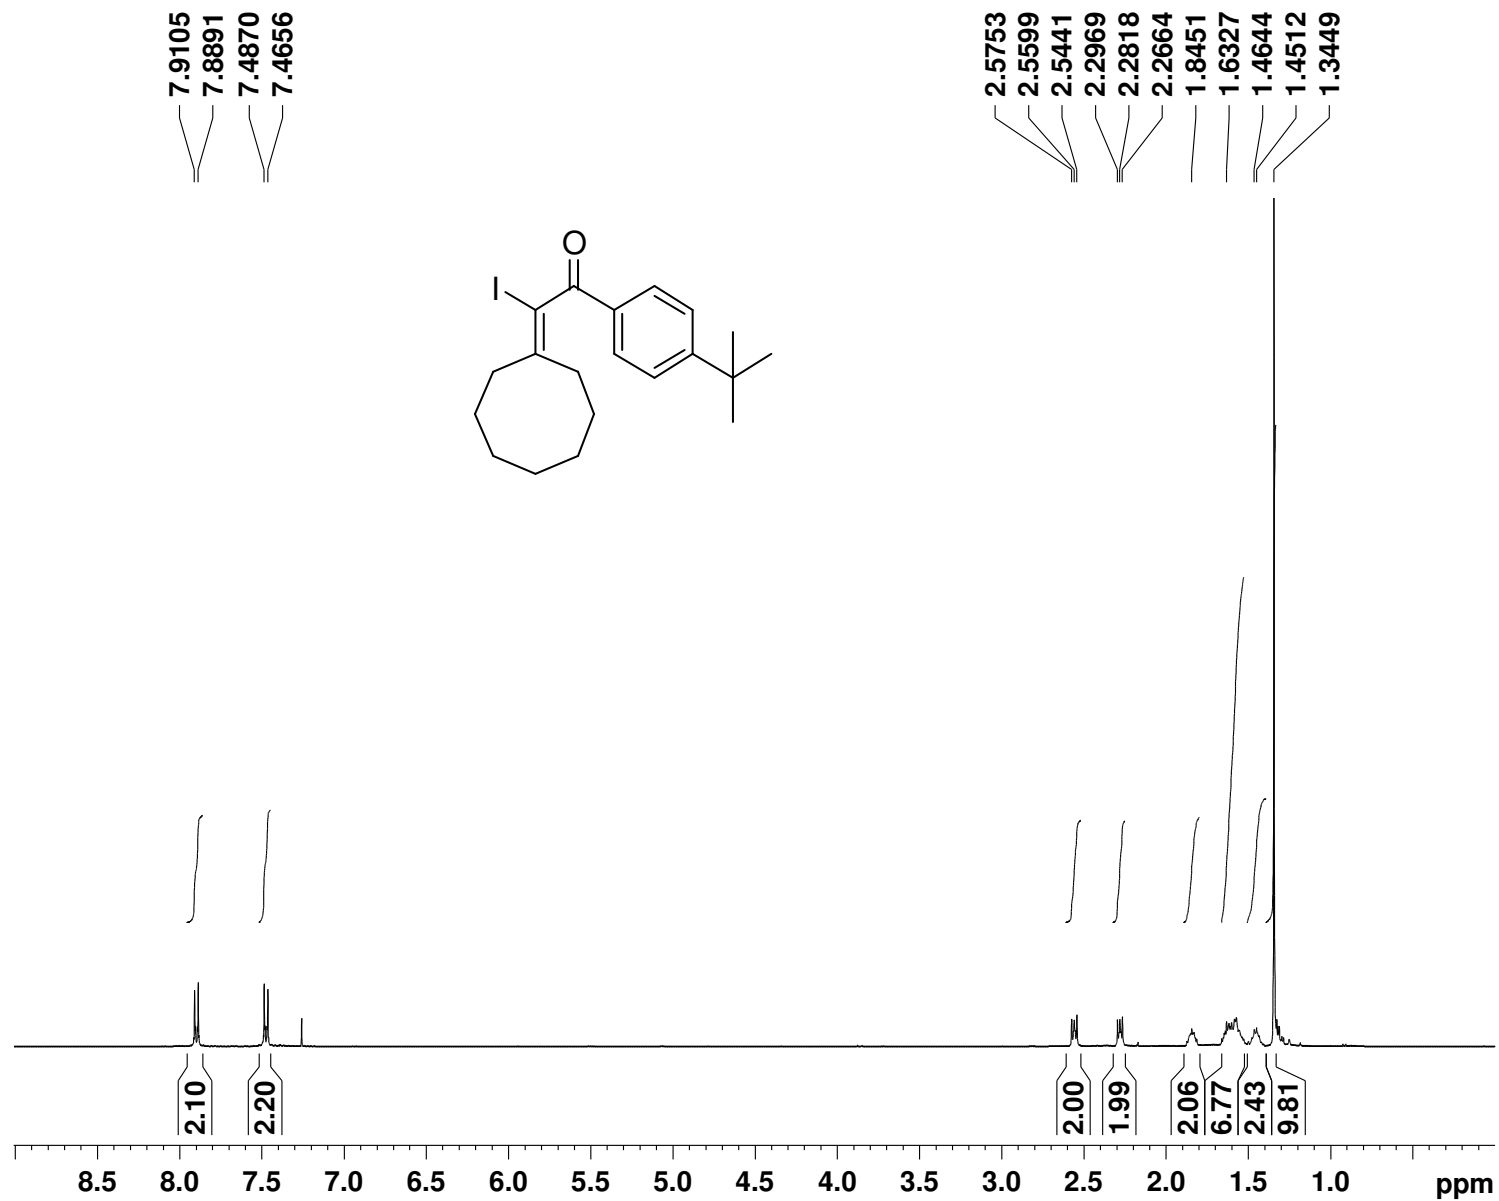

Current Data Parameters  
NAME ARM-1334  
EXPNO 5  
PROCNO 1

F2 - Acquisition Parameters  
Date\_ 20111020  
Time 10.08  
INSTRUM dpx400  
PROBHD 5 mm QNP 1H/1  
PULPROG zg30  
TD 65536  
SOLVENT CDCl3  
NS 16  
DS 2  
SWH 8278.146 Hz  
FIDRES 0.126314 Hz  
AQ 3.9584243 sec  
RG 181  
DW 60.400 usec  
DE 6.00 usec  
TE 292.5 K  
D1 1.00000000 sec  
TDO 1

===== CHANNEL f1 =====  
NUC1 1H  
P1 8.40 usec  
PL1 -3.00 dB  
SFO1 400.1324710 MHz

F2 - Processing parameters  
SI 32768  
SF 400.1300098 MHz  
WDW EM  
SSB 0  
LB 0.30 Hz  
GB 0  
PC 1.00

### <sup>13</sup>C NMR spectrum for 1-(4-*tert*-butylphenyl)-2-cyclooctylidene-2-iodoethanone 4n

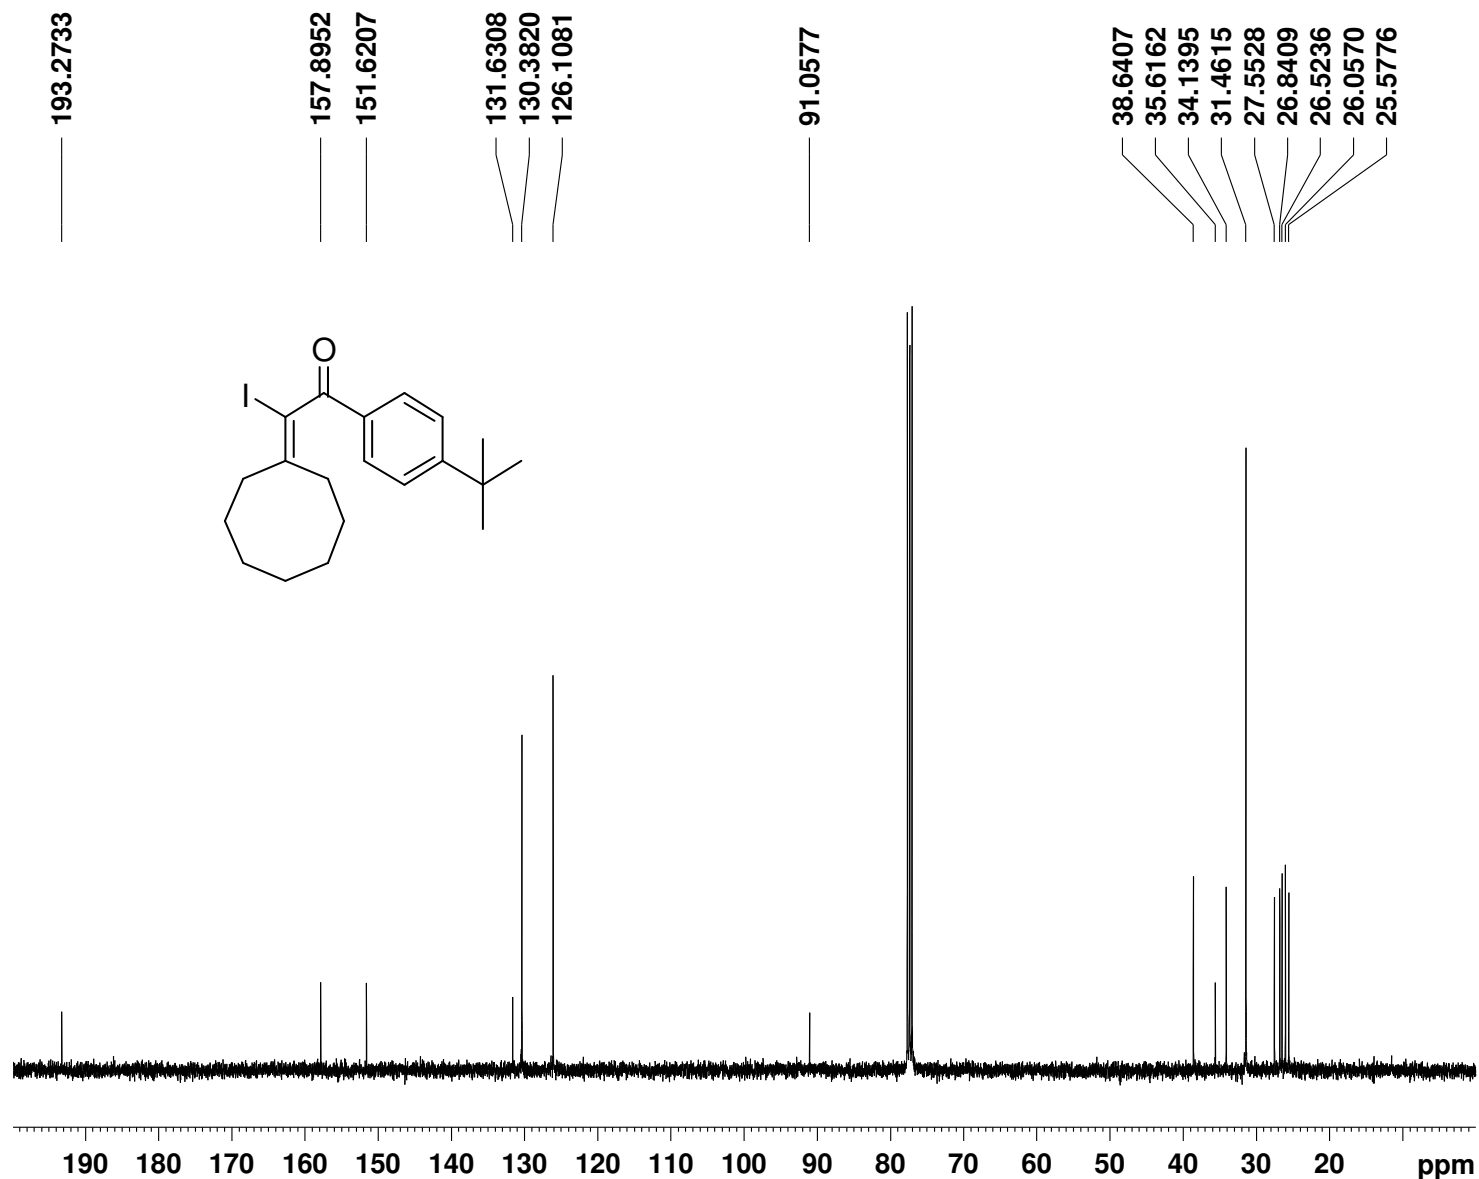

Current Data Parameters  
NAME ARM-1334  
EXPNO 6  
PROCNO 1

F2 - Acquisition Parameters  
Date\_ 20111020  
Time 10.11  
INSTRUM dpx400  
PROBHD 5 mm QNP 1H/1  
PULPROG zgpg30  
TD 65536  
SOLVENT CDCl3  
NS 256  
DS 4  
SWH 23980.814 Hz  
FIDRES 0.365918 Hz  
AQ 1.3664756 sec  
RG 9195.2  
DW 20.850 usec  
DE 6.00 usec  
TE 292.9 K  
D1 2.0000000 sec  
d11 0.0300000 sec  
DELTA 1.89999998 sec  
TDO 8

===== CHANNEL f1 =====  
NUC1 13C  
P1 9.70 usec  
PL1 -3.00 dB  
SFO1 100.6228298 MHz

===== CHANNEL f2 =====  
CPDPRG2 waltz16  
NUC2 1H  
PCPD2 84.00 usec  
PL2 -3.00 dB  
PL12 16.08 dB  
PL13 18.00 dB  
SFO2 400.1316005 MHz

F2 - Processing parameters  
SI 32768  
SF 100.6127331 MHz  
WDW EM  
SSB 0  
LB 1.00 Hz  
GB 0  
PC 1.40

<sup>1</sup>H NMR spectrum for 3-ethyl-2-iodo-1-phenylpent-2-en-1-one 4o

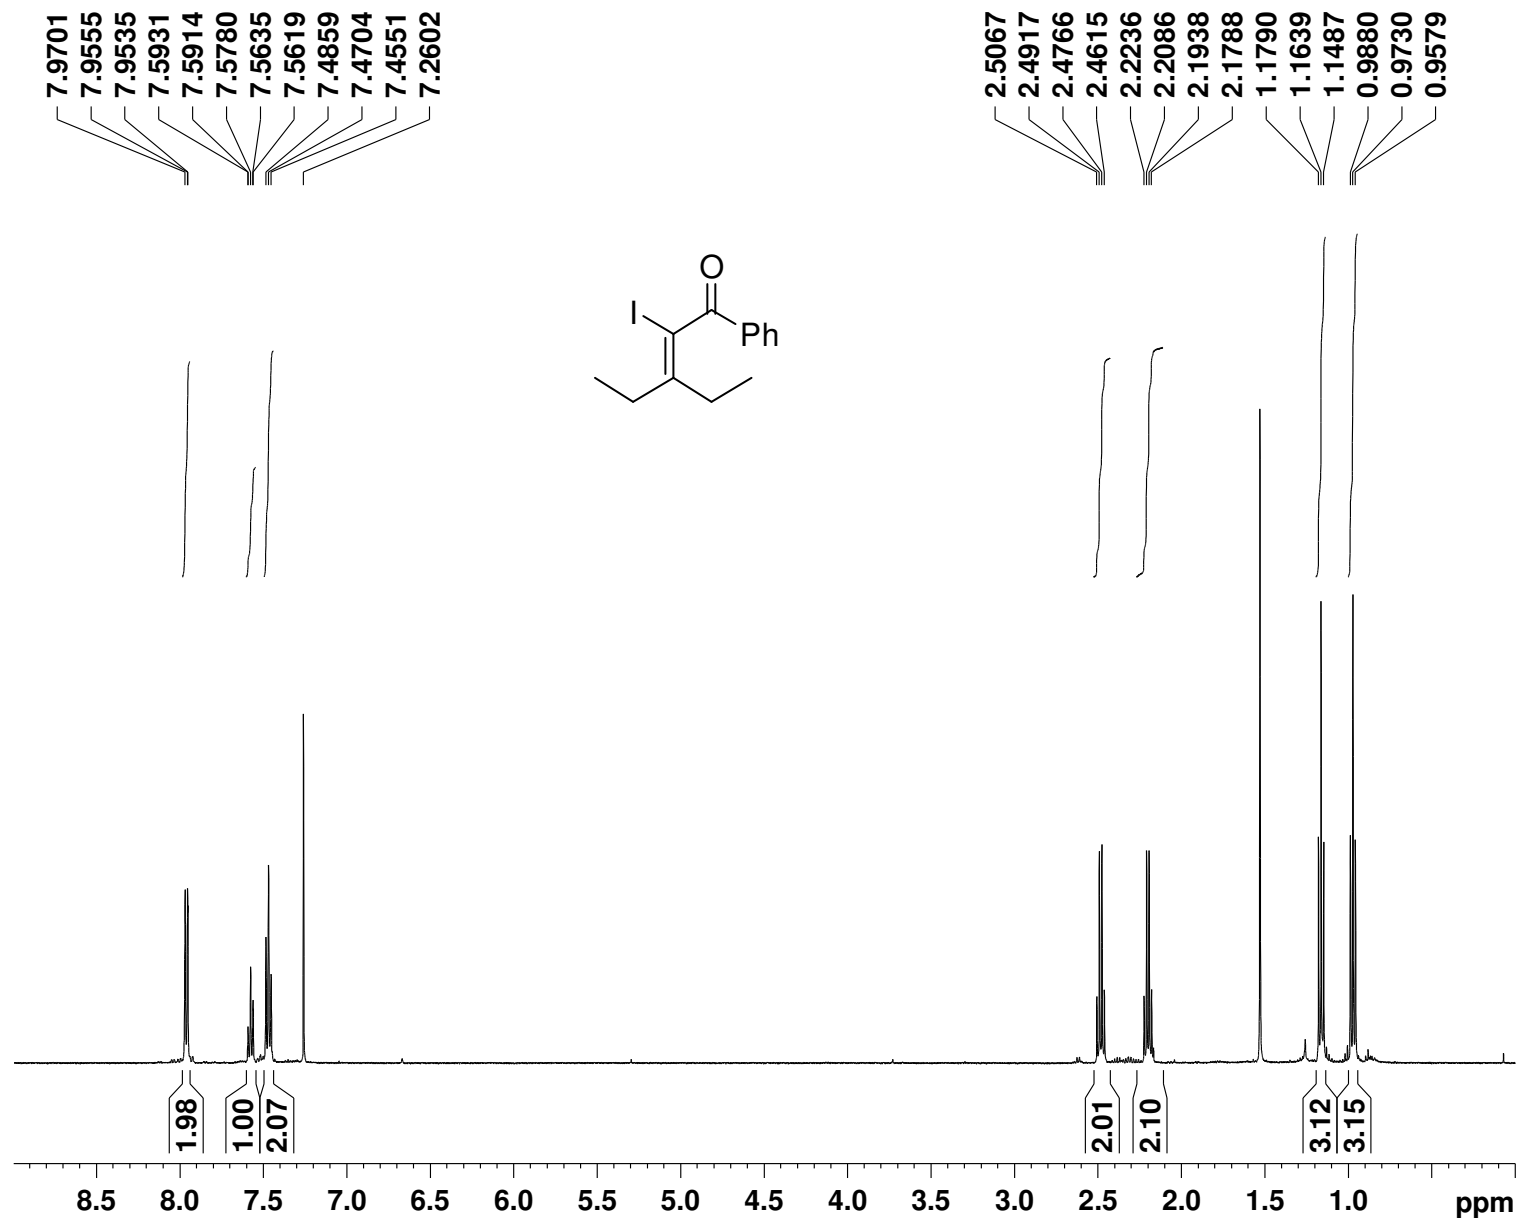

Current Data Parameters  
NAME ARM-1330\_500  
EXPNO 1  
PROCNO 1

F2 - Acquisition Parameters  
Date\_ 20111018  
Time 16.39  
INSTRUM av500  
PROBHD 5 mm PABBO BB-  
PULPROG zg30  
TD 65536  
SOLVENT CDCl3  
NS 16  
DS 2  
SWH 10330.578 Hz  
FIDRES 0.157632 Hz  
AQ 3.1719923 sec  
RG 1150  
DW 48.400 usec  
DE 6.00 usec  
TE 303.9 K  
D1 2.00000000 sec  
TD0 1

===== CHANNEL f1 =====  
NUC1 1H  
P1 9.70 usec  
PL1 0.10 dB  
SFO1 500.1330885 MHz

F2 - Processing parameters  
SI 32768  
SF 500.1300138 MHz  
WDW EM  
SSB 0  
LB 0.30 Hz  
GB 0  
PC 1.00

<sup>13</sup>C NMR spectrum for 3-ethyl-2-iodo-1-phenylpent-2-en-1-one 4o

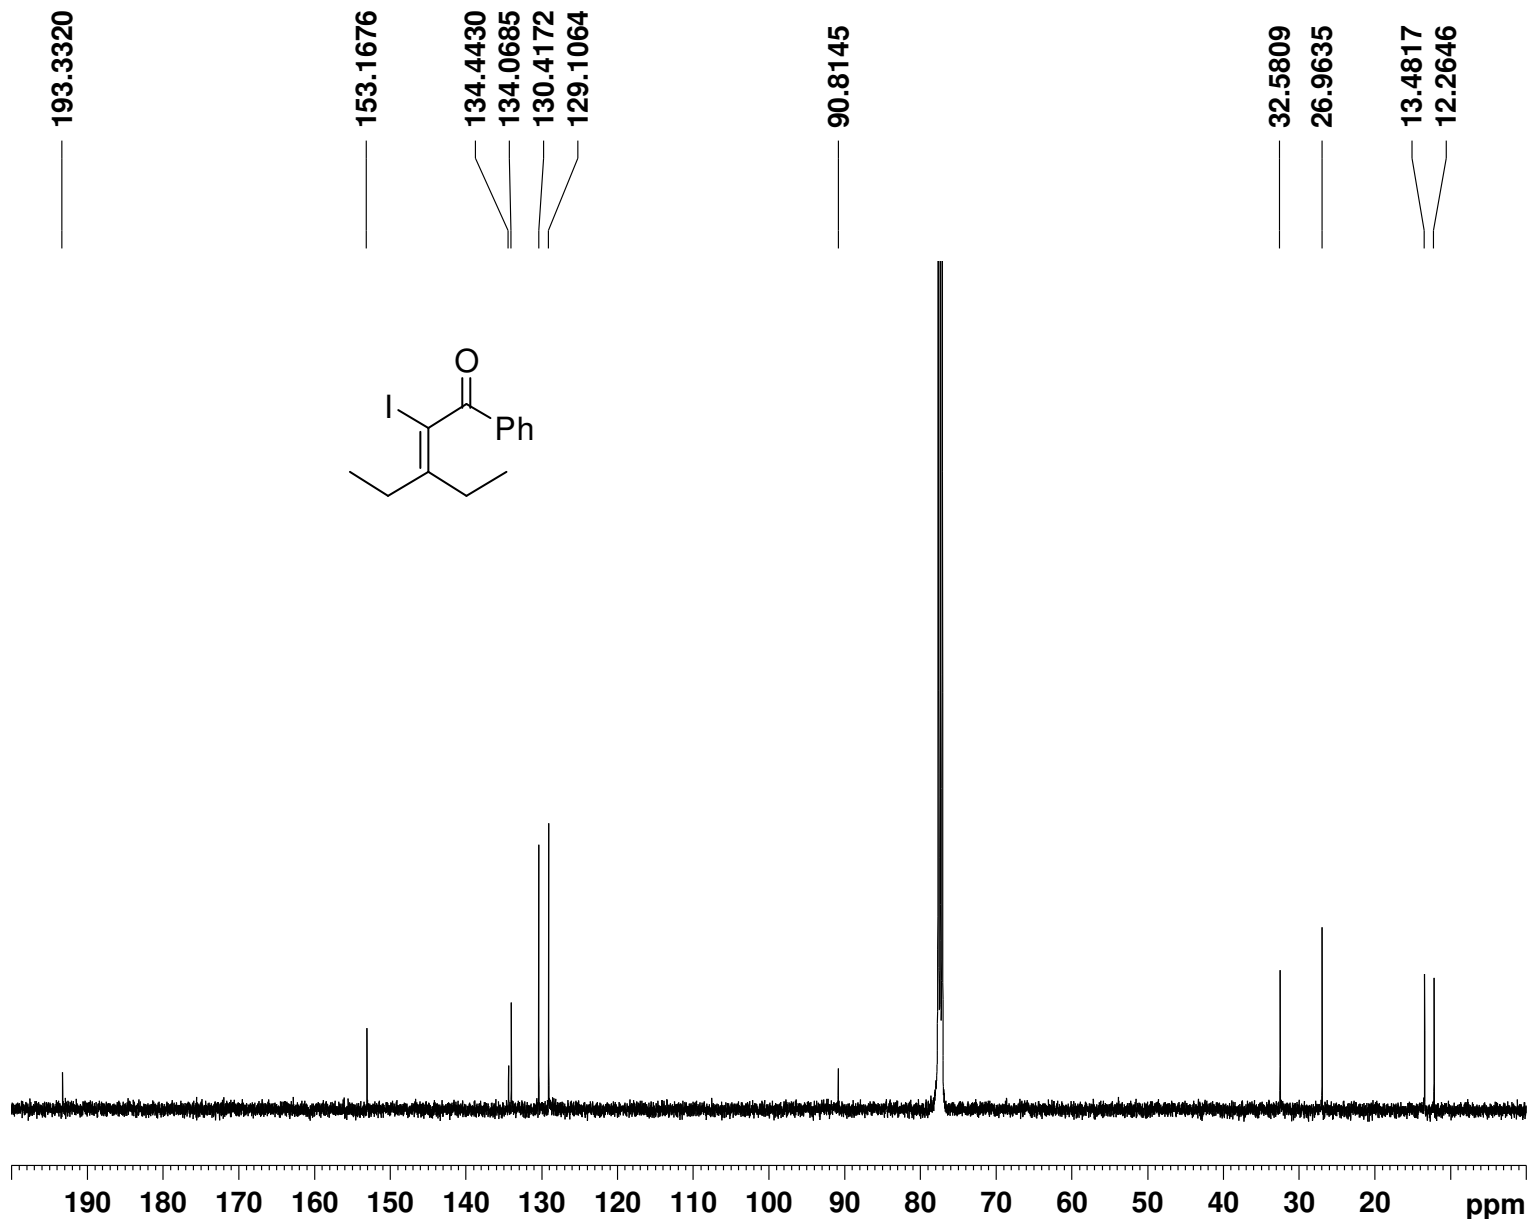

Current Data Parameters  
NAME ARM-1330\_500  
EXPNO 2  
PROCNO 1

F2 - Acquisition Parameters  
Date\_ 20111018  
Time 16.48  
INSTRUM av500  
PROBHD 5 mm PABBO BB-  
PULPROG zgpg30  
TD 65536  
SOLVENT CDCl3  
NS 8192  
DS 4  
SWH 30030.029 Hz  
FIDRES 0.458222 Hz  
AQ 1.0912244 sec  
RG 16400  
DW 16.650 usec  
DE 6.00 usec  
TE 308.3 K  
D1 2.0000000 sec  
d11 0.0300000 sec  
DELTA 1.89999998 sec  
TDO 256

==== CHANNEL f1 =====  
NUC1 13C  
P1 9.00 usec  
PL1 0.00 dB  
SFO1 125.7703637 MHz

==== CHANNEL f2 =====  
CPDPRG2 waltz16  
NUC2 1H  
PCPD2 80.00 usec  
PL2 0.00 dB  
PL12 18.00 dB  
PL13 18.00 dB  
SFO2 500.1320005 MHz

F2 - Processing parameters  
SI 32768  
SF 125.7577364 MHz  
WDW EM  
SSB 0  
LB 1.00 Hz  
GB 0  
PC 1.40



<sup>1</sup>H NMR spectrum for (*E*)-2-iodo-3-methyl-1-phenylpent-2-en-1-one 4p

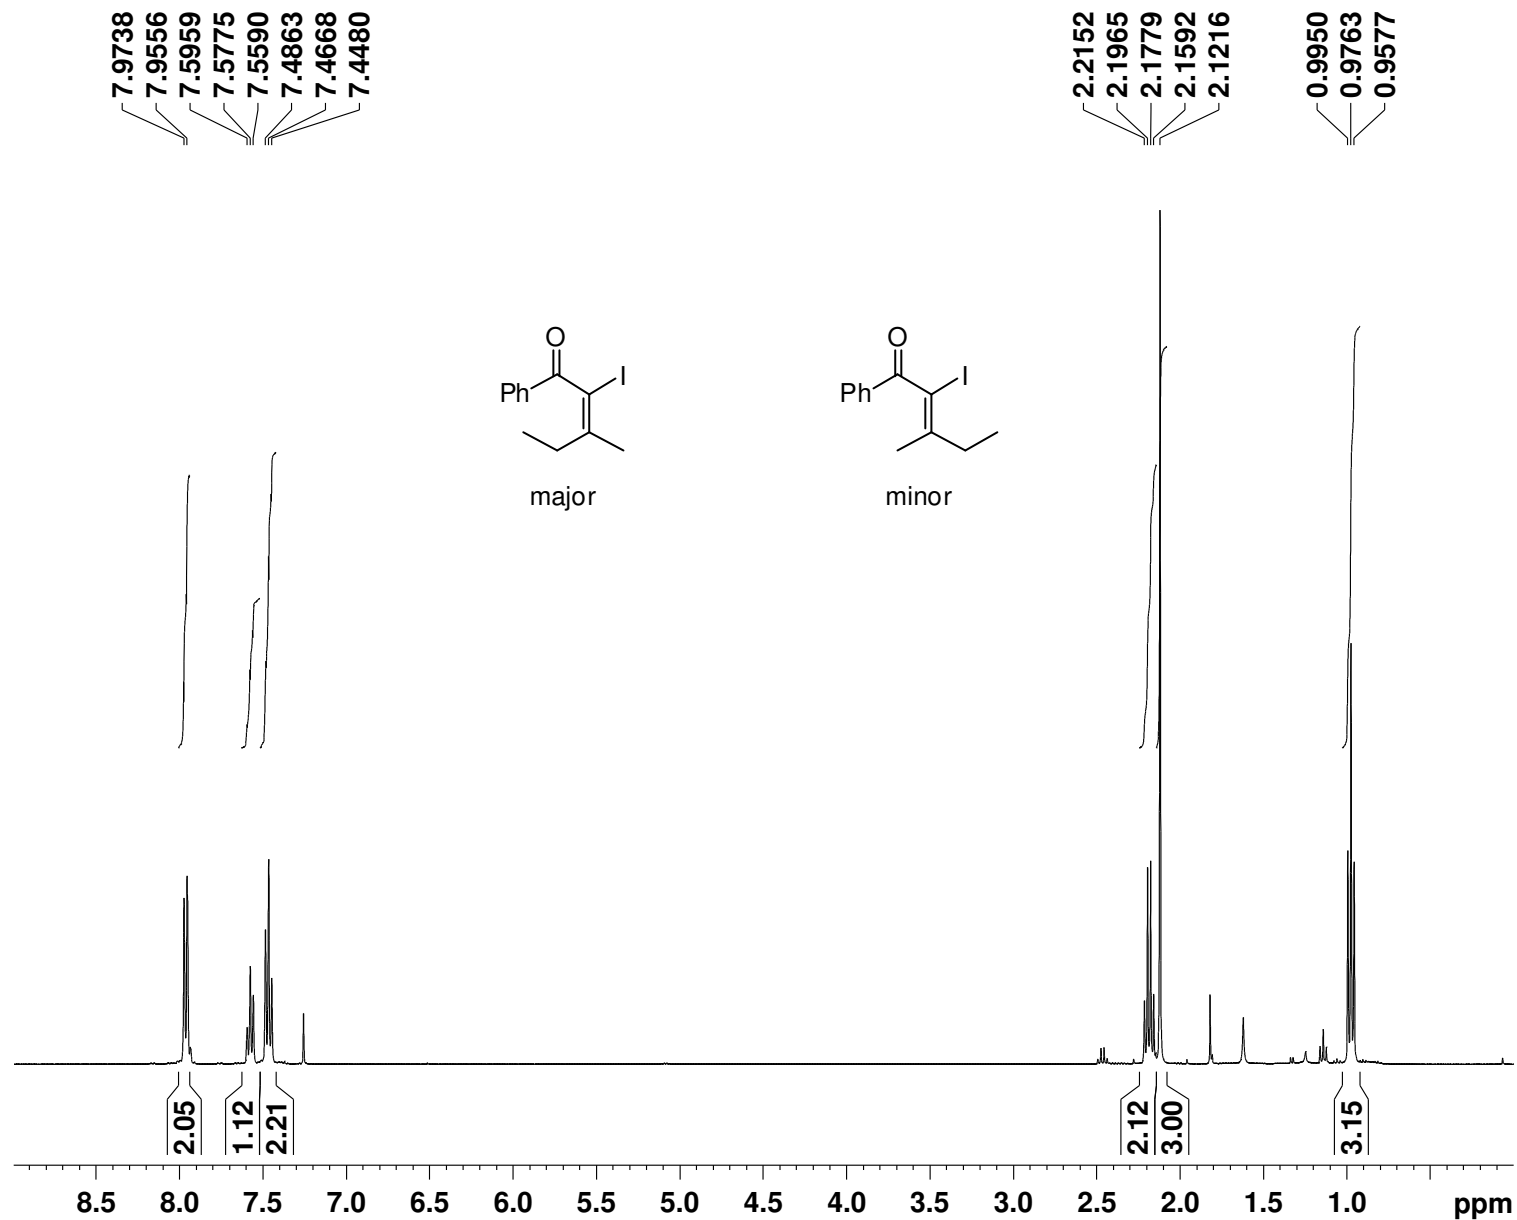

```
Current Data Parameters
NAME          WM-510
EXPNO         60
PROCNO        1

F2 - Acquisition Parameters
Date_         20120919
Time          17.39
INSTRUM       spect
PROBHD        5 mm PABBO BB/
PULPROG       zg30
TD            65536
SOLVENT       CDC13
NS            16
DS            0
SWH           8223.685 Hz
FIDRES        0.125483 Hz
AQ            3.9845889 sec
RG            65.91
DW            60.800 usec
DE            10.69 usec
TE            294.2 K
D1            1.0000000 sec
TDO           1

===== CHANNEL f1 =====
SFO1          400.1324710 MHz
NUC1           1H
P1             8.00 usec
PLW1          24.00000000 W

F2 - Processing parameters
SI            131072
SF            400.1300109 MHz
WDW           EM
SSB           0
LB            0.30 Hz
GB            0
PC            1.50
```

<sup>13</sup>C NMR spectrum for (*E*)-2-iodo-3-methyl-1-phenylpent-2-en-1-one 4p

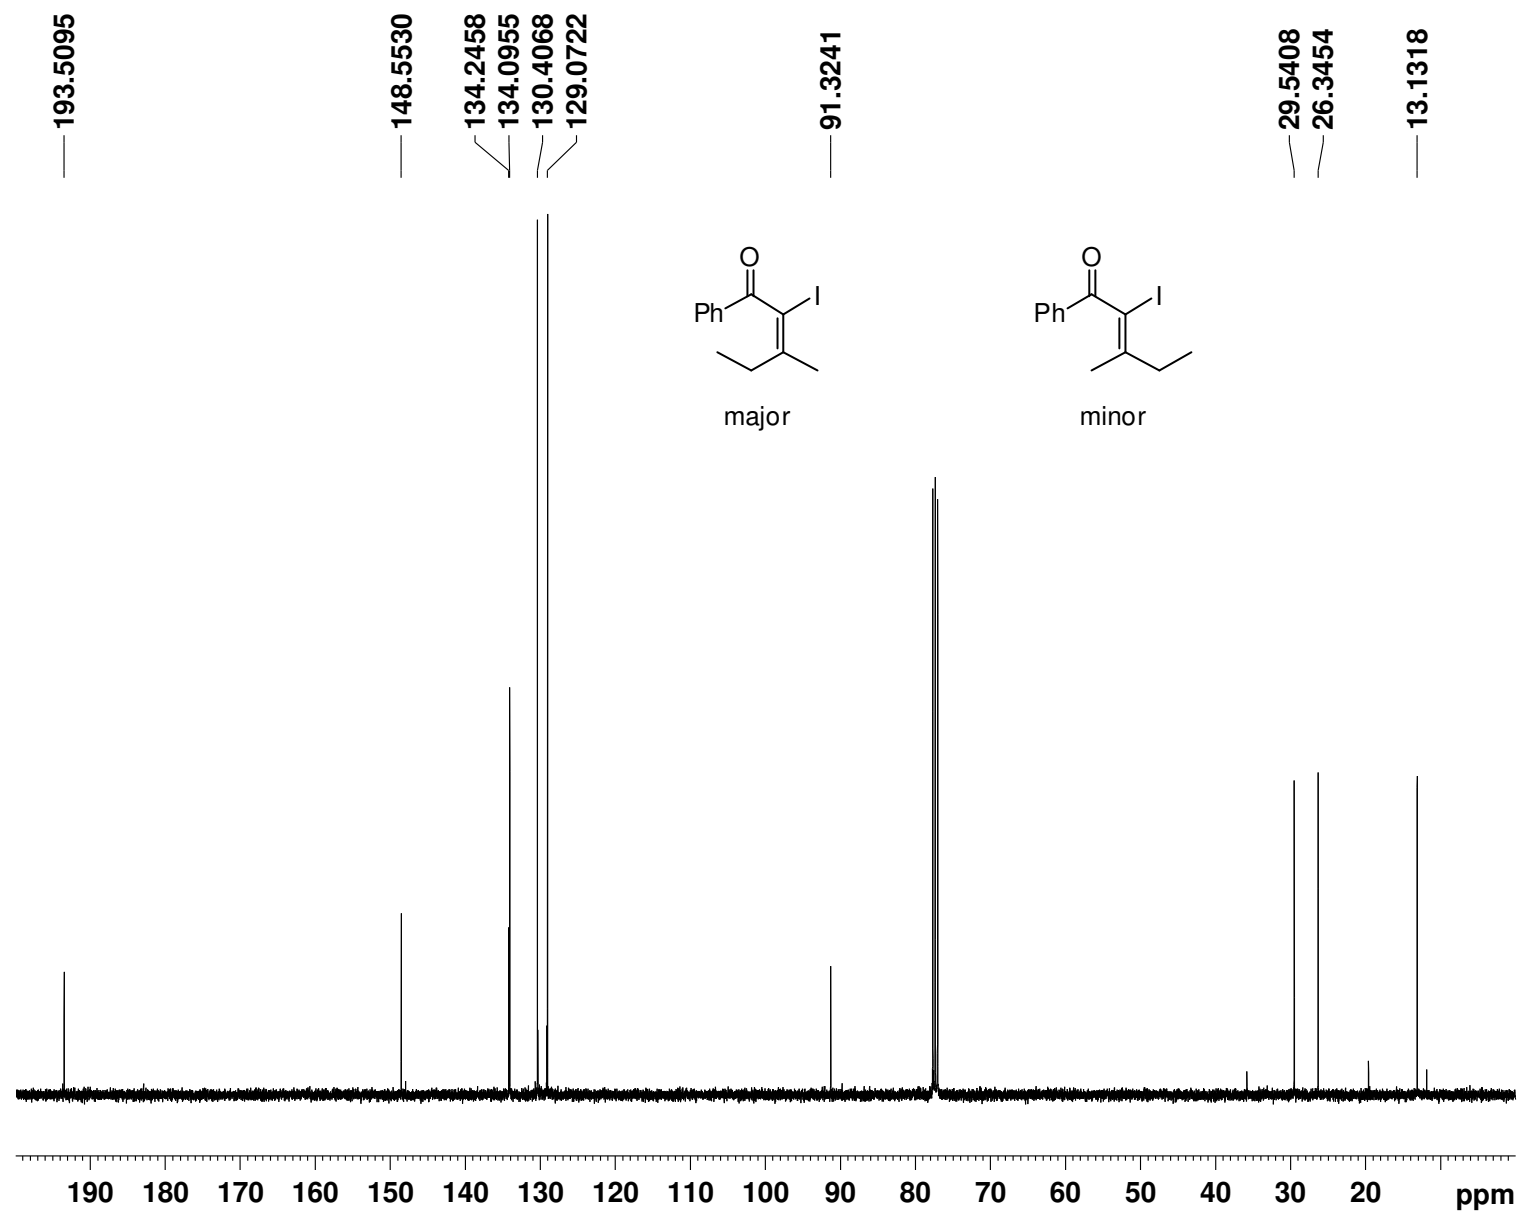

```
Current Data Parameters
NAME      WM-510
EXPNO     61
PROCNO    1

F2 - Acquisition Parameters
Date_     20120919
Time      17.54
INSTRUM   spect
PROBHD    5 mm PABBO BB/
PULPROG   zgpg30
TD        65536
SOLVENT   CDC13
NS        256
DS        4
SWH       24038.461 Hz
FIDRES    0.366798 Hz
AQ        1.3631488 sec
RG        181.72
DW        20.800 usec
DE        8.18 usec
TE        294.5 K
D1        2.0000000 sec
D11       0.0300000 sec
TDO       1

===== CHANNEL f1 =====
SFO1      100.6228293 MHz
NUC1      13C
P1        9.00 usec
PLW1      77.0000000 W

===== CHANNEL f2 =====
SFO2      400.1316005 MHz
NUC2      1H
CPDPRG[2] waltz16
PCPD2     90.00 usec
PLW2      24.0000000 W
PLW12     0.17567000 W
PLW13     0.14229999 W

F2 - Processing parameters
SI        65536
SF        100.6127354 MHz
WDW       EM
SSB       0
LB        0.50 Hz
GB        0
PC        1.40
```

### NOESY spectrum for (*E*)-2-iodo-3-methyl-1-phenylpent-2-en-1-one 4p

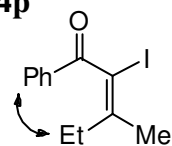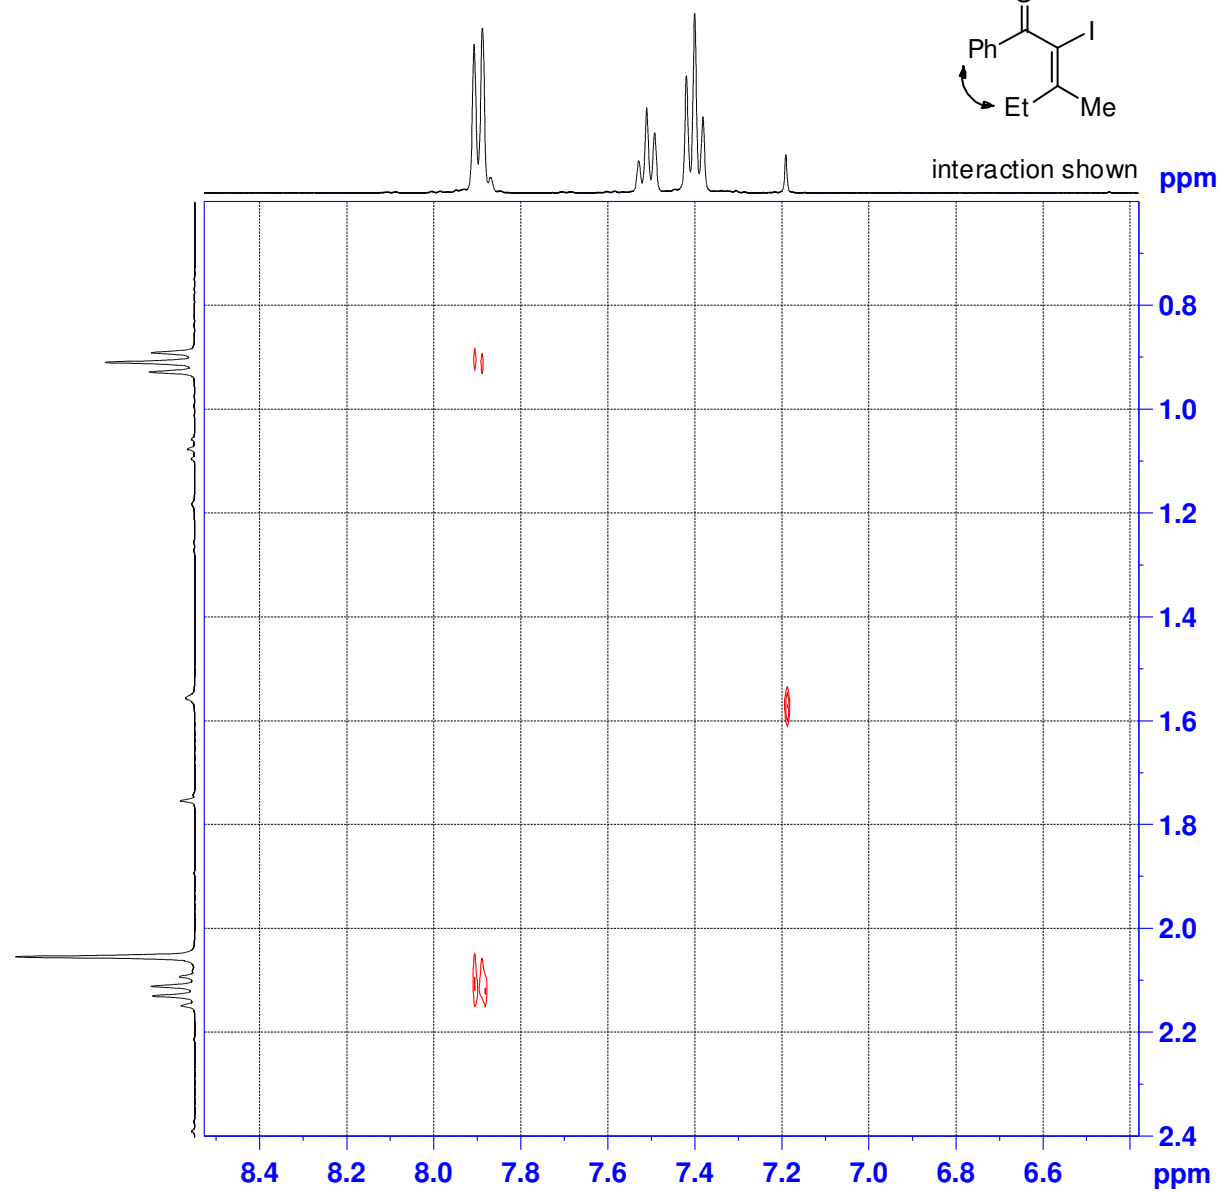

```
Current Data Parameters
NAME          WM-510
EXPNO         101
PROCNO        1

F2 - Acquisition Parameters
Date_         20120920
Time_         12.23
INSTRUM       spect
PROBHD        5 mm PABBO BB/
PULPROG       noesygpphpp
TD            2048
SOLVENT       CDCl3
NS            2
DS            32
SWH           3424.657 Hz
FIDRES        1.672196 Hz
AQ            0.2990080 sec
RG            25
DW            146.000 usec
DE            23.49 usec
TE            294.1 K
D0            0.00013581 sec
D1            1.93364406 sec
D8            0.50000000 sec
D11           0.03000000 sec
D12           0.00002000 sec
D16           0.00020000 sec
IN0           0.00029200 sec

===== CHANNEL f1 =====
SF01          400.1317910 MHz
NUC1          1H
P1            8.00 usec
P2            16.00 usec
P17           2500.00 usec
PLW1          24.00000000 W
PLW10         2.27220011 W

===== GRADIENT CHANNEL =====
GPNAM[1]     SMSQ10.100
GPZ1         40.00 %
P16          1000.00 usec

F1 - Acquisition parameters
TD           256
SF01         400.1318 MHz
FIDRES       13.377568 Hz
SW           8.559 ppm
FnMODE       States-TPPI

F2 - Processing parameters
SI           1024
SF           400.1300376 MHz
WDW          QSINE
SSB          2
LB           0 Hz
GB           0
PC           1.00

F1 - Processing parameters
SI           1024
MC2          States-TPPI
SF           400.1300376 MHz
WDW          QSINE
SSB          2
LB           0 Hz
GB           0
```

<sup>1</sup>H NMR spectrum for (Z)-2-iodo-3-methyl-1-phenylpent-2-en-1-one 4p

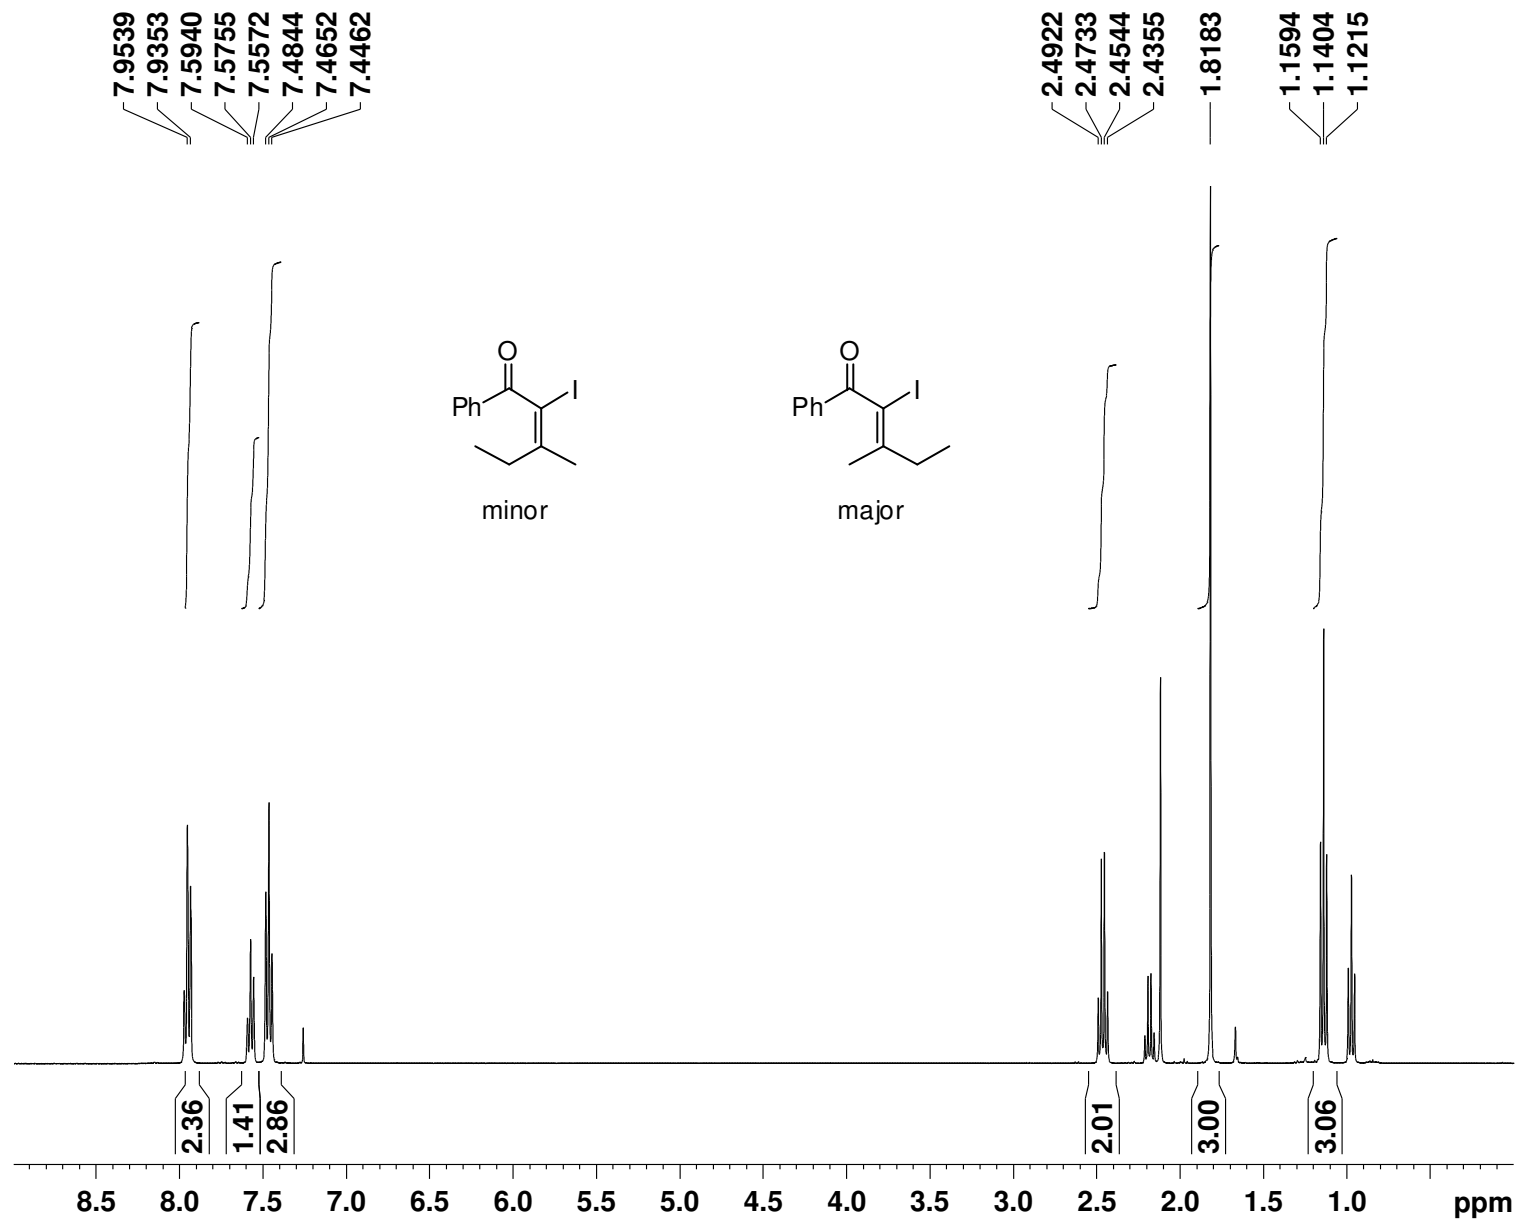

```
Current Data Parameters
NAME          WM-510
EXPNO         40
PROCNO        1

F2 - Acquisition Parameters
Date_         20120919
Time          12.03
INSTRUM       spect
PROBHD        5 mm PABBO BB/
PULPROG       zg30
TD            65536
SOLVENT       CDC13
NS            16
DS            0
SWH           8223.685 Hz
FIDRES        0.125483 Hz
AQ            3.9845889 sec
RG            46.39
DW            60.800 usec
DE            10.69 usec
TE            294.1 K
D1            1.00000000 sec
TD0           1

===== CHANNEL f1 =====
SF01          400.1324710 MHz
NUC1           1H
P1             8.00 usec
PLW1          24.00000000 W

F2 - Processing parameters
SI            131072
SF            400.1300101 MHz
WDW           EM
SSB           0
LB            0.30 Hz
GB            0
PC            1.50
```

<sup>13</sup>C NMR spectrum for (Z)-2-iodo-3-methyl-1-phenylpent-2-en-1-one 4p

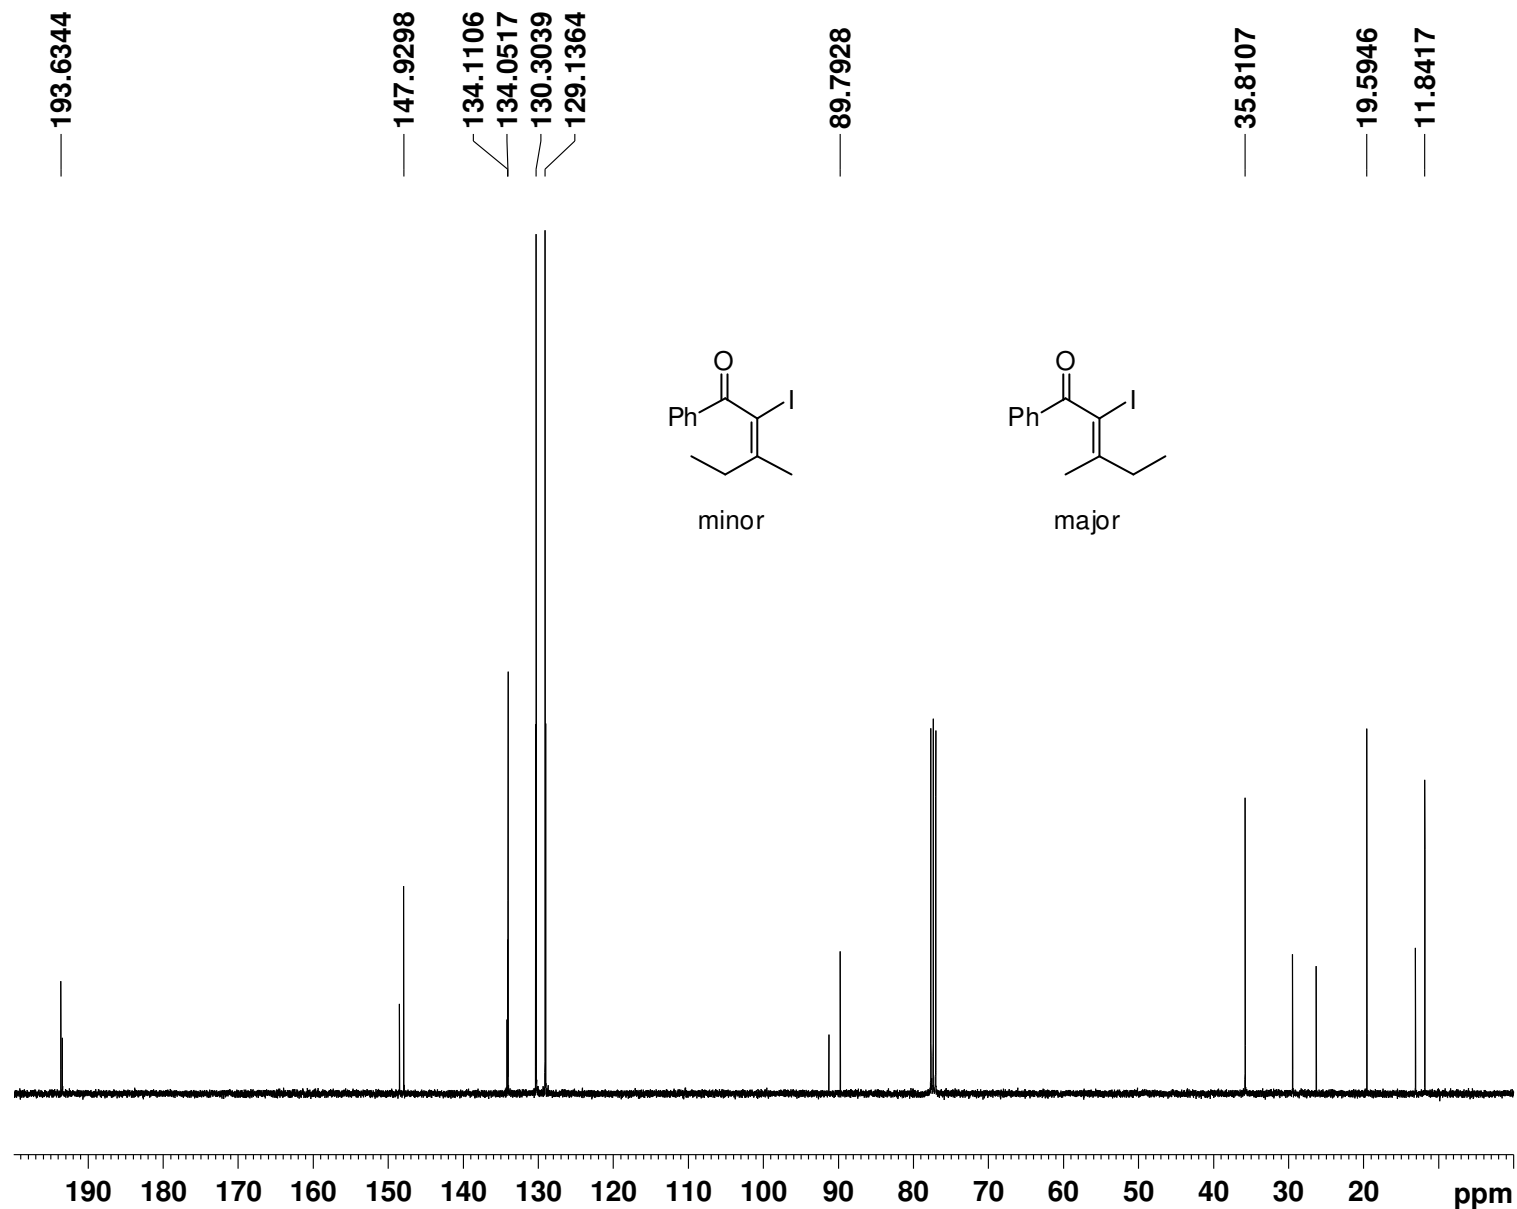

```
Current Data Parameters
NAME          WM-510
EXPNO         80
PROCNO        1

F2 - Acquisition Parameters
Date_         20120920
Time          11.16
INSTRUM       spect
PROBHD        5 mm PABBO BB/
PULPROG       zgpg30
TD            65536
SOLVENT       CDC13
NS            256
DS            4
SWH           24038.461 Hz
FIDRES        0.366798 Hz
AQ            1.3631488 sec
RG            181.72
DW            20.800 usec
DE            8.18 usec
TE            294.4 K
D1            2.0000000 sec
D11           0.0300000 sec
TDO           1

===== CHANNEL f1 =====
SF01          100.6228293 MHz
NUC1           13C
P1             9.00 usec
PLW1          77.0000000 W

===== CHANNEL f2 =====
SF02          400.1316005 MHz
NUC2           1H
CPDPRG[2]     waltz16
PCPD2         90.00 usec
PLW2          24.0000000 W
PLW12         0.1756700 W
PLW13         0.14229999 W

F2 - Processing parameters
SI            65536
SF            100.6127392 MHz
WDW           EM
SSB           0
LB            0.50 Hz
GB            0
PC            1.40
```

<sup>1</sup>H NMR spectrum for (*E*)-2-iodo-3,4,4-trimethyl-1-phenylpent-2-en-1-one 4q

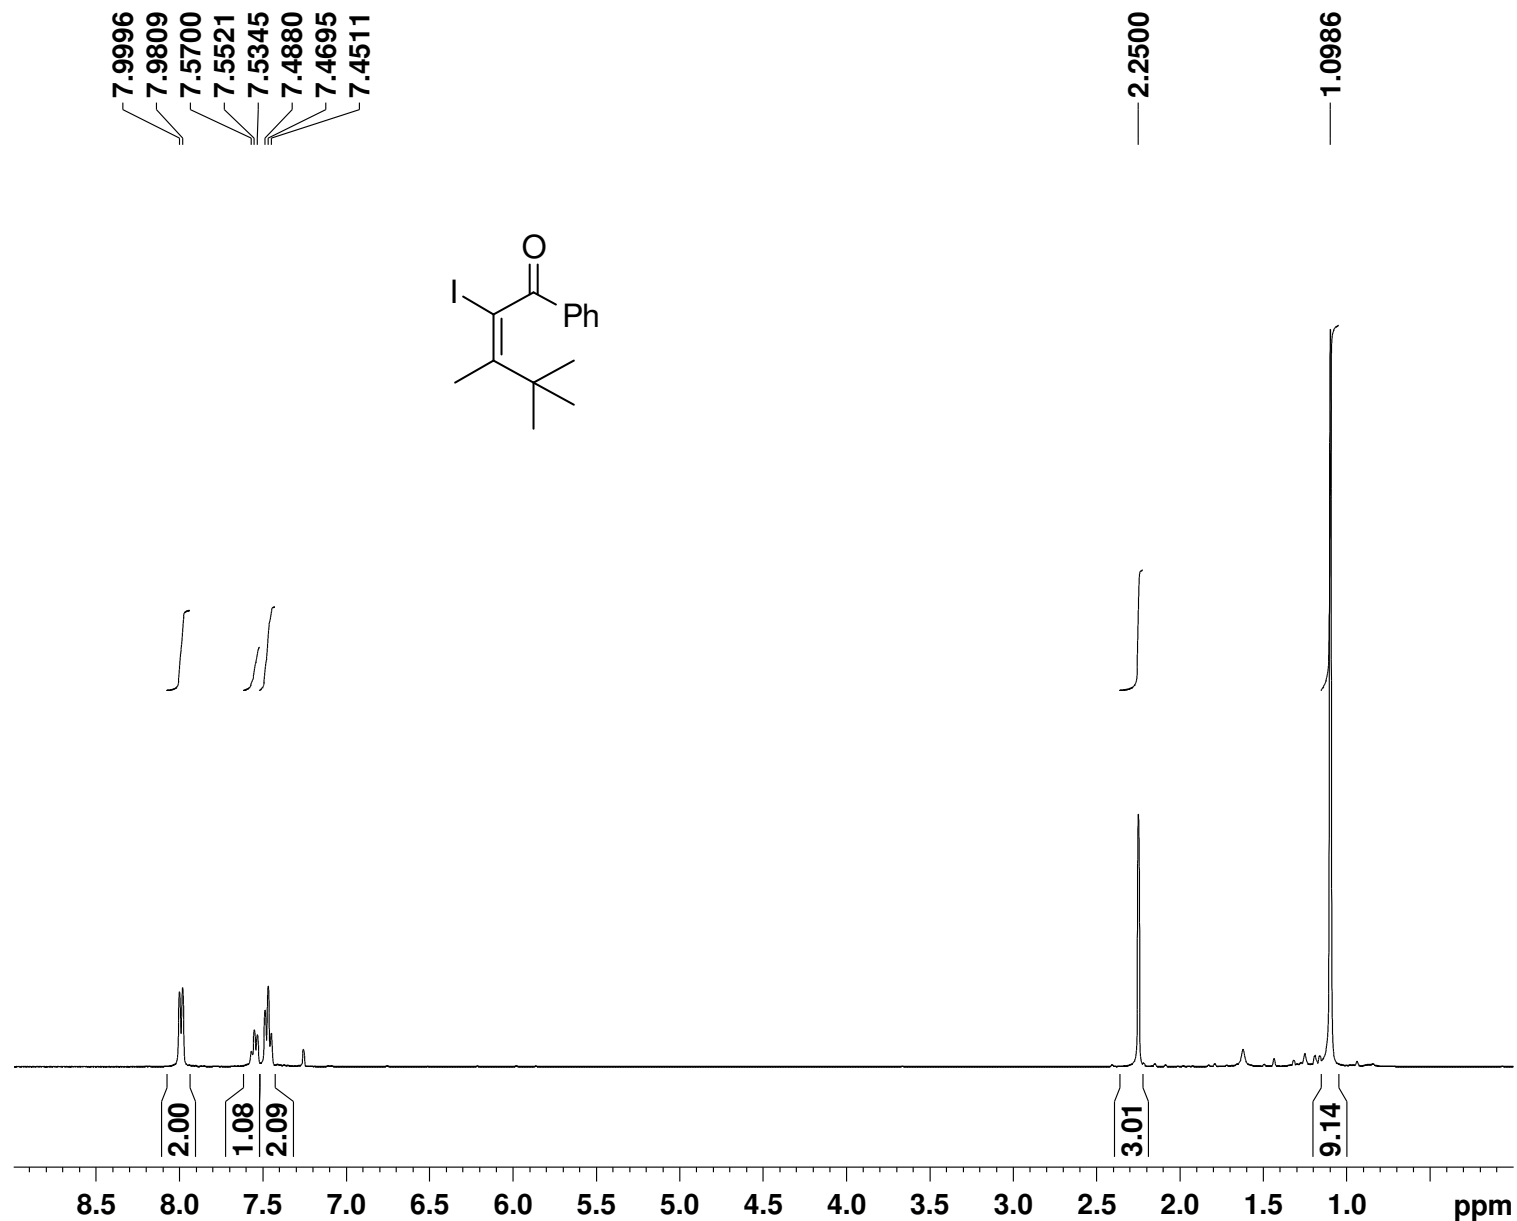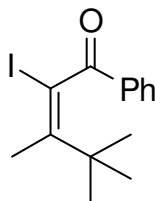

Current Data Parameters  
NAME WM-507  
EXPNO 90  
PROCNO 1

F2 - Acquisition Parameters  
Date\_ 20120906  
Time 17.26  
INSTRUM spect  
PROBHD 5 mm PABBO BB/  
PULPROG zg30  
TD 65536  
SOLVENT CDC13  
NS 16  
DS 0  
SWH 8223.685 Hz  
FIDRES 0.125483 Hz  
AQ 3.9845889 sec  
RG 59.2  
DW 60.800 usec  
DE 10.69 usec  
TE 293.8 K  
D1 1.00000000 sec  
TD0 1

==== CHANNEL f1 =====  
SFO1 400.1324710 MHz  
NUC1 1H  
P1 8.00 usec  
PLW1 24.00000000 W

F2 - Processing parameters  
SI 131072  
SF 400.1300109 MHz  
WDW EM  
SSB 0  
LB 0.30 Hz  
GB 0  
PC 1.50

<sup>13</sup>C NMR spectrum for (*E*)-2-iodo-3,4,4-trimethyl-1-phenylpent-2-en-1-one 4q

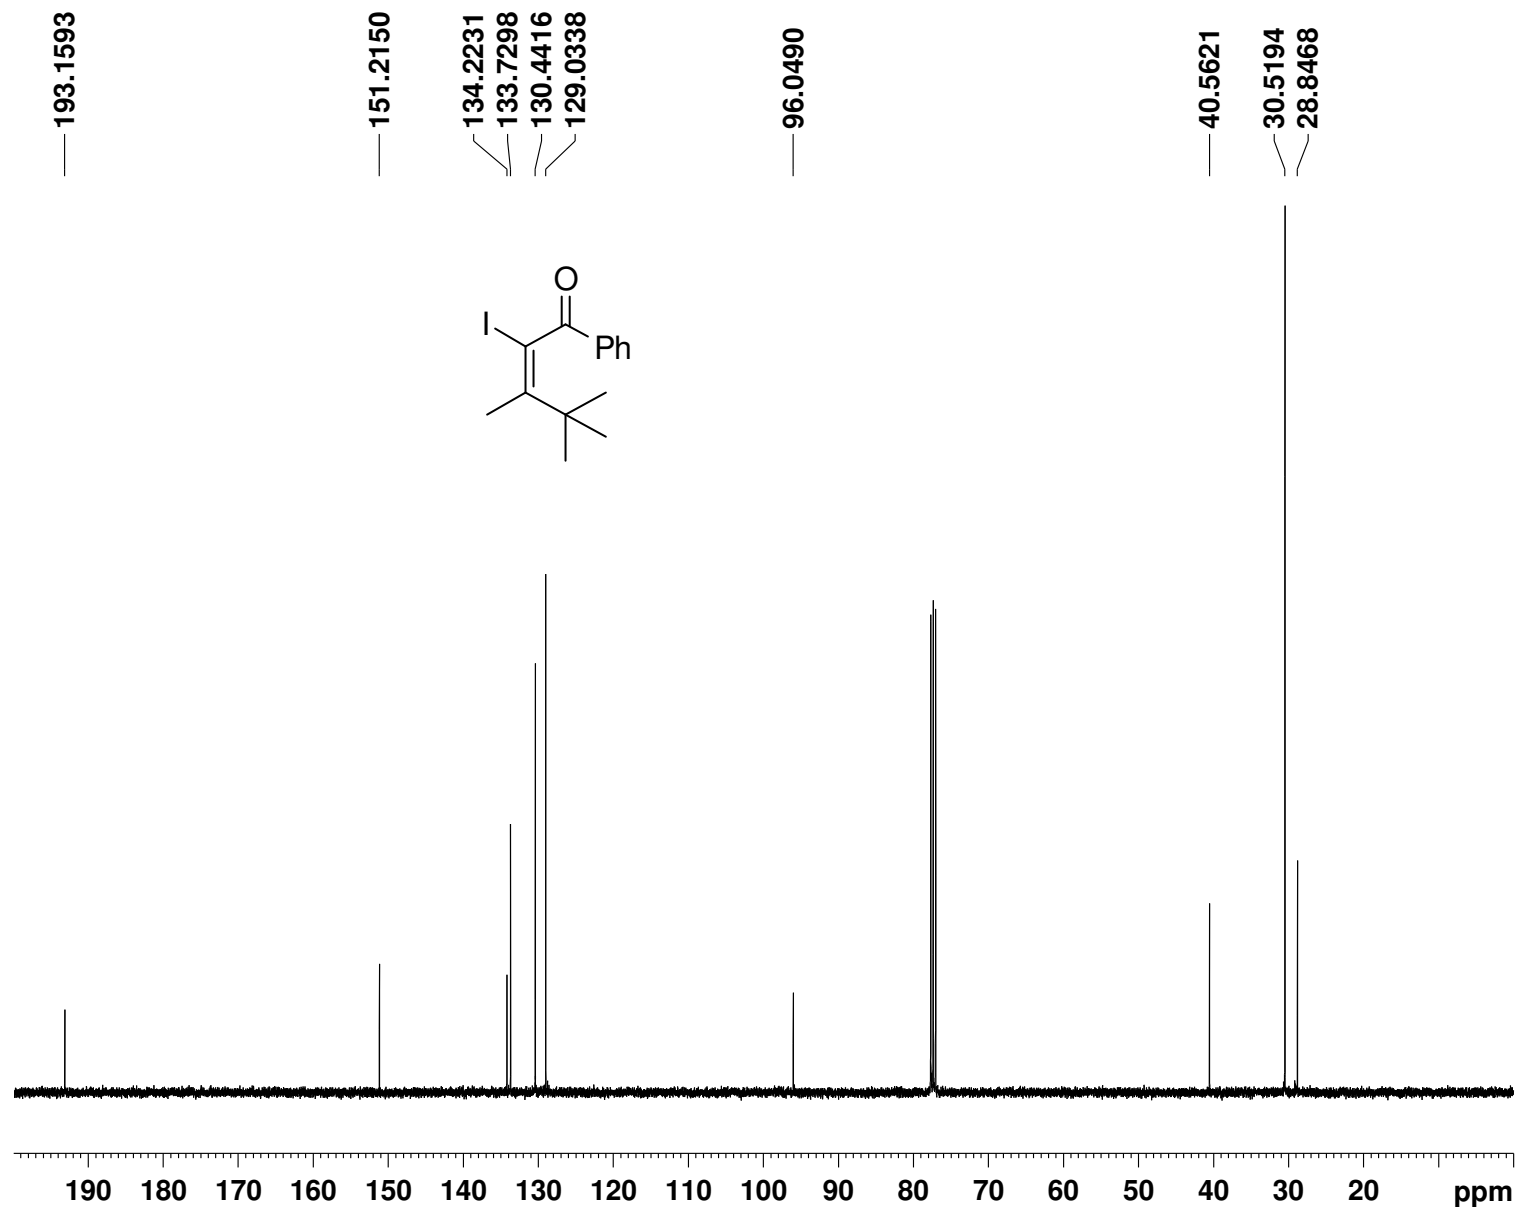

```
Current Data Parameters
NAME          WM-507
EXPNO         91
PROCNO        1

F2 - Acquisition Parameters
Date_         20120906
Time          17.42
INSTRUM       spect
PROBHD        5 mm PABBO BB/
PULPROG       zgpg30
TD            65536
SOLVENT       CDC13
NS            256
DS            4
SWH           24038.461 Hz
FIDRES        0.366798 Hz
AQ            1.3631488 sec
RG            181.72
DW            20.800 usec
DE            8.18 usec
TE            294.4 K
D1            2.0000000 sec
D11           0.0300000 sec
TD0           1

===== CHANNEL f1 =====
SF01          100.6228293 MHz
NUC1           13C
P1             9.00 usec
PLW1          77.0000000 W

===== CHANNEL f2 =====
SF02          400.1316005 MHz
NUC2           1H
CPDPRG[2]     waltz16
PCPD2         90.00 usec
PLW2          24.0000000 W
PLW12         0.1756700 W
PLW13         0.14229999 W

F2 - Processing parameters
SI            65536
SF            100.6127344 MHz
WDW           EM
SSB           0
LB            0.50 Hz
GB            0
PC            1.40
```

### NOESY spectrum for (*E*)-2-iodo-3,4,4-trimethyl-1-phenylpent-2-en-1-one 4q

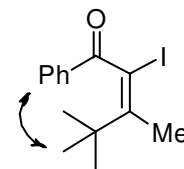

interaction shown

```
Current Data Parameters
NAME      WM507_500
EXPNO     5
PROCNO    1

F2 - Acquisition Parameters
Date_     20120910
Time      23.11
INSTRUM   av500sgu
PROBHD    5 mm PABBO BB-
PULPROG   noesyph
TD         2048
SOLVENT   CDC13
NS         16
DS         4
SWH        4340.278 Hz
FIDRES     2.119276 Hz
AQ         0.2360448 sec
RG         64
DW         115.200 usec
DE         6.00 usec
TE         296.8 K
D0         0.00010285 sec
D1         1.96436501 sec
D8         0.69999999 sec
IN0        0.00023040 sec
```

```
===== CHANNEL f1 =====
NUC1      1H
P1         9.70 usec
PL1        0.10 dB
PL1W      22.82879257 W
SF01      500.1322275 MHz
```

```
F1 - Acquisition parameters
TD         256
SF01      500.1322 MHz
FIDRES     16.954210 Hz
SW         8.678 ppm
FnMODE     States-TPPI
```

```
F2 - Processing parameters
SI         1024
SF         500.1300480 MHz
WDW        QSINE
SSB         2
LB         0 Hz
GB         0
PC         1.00
```

```
F1 - Processing parameters
SI         1024
MC2        States-TPPI
SF         500.1300480 MHz
WDW        QSINE
SSB         2
LB         0 Hz
GB         0
```

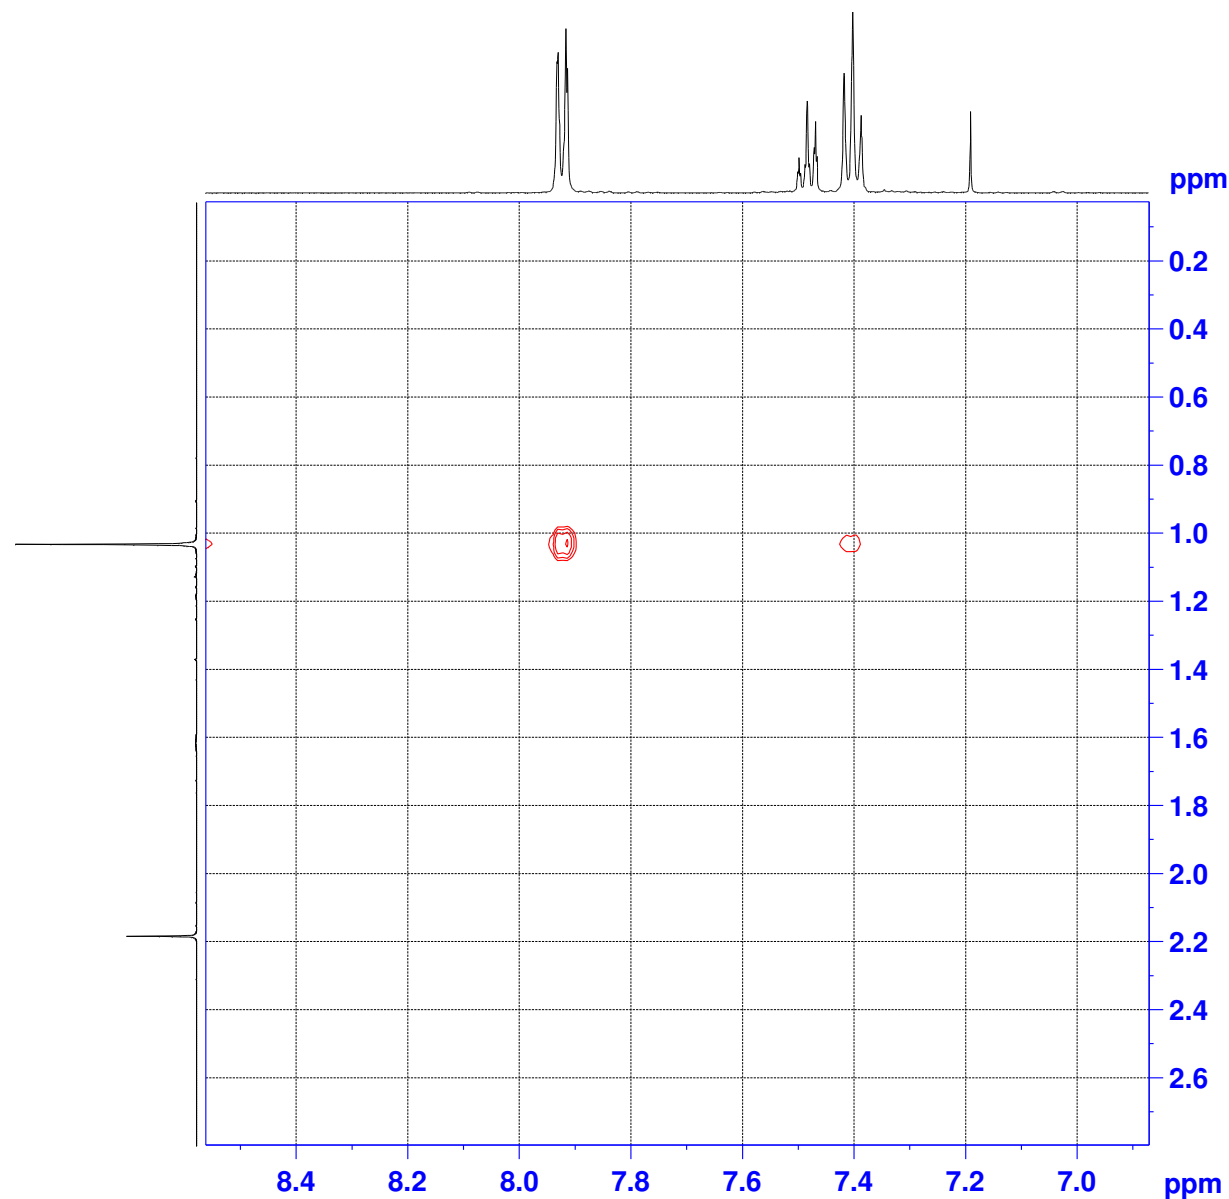

Supplement: c2ob26360b.pdf [file c2ob26360b.pdf]
